# Supplementary material for: Losartan ameliorates dystrophic epidermolysis bullosa and uncovers new disease mechanisms
Source: PubMed Central journal article supplement (PMC4568953; doi:10.15252/emmm.201505061), 2015-07-20
Supplement: emmm0007-1211-sd5.pdf [file emmm0007-1211-sd5.pdf]

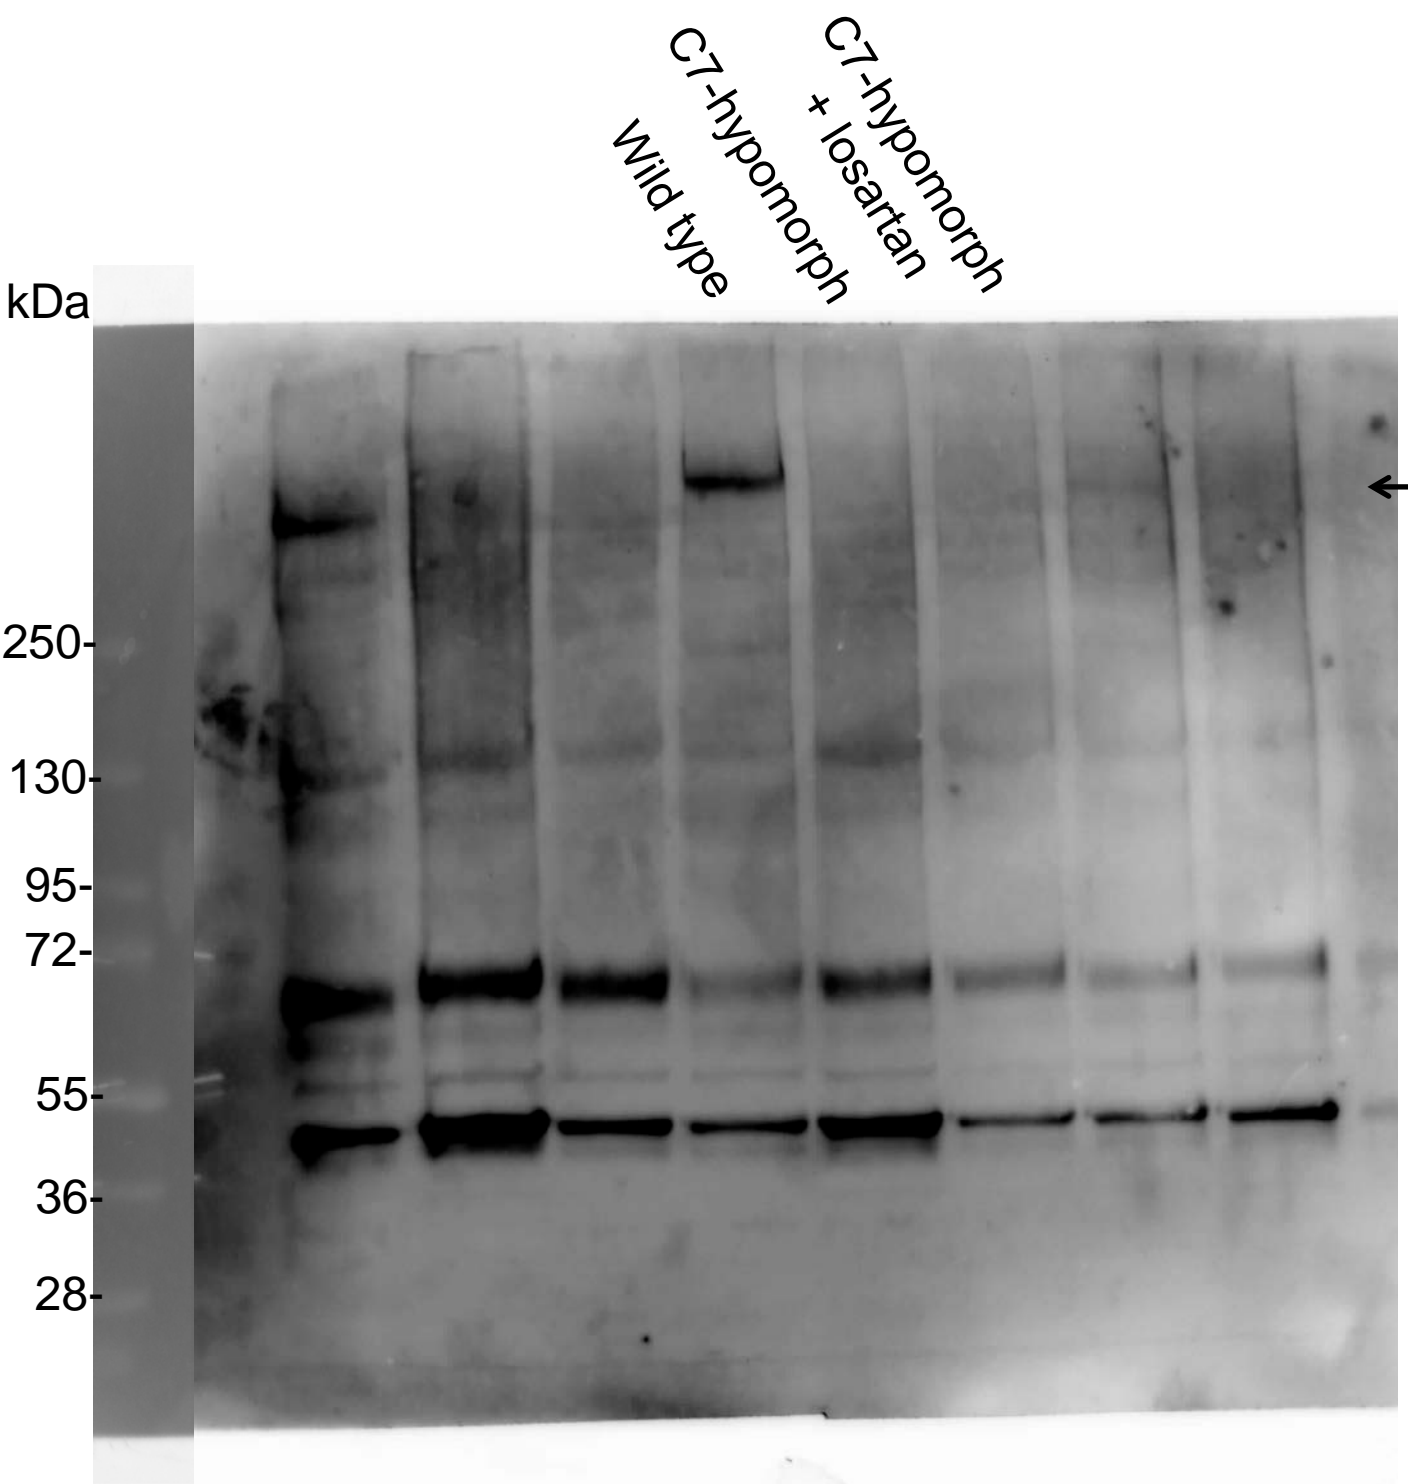

**Figure 5A. C7**

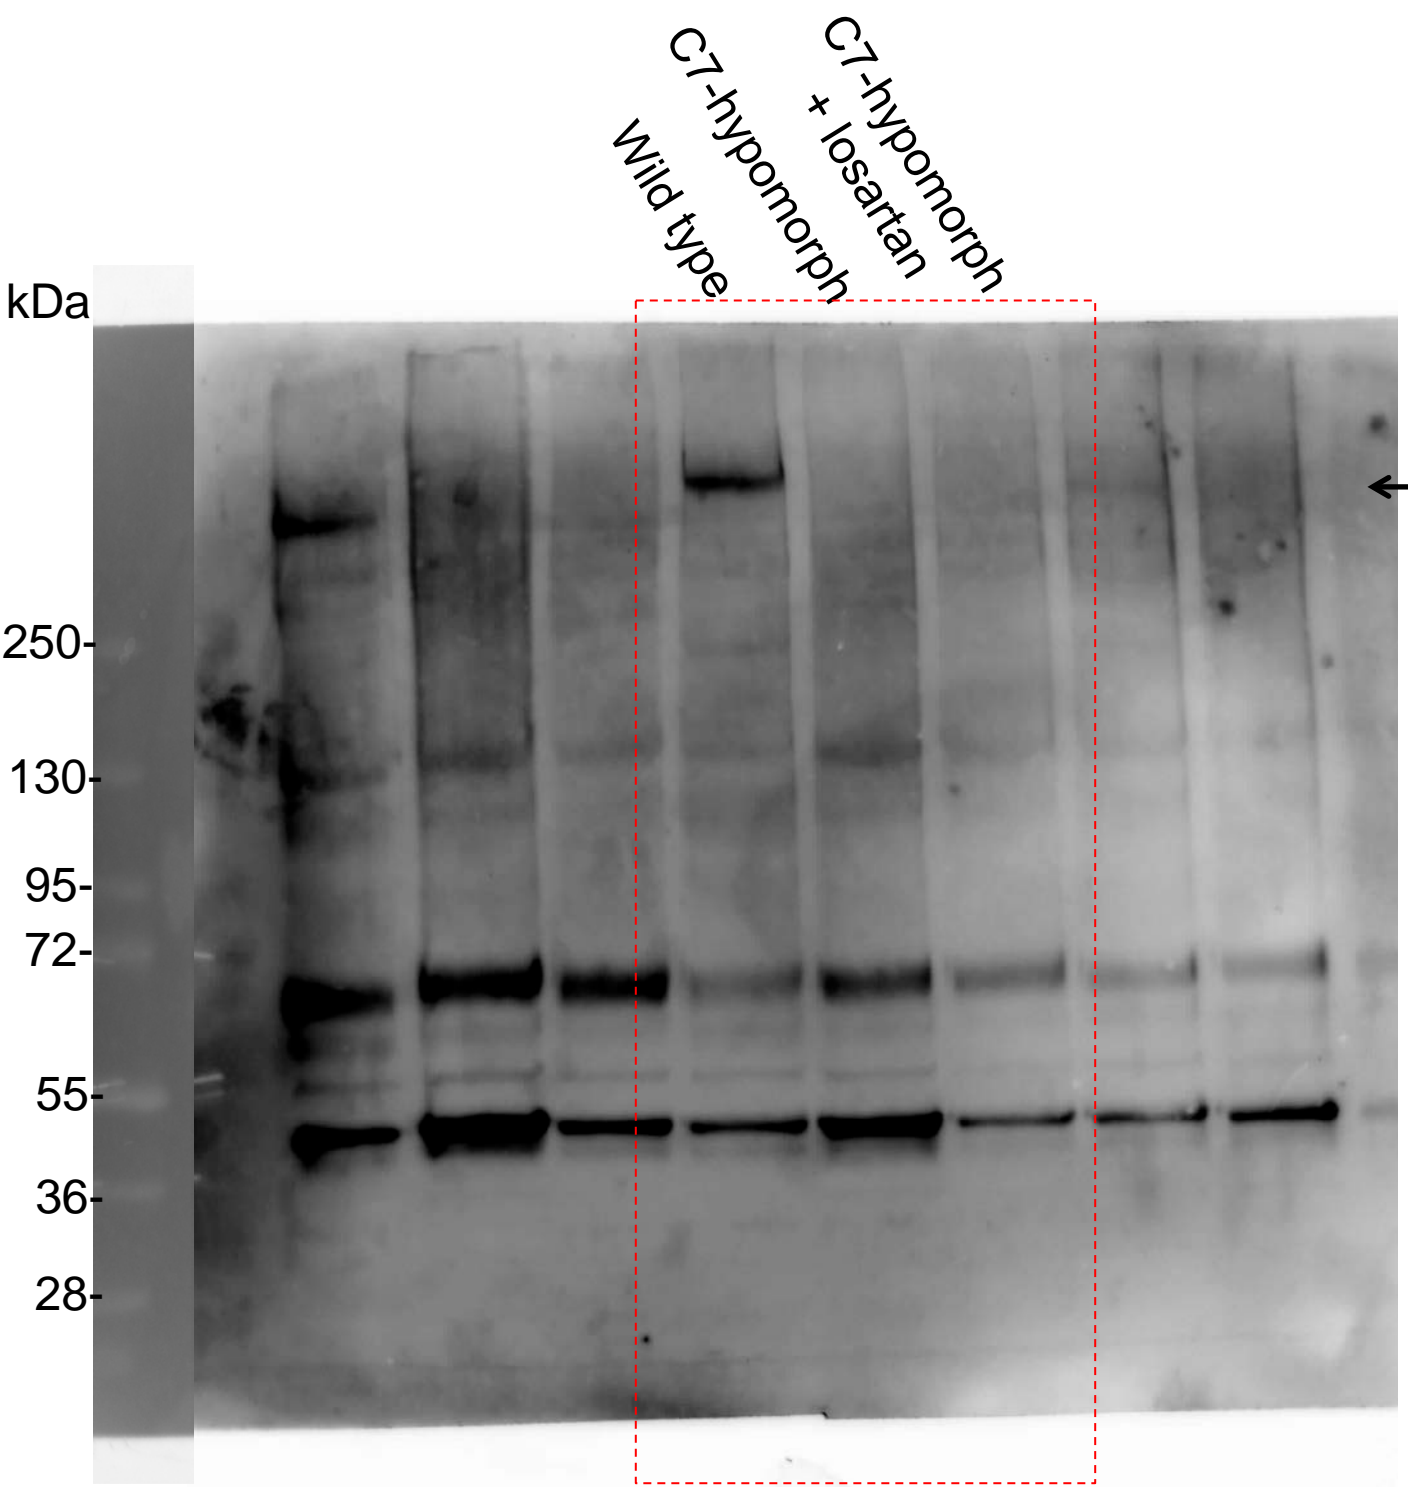

**Figure 5A. C7**

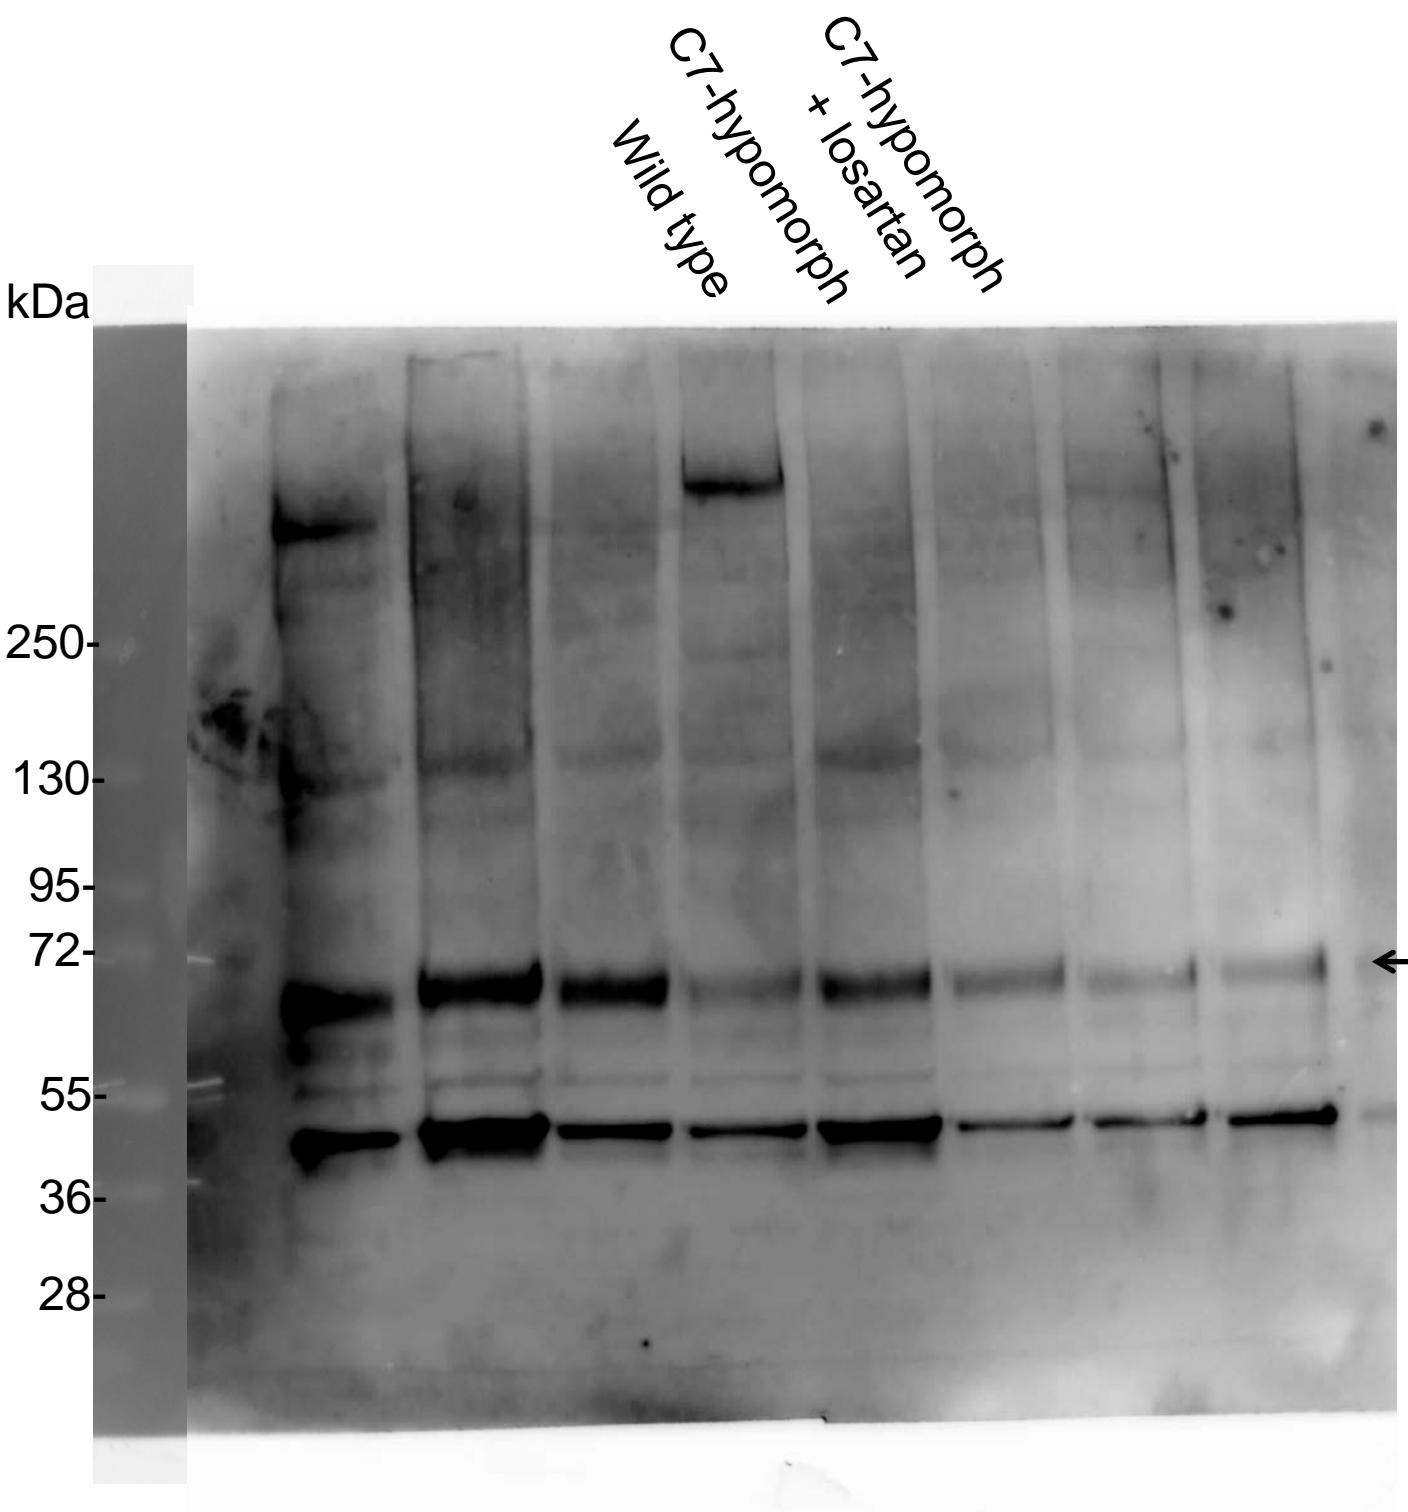

**Figure 5A.** Tgfbr2

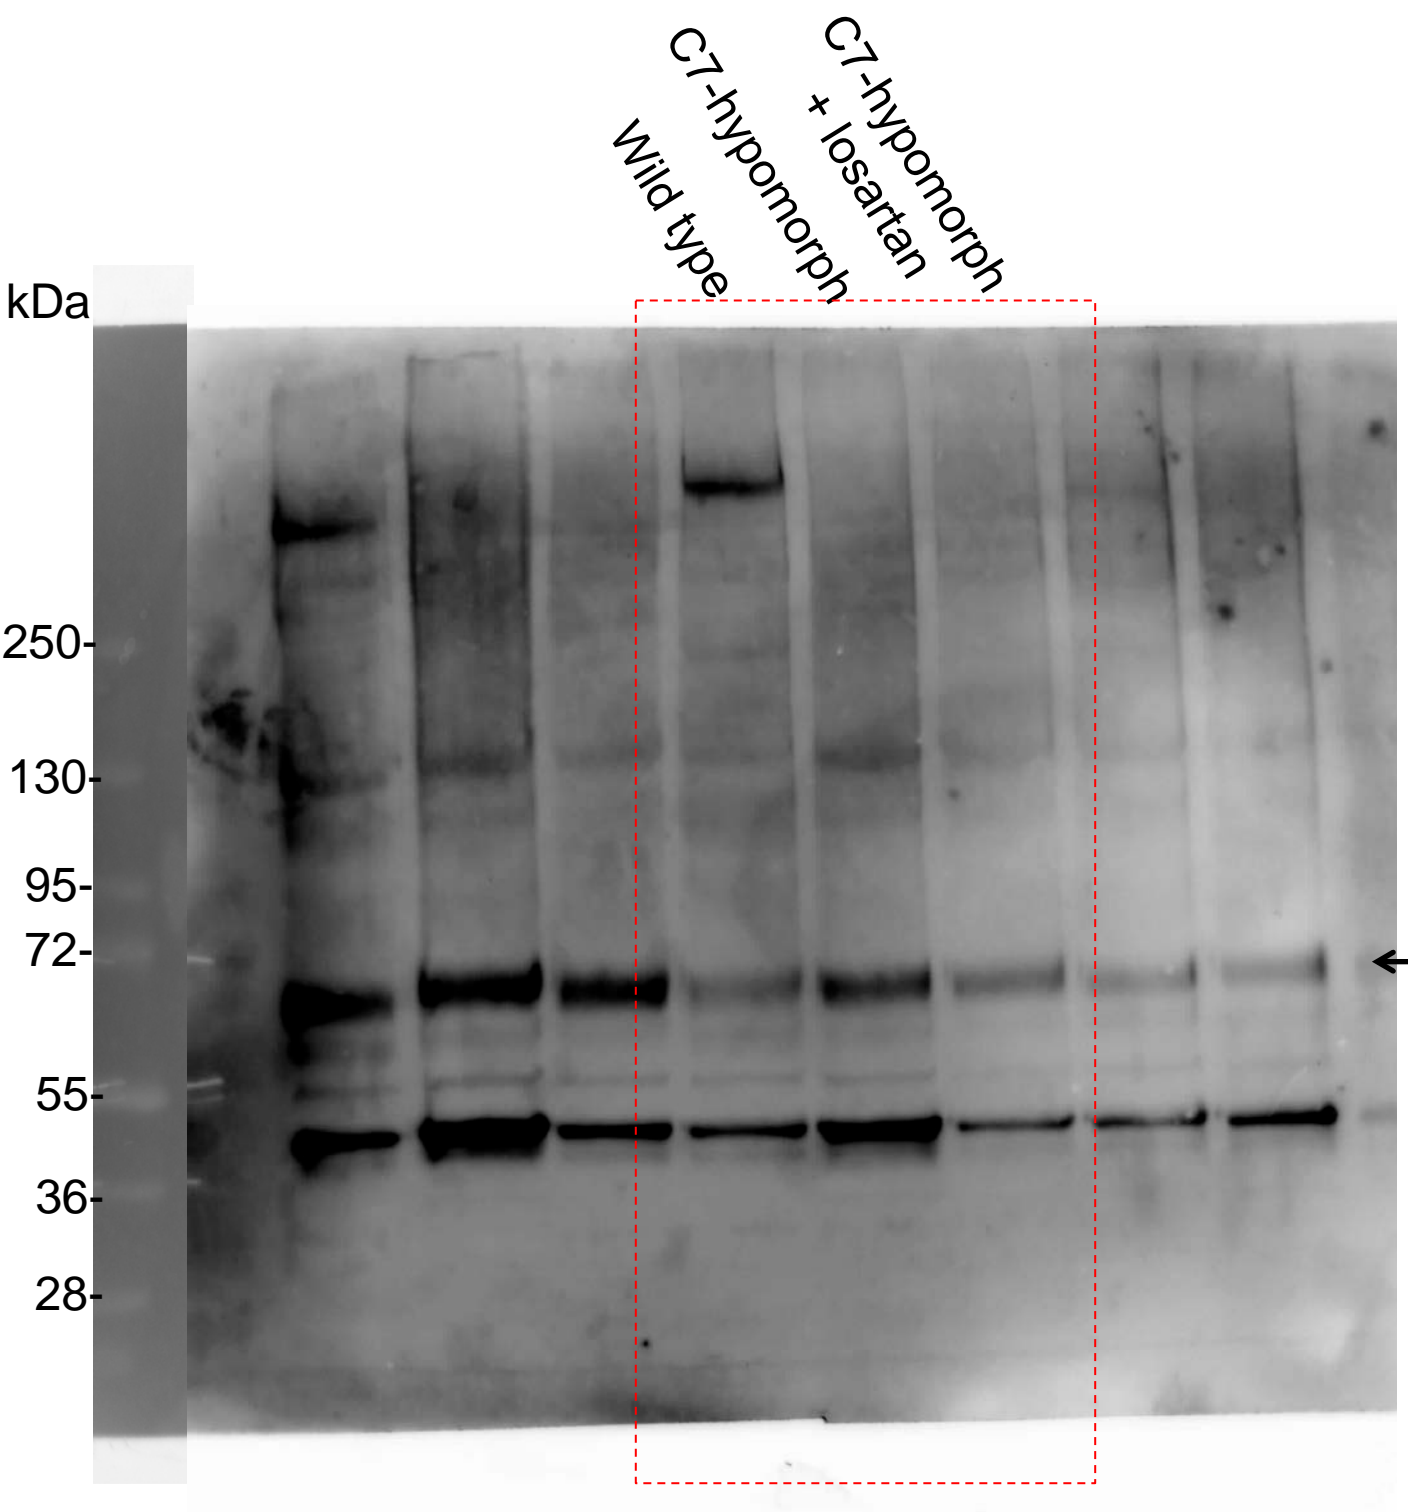

**Figure 5A. Tgfbr2**

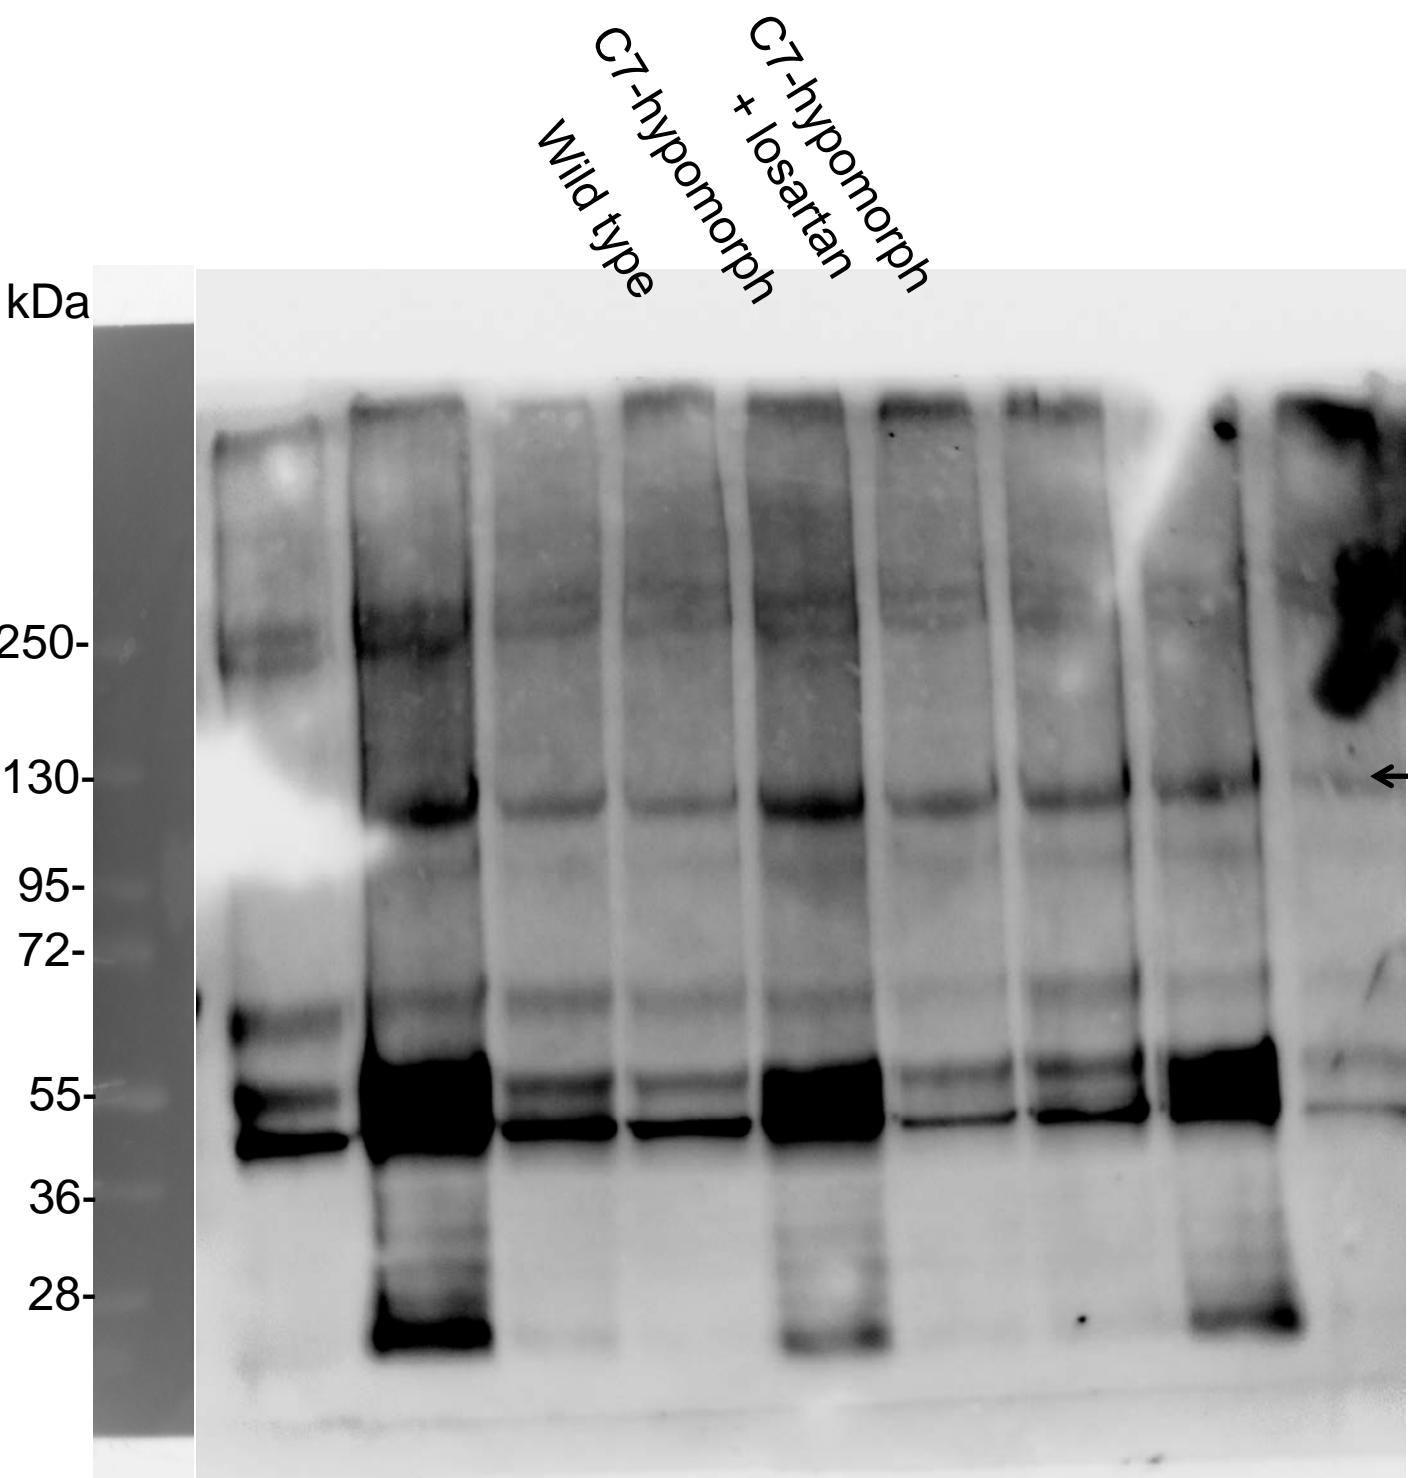

**Figure 5A.** Tsp1

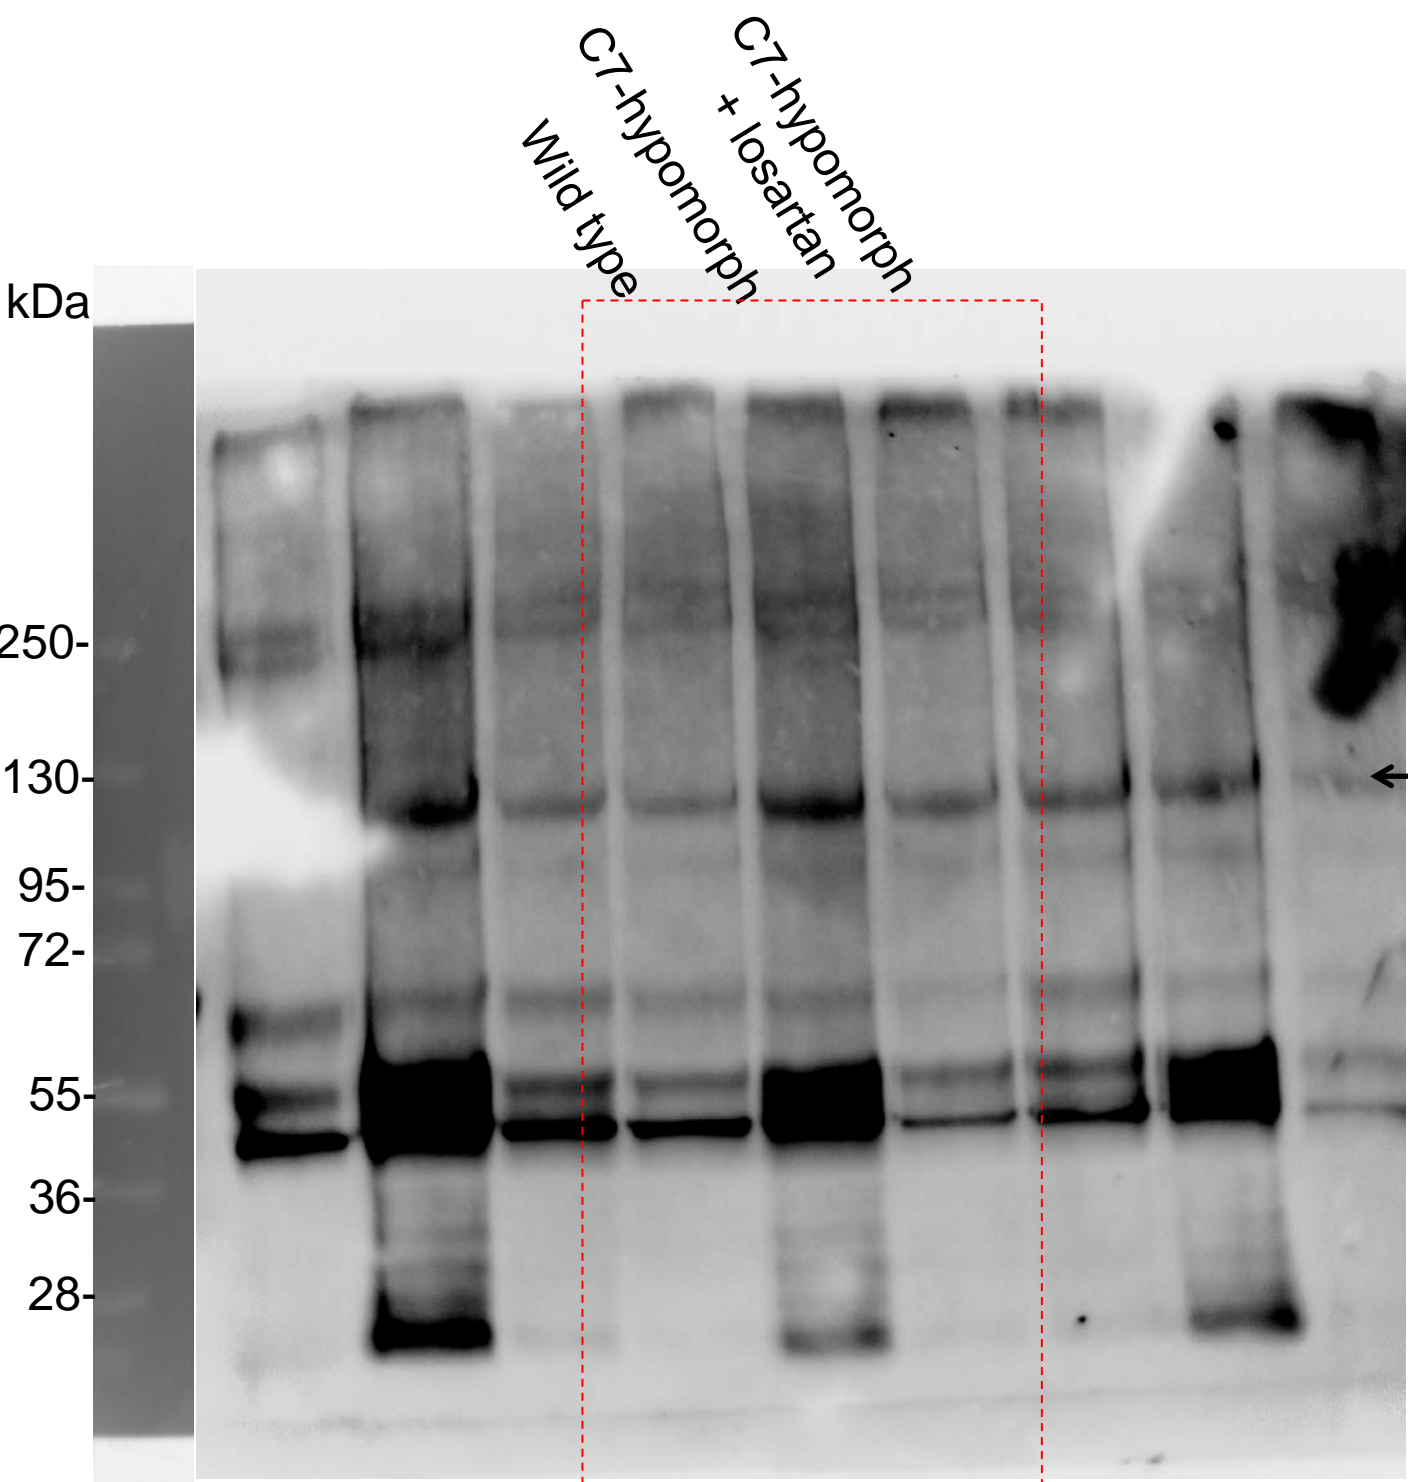

**Figure 5A.** Tsp1

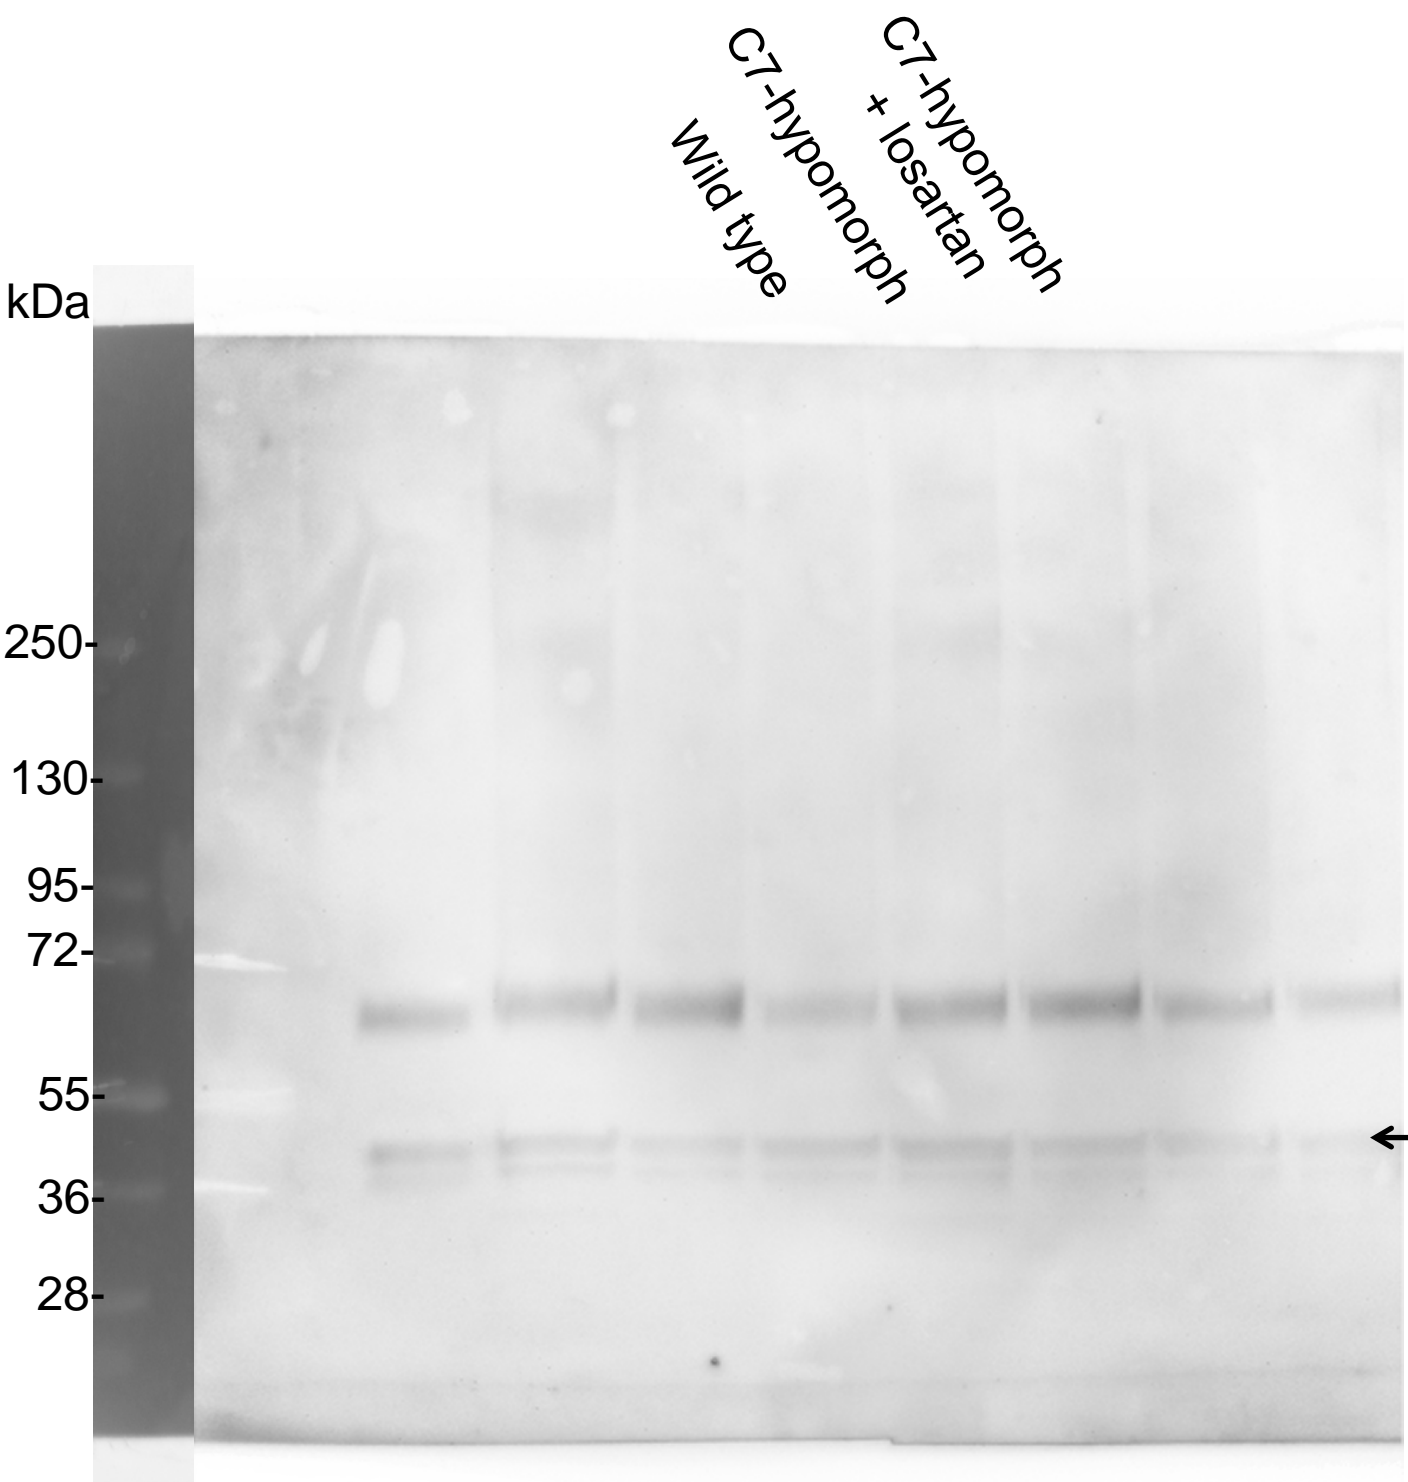

**Figure 5A.** Erk1/2

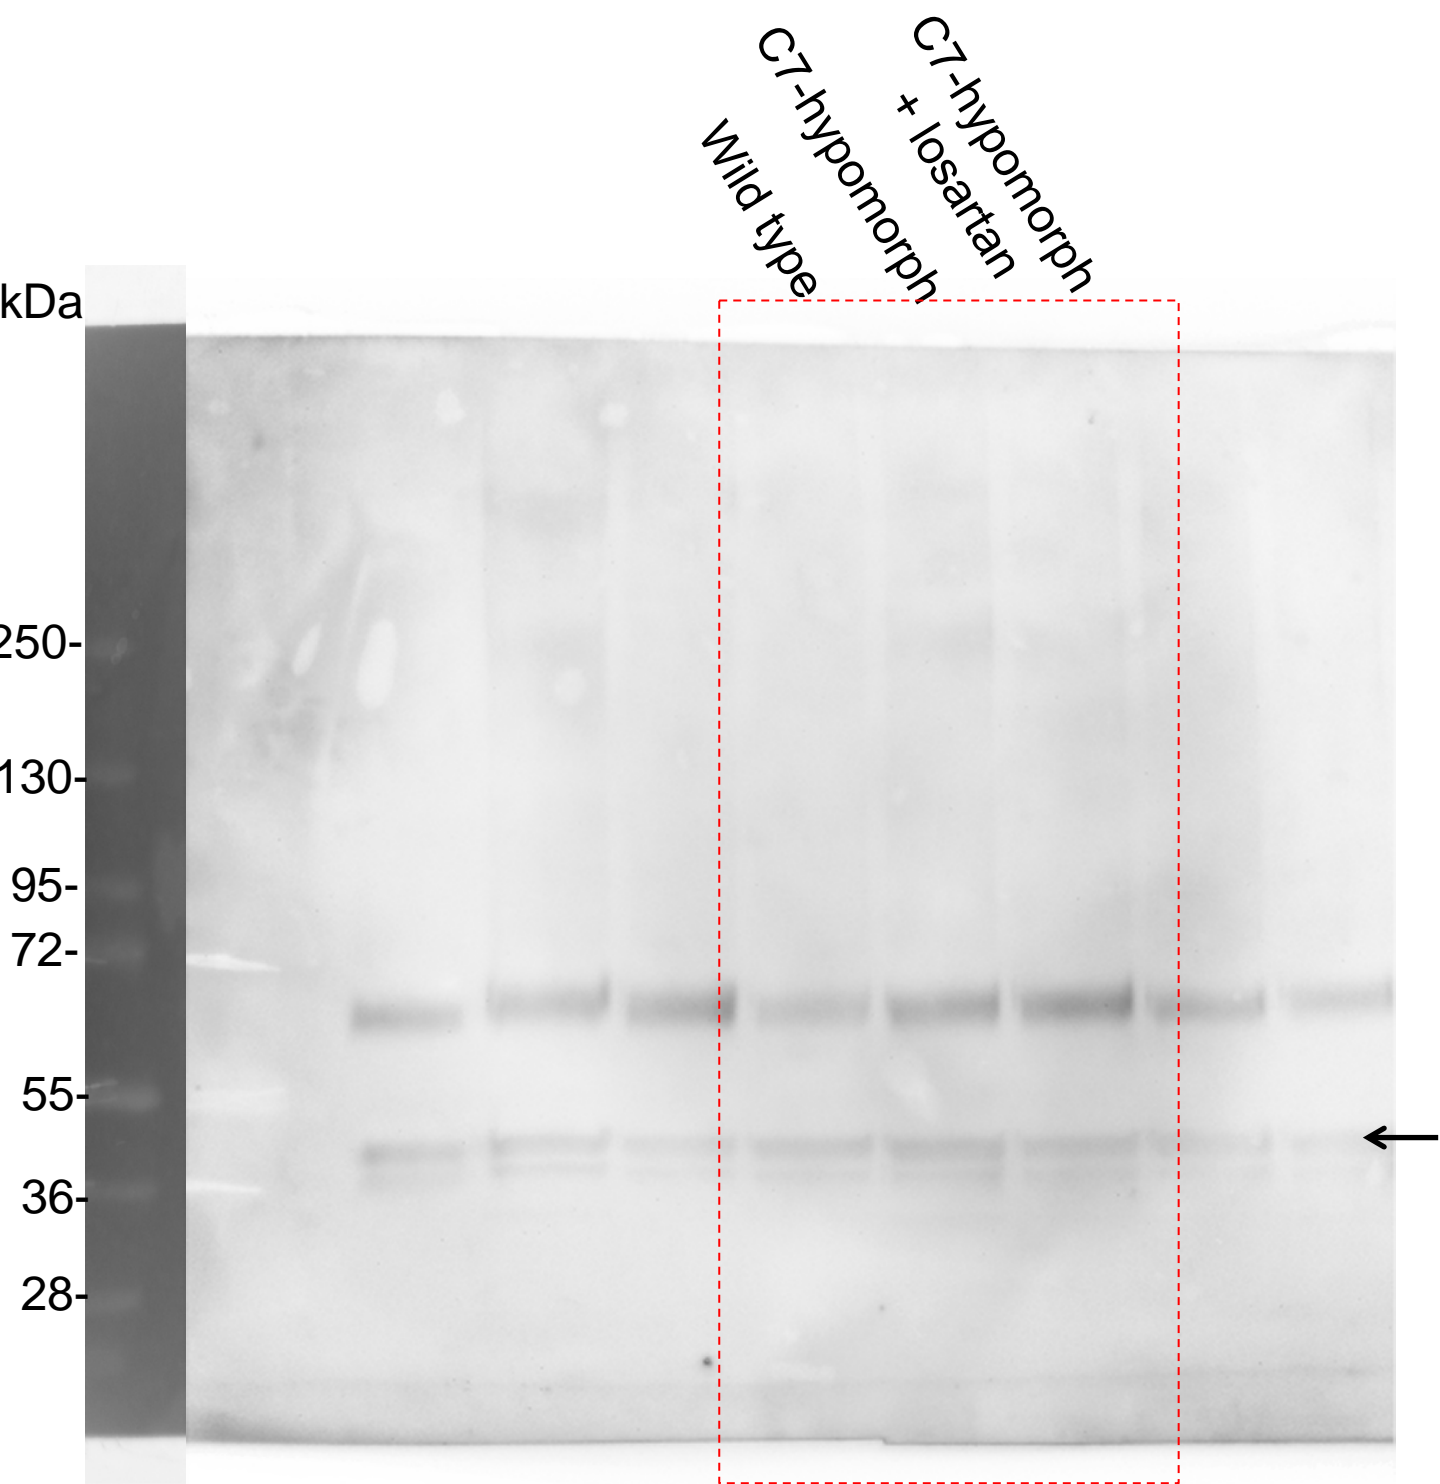

**Figure 5A.** Erk1/2



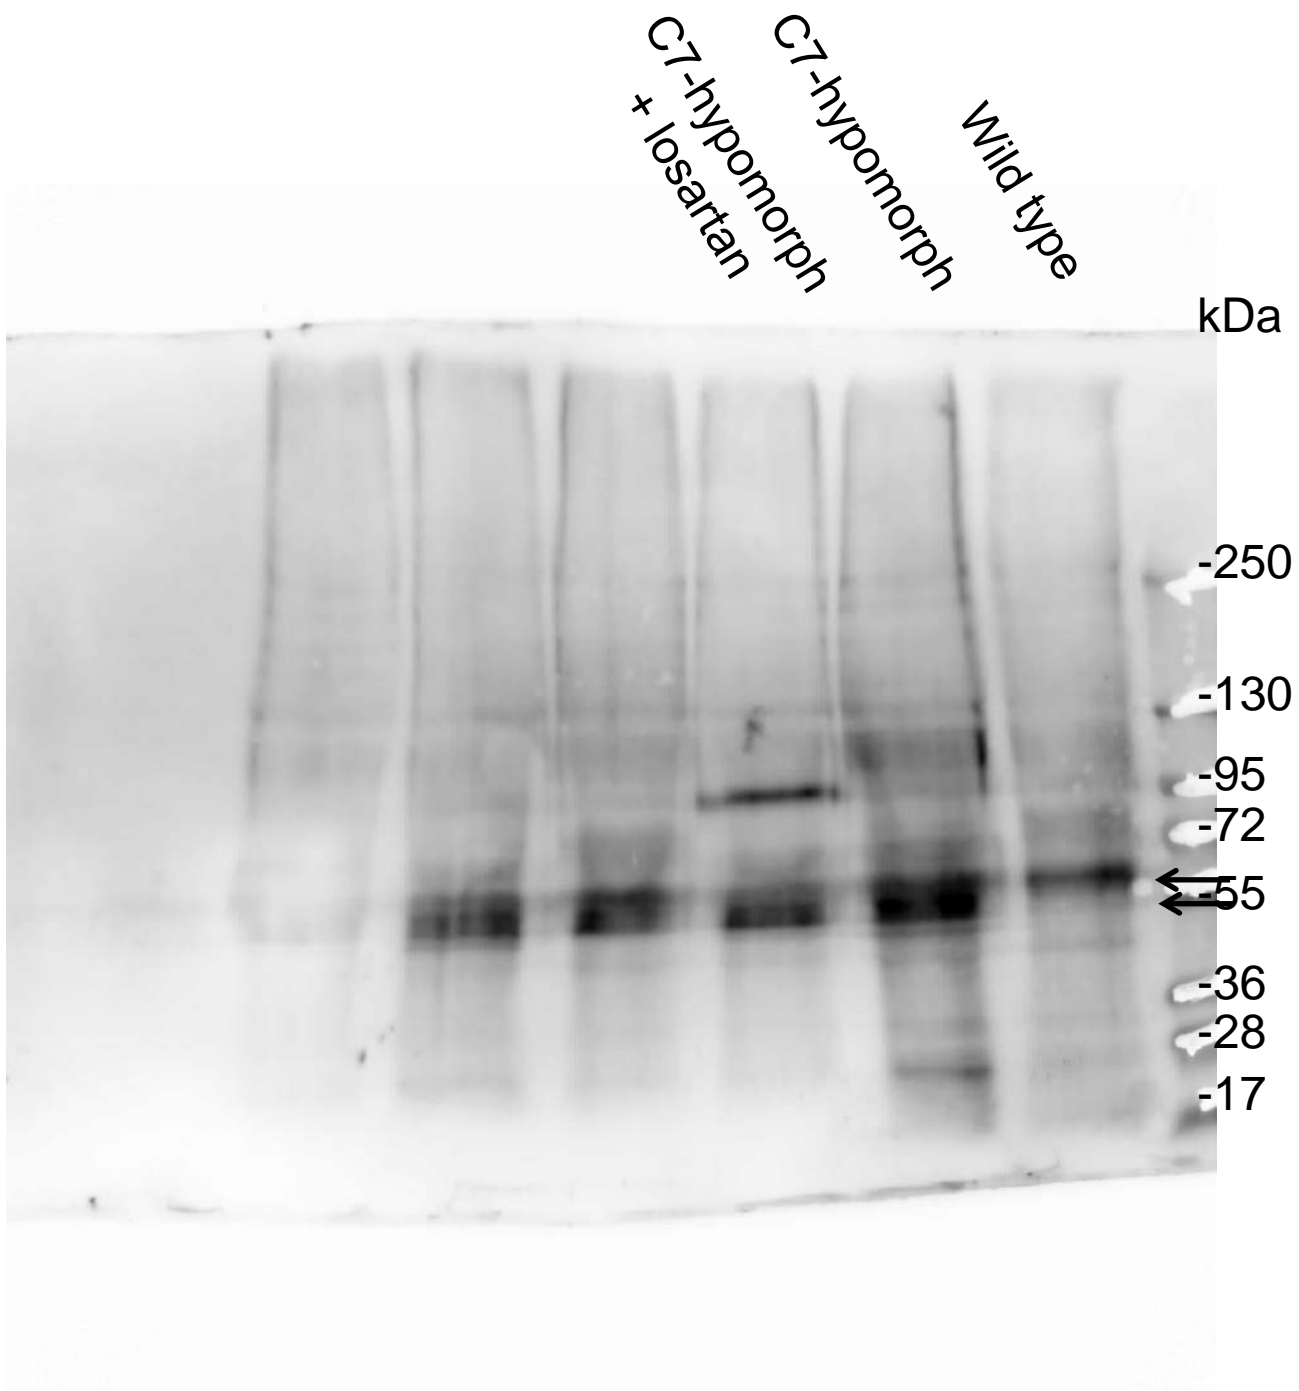

**Figure 5A.** P-Smad2/3

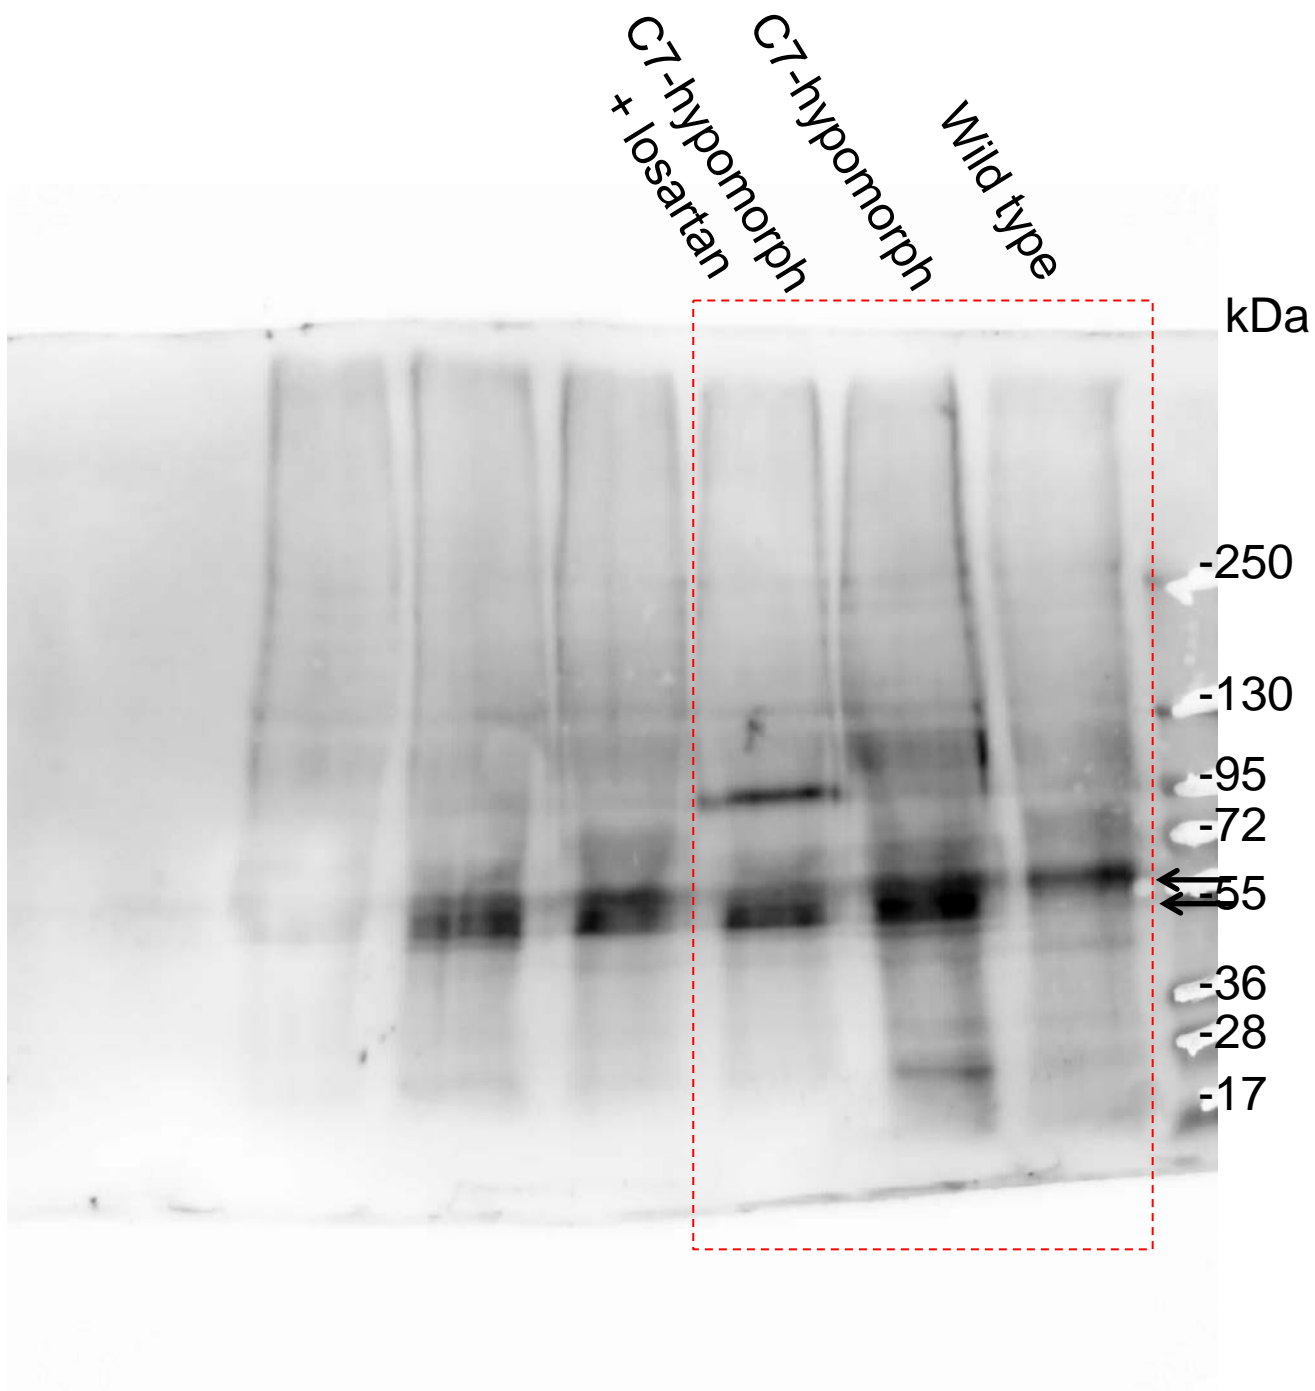

**Figure 5A.** P-Smad2/3

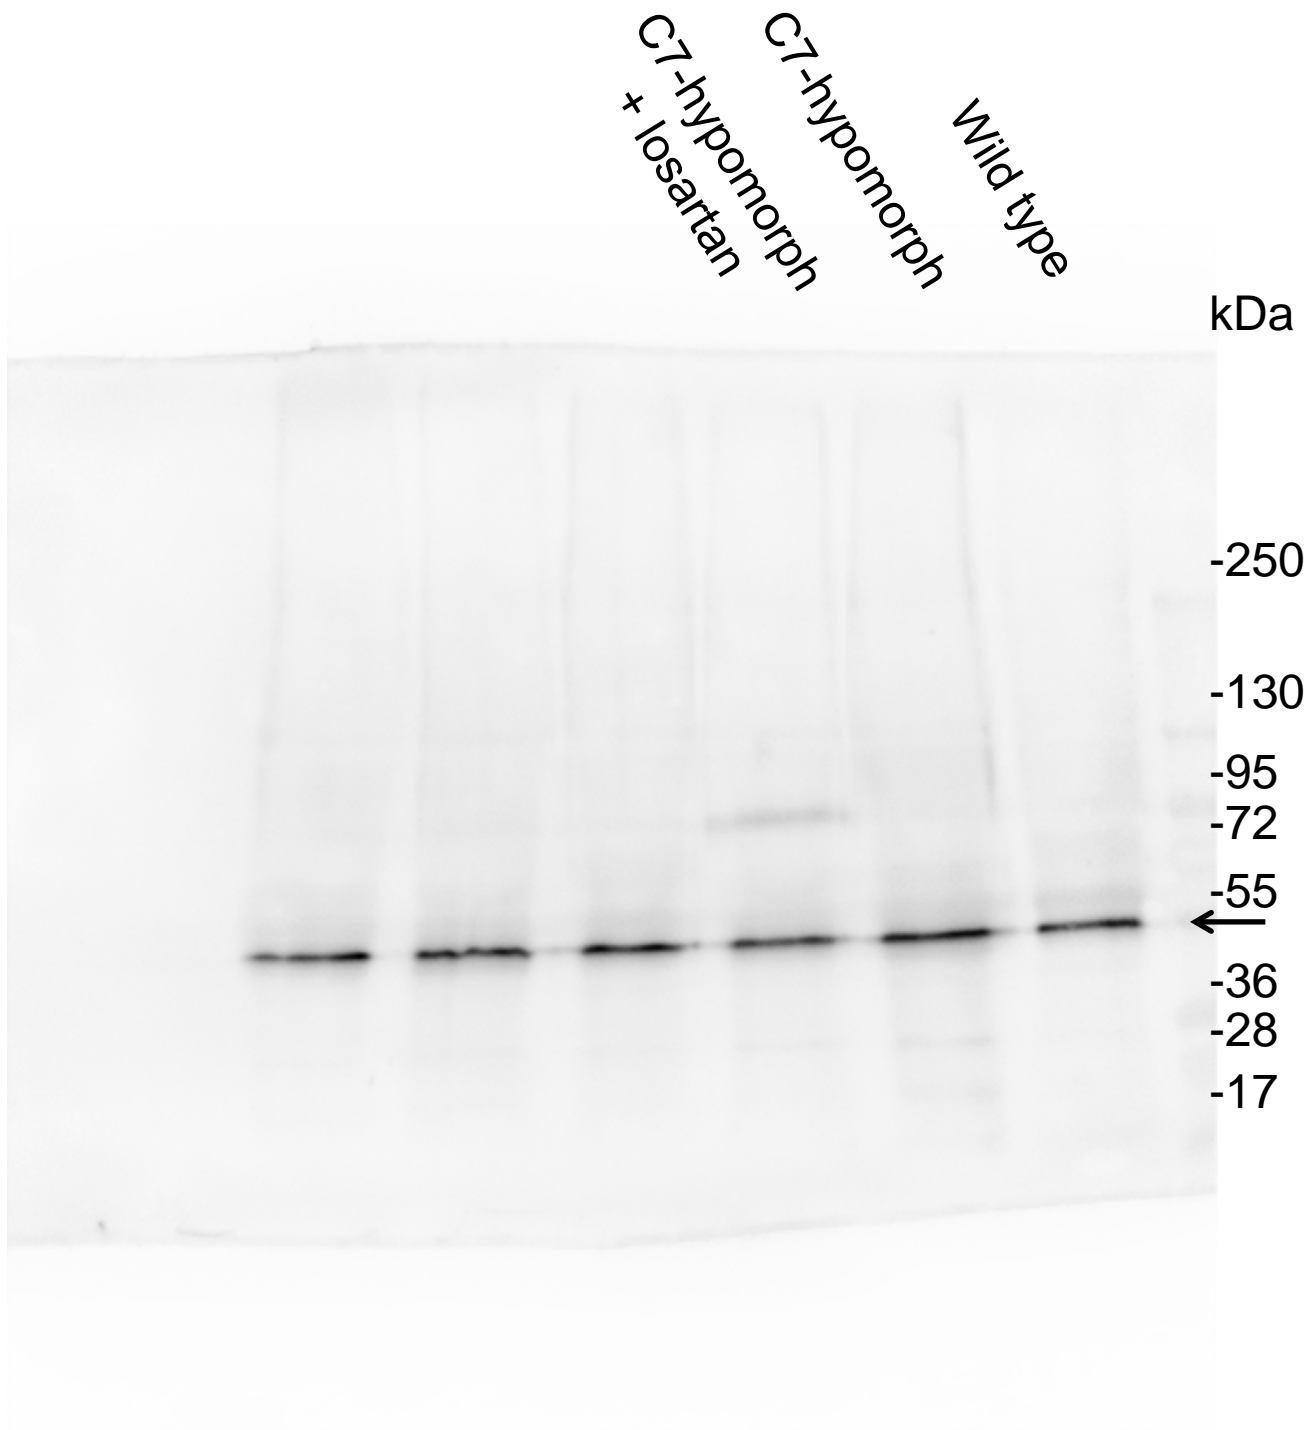

**Figure 5A.**  $\beta$ -tubulin

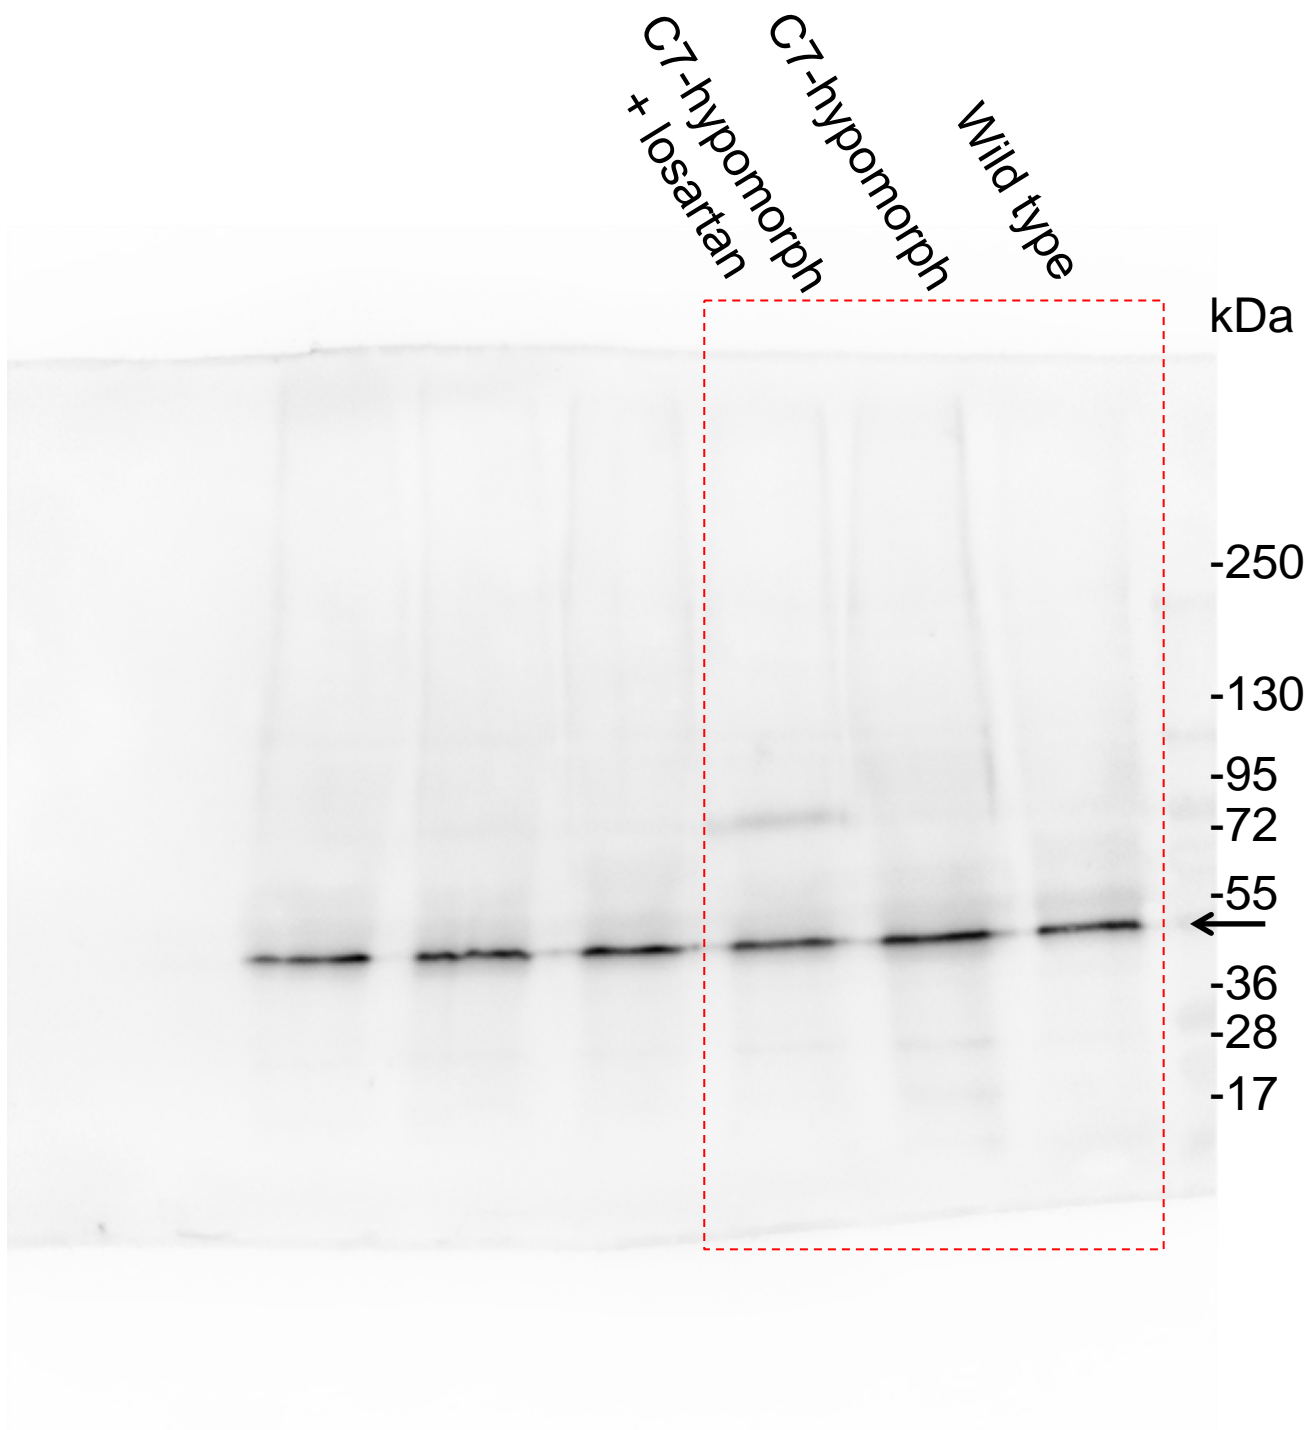

**Figure 5A.**  $\beta$ -tubulin

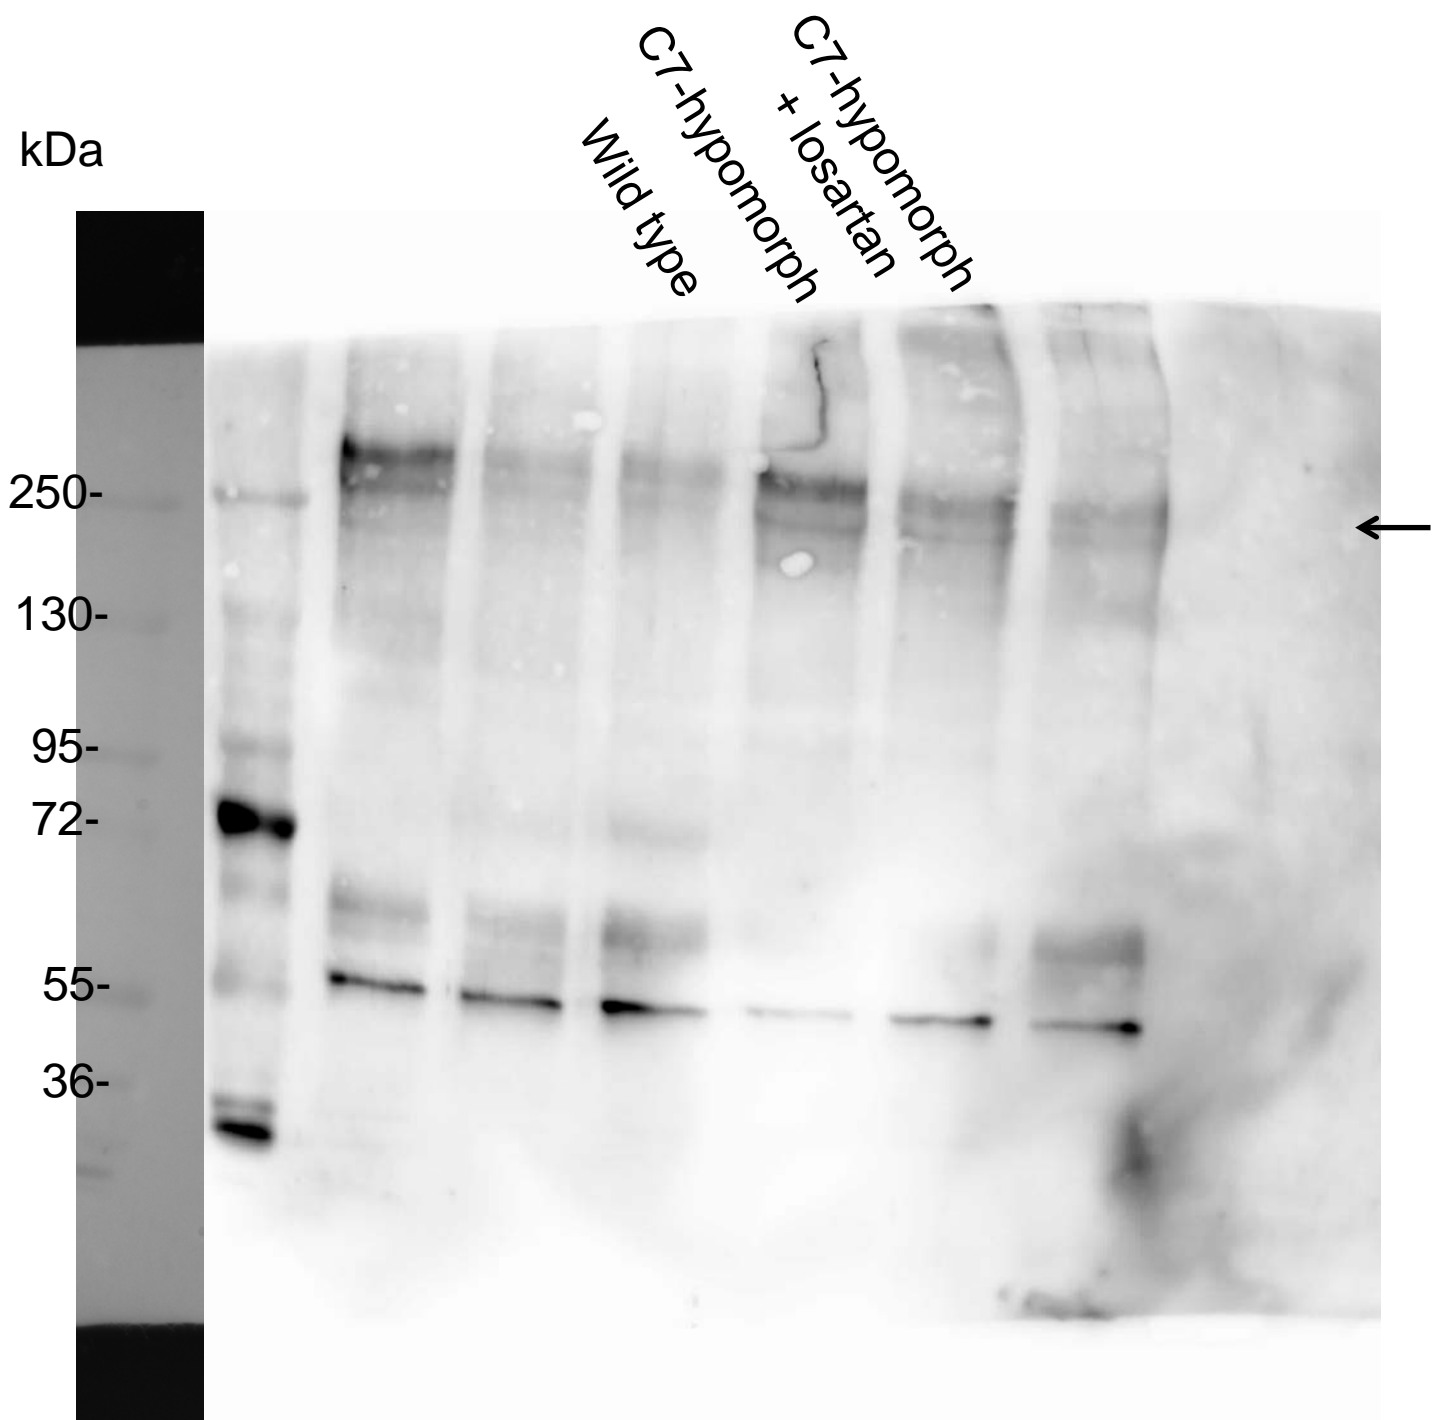

**Figure 5A.** Fibronectin

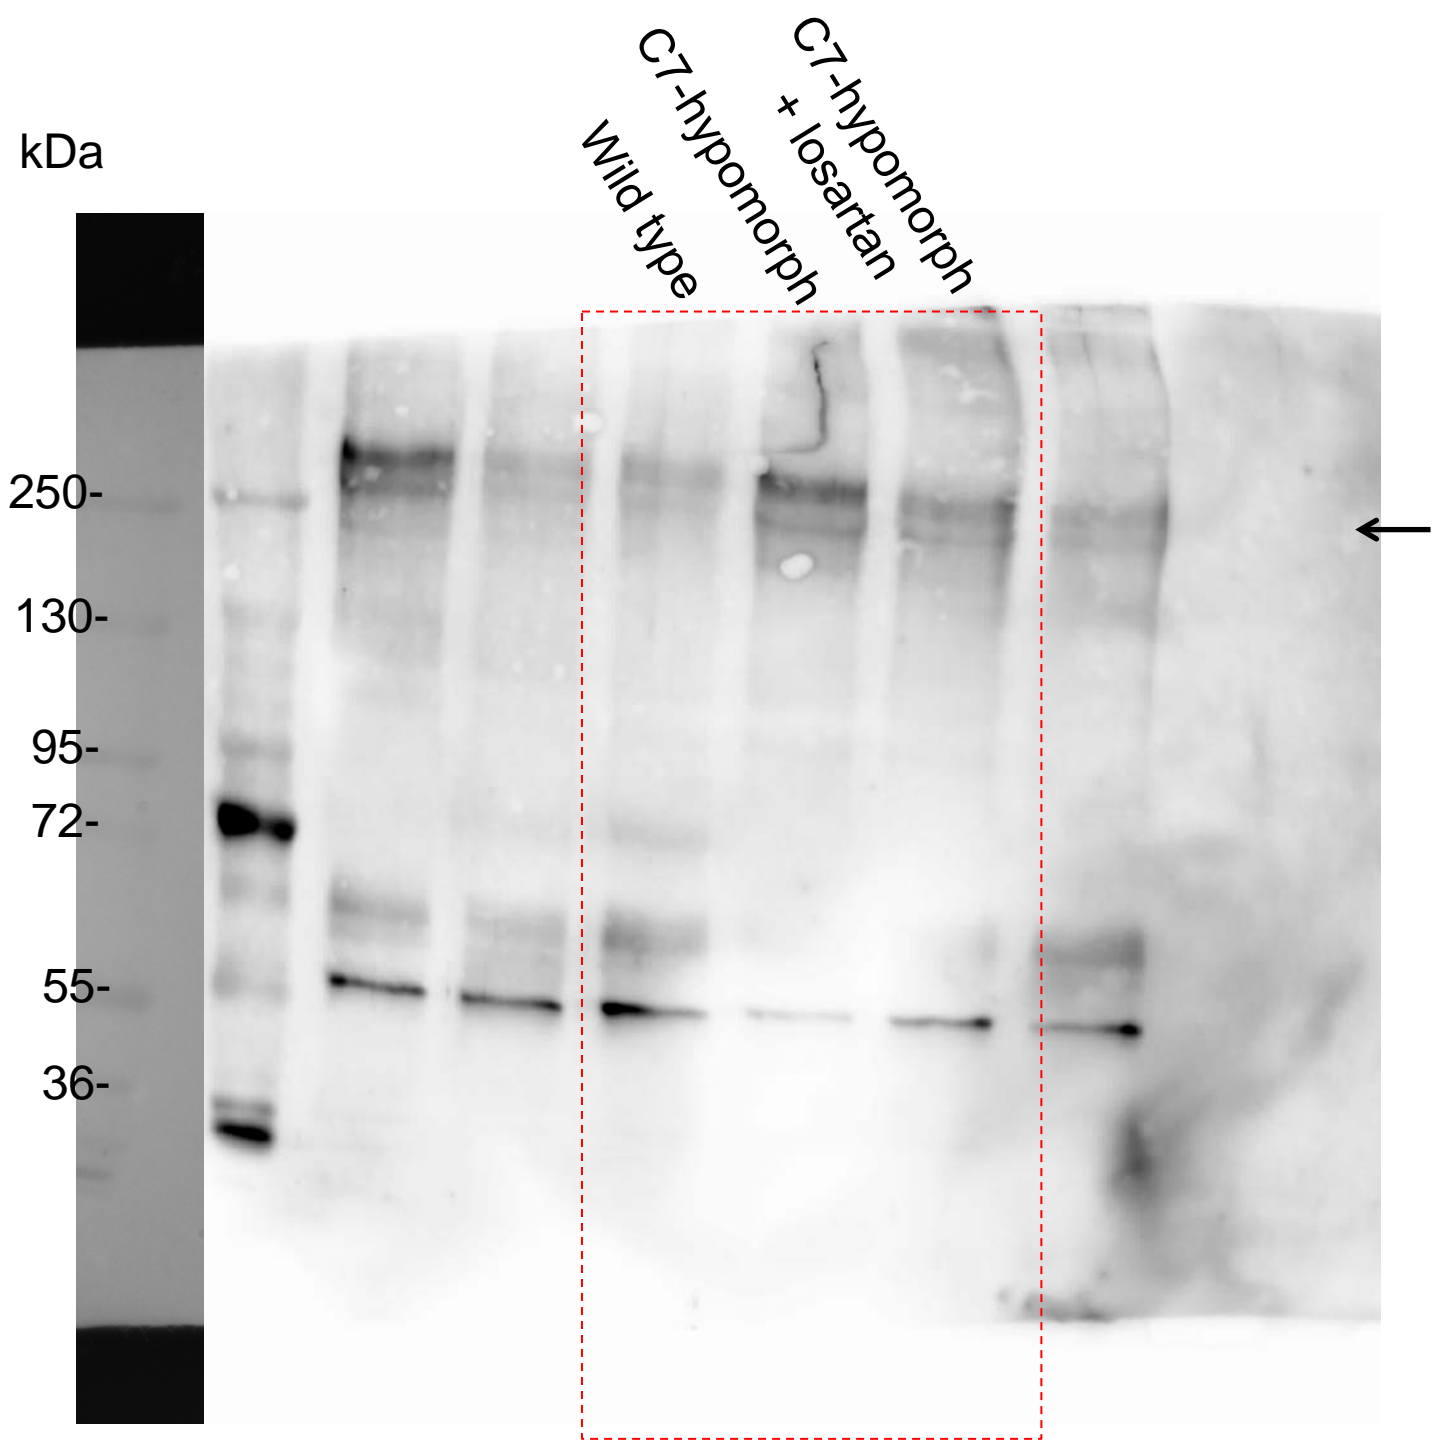

**Figure 5A.** Fibronectin

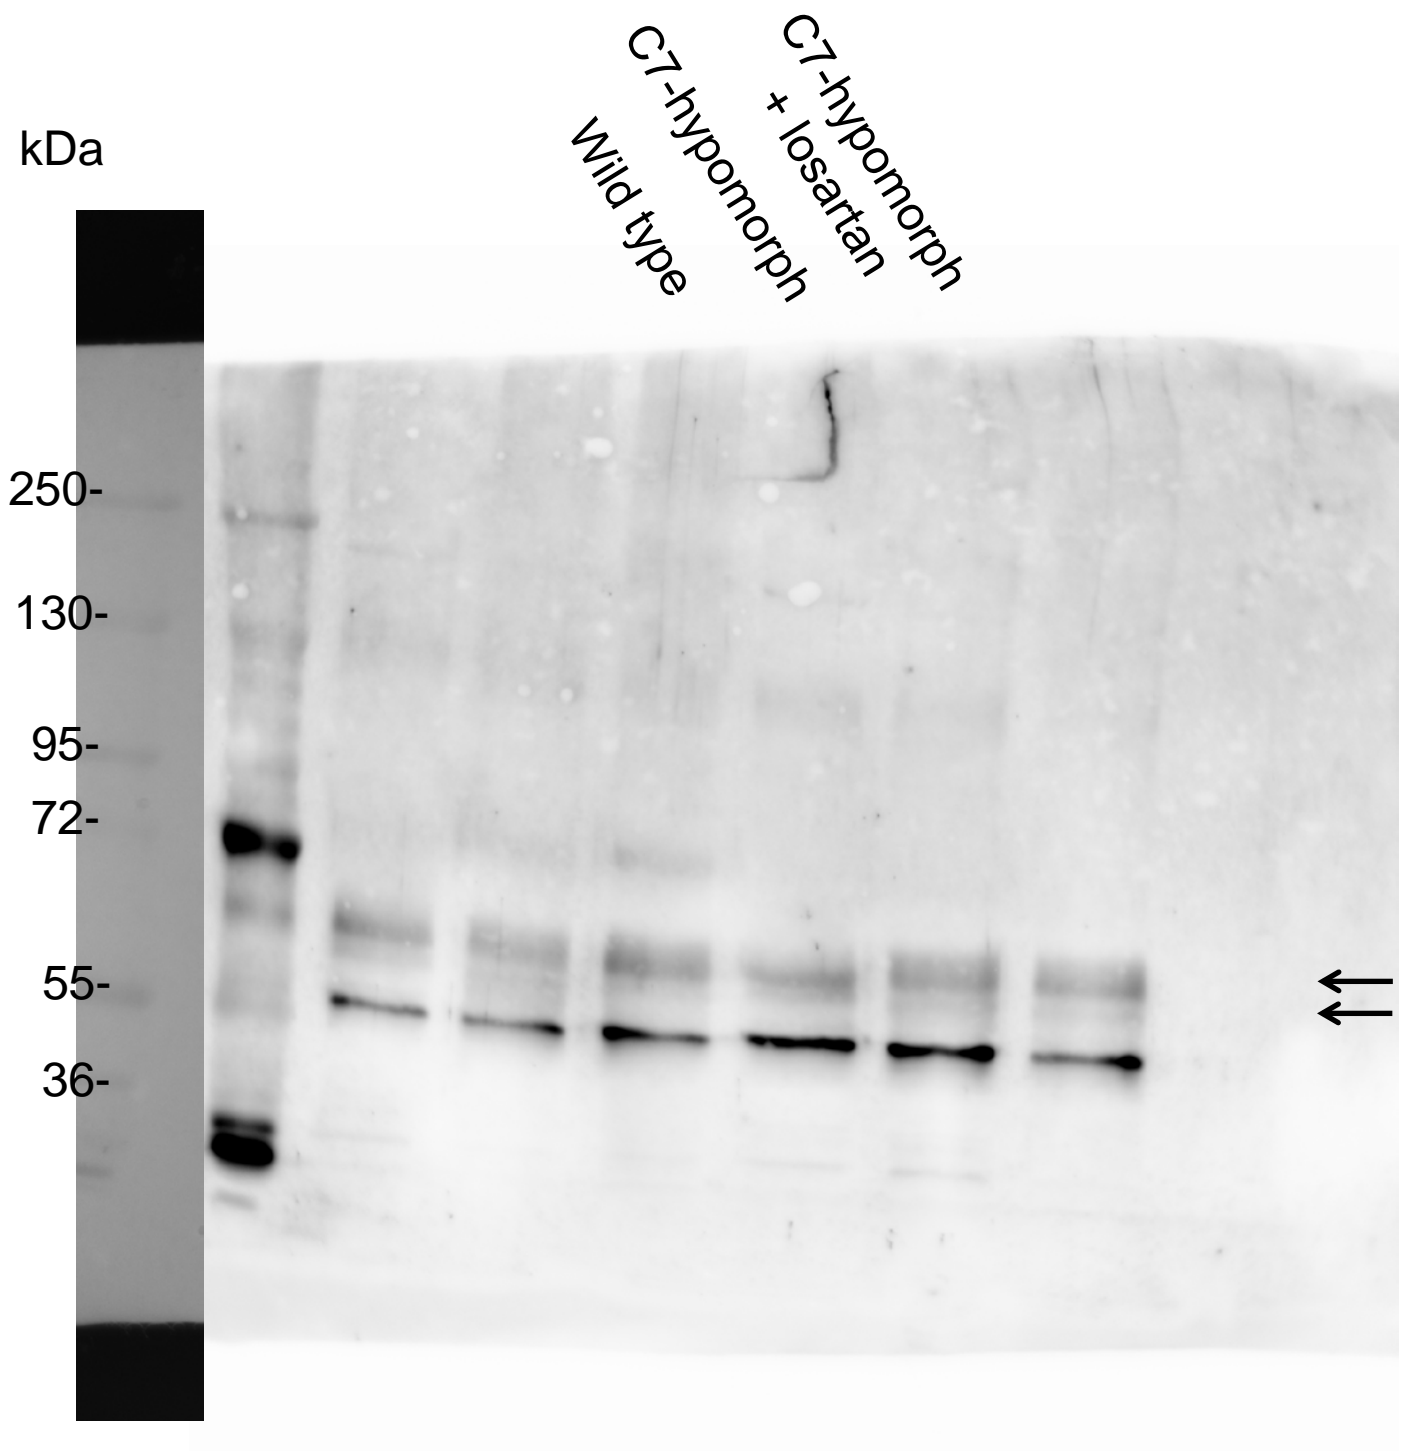

**Figure 5A.** Smad2/3

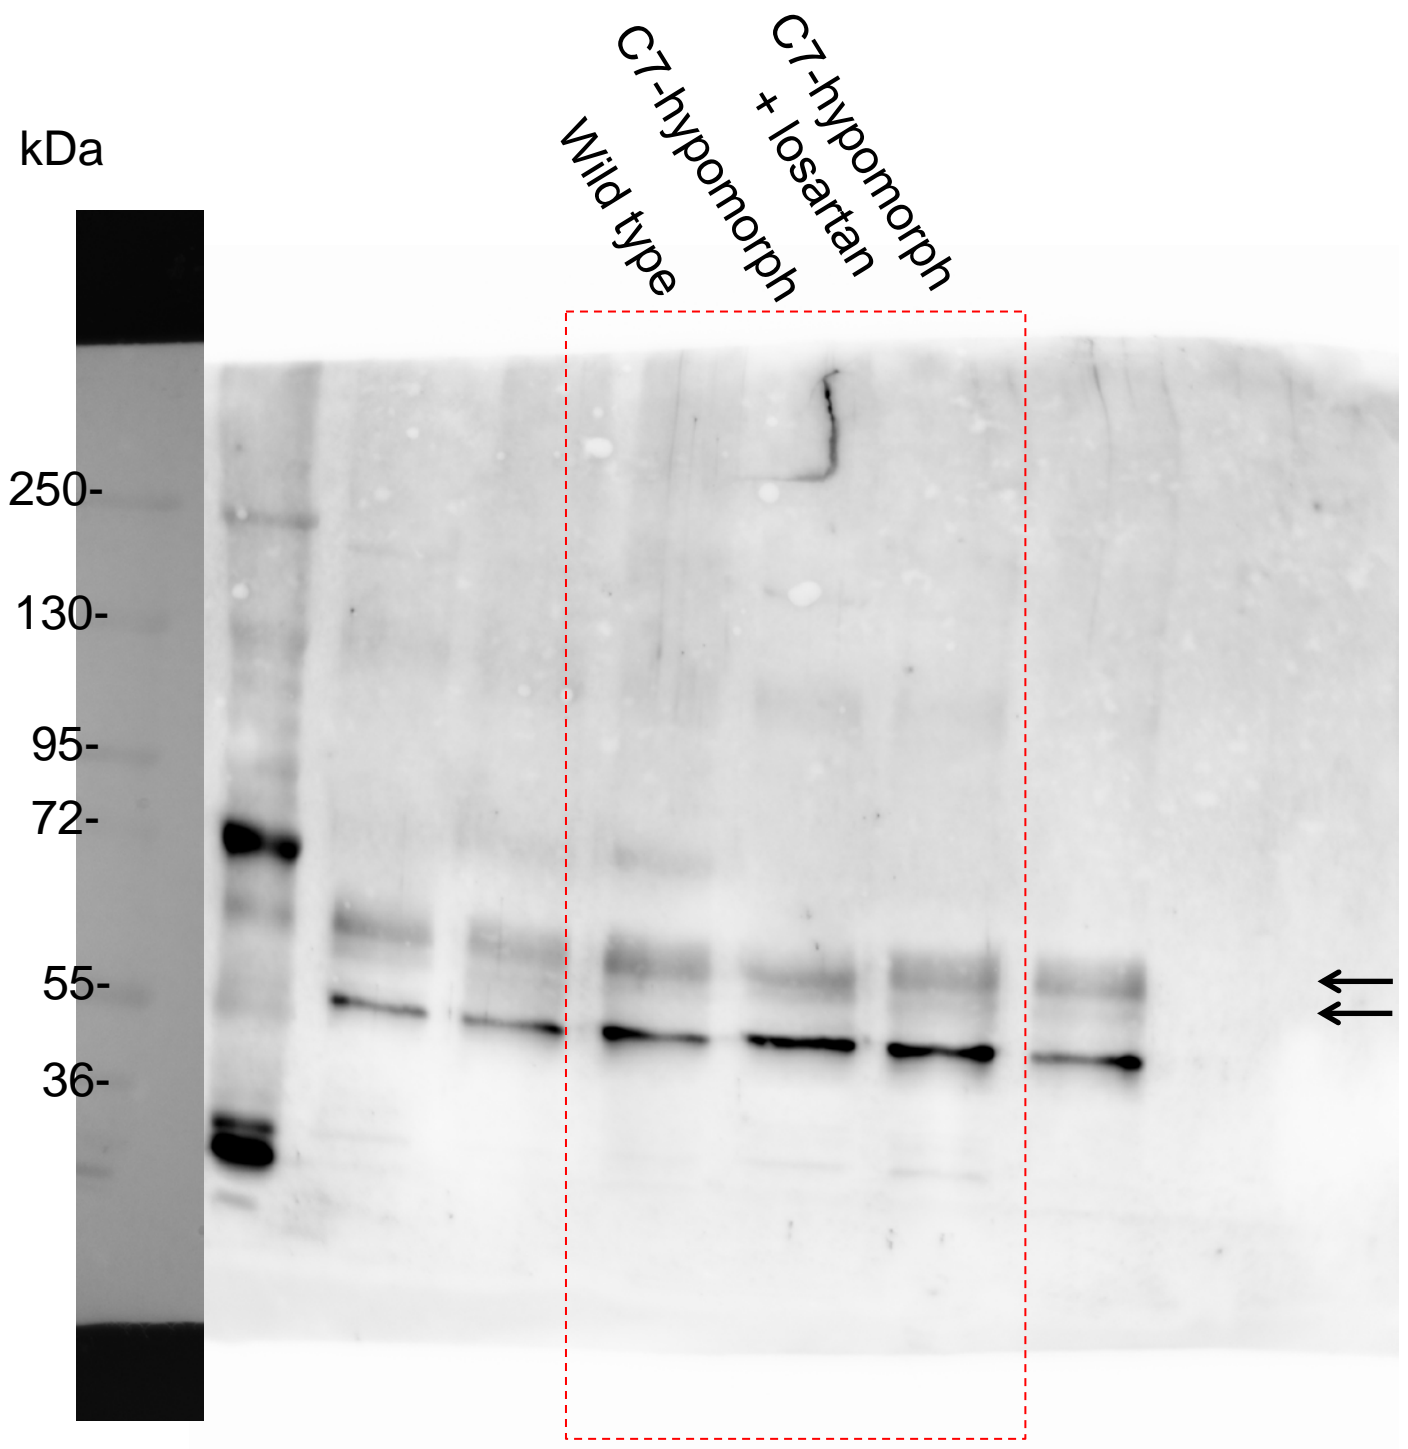

**Figure 5A.** Smad2/3



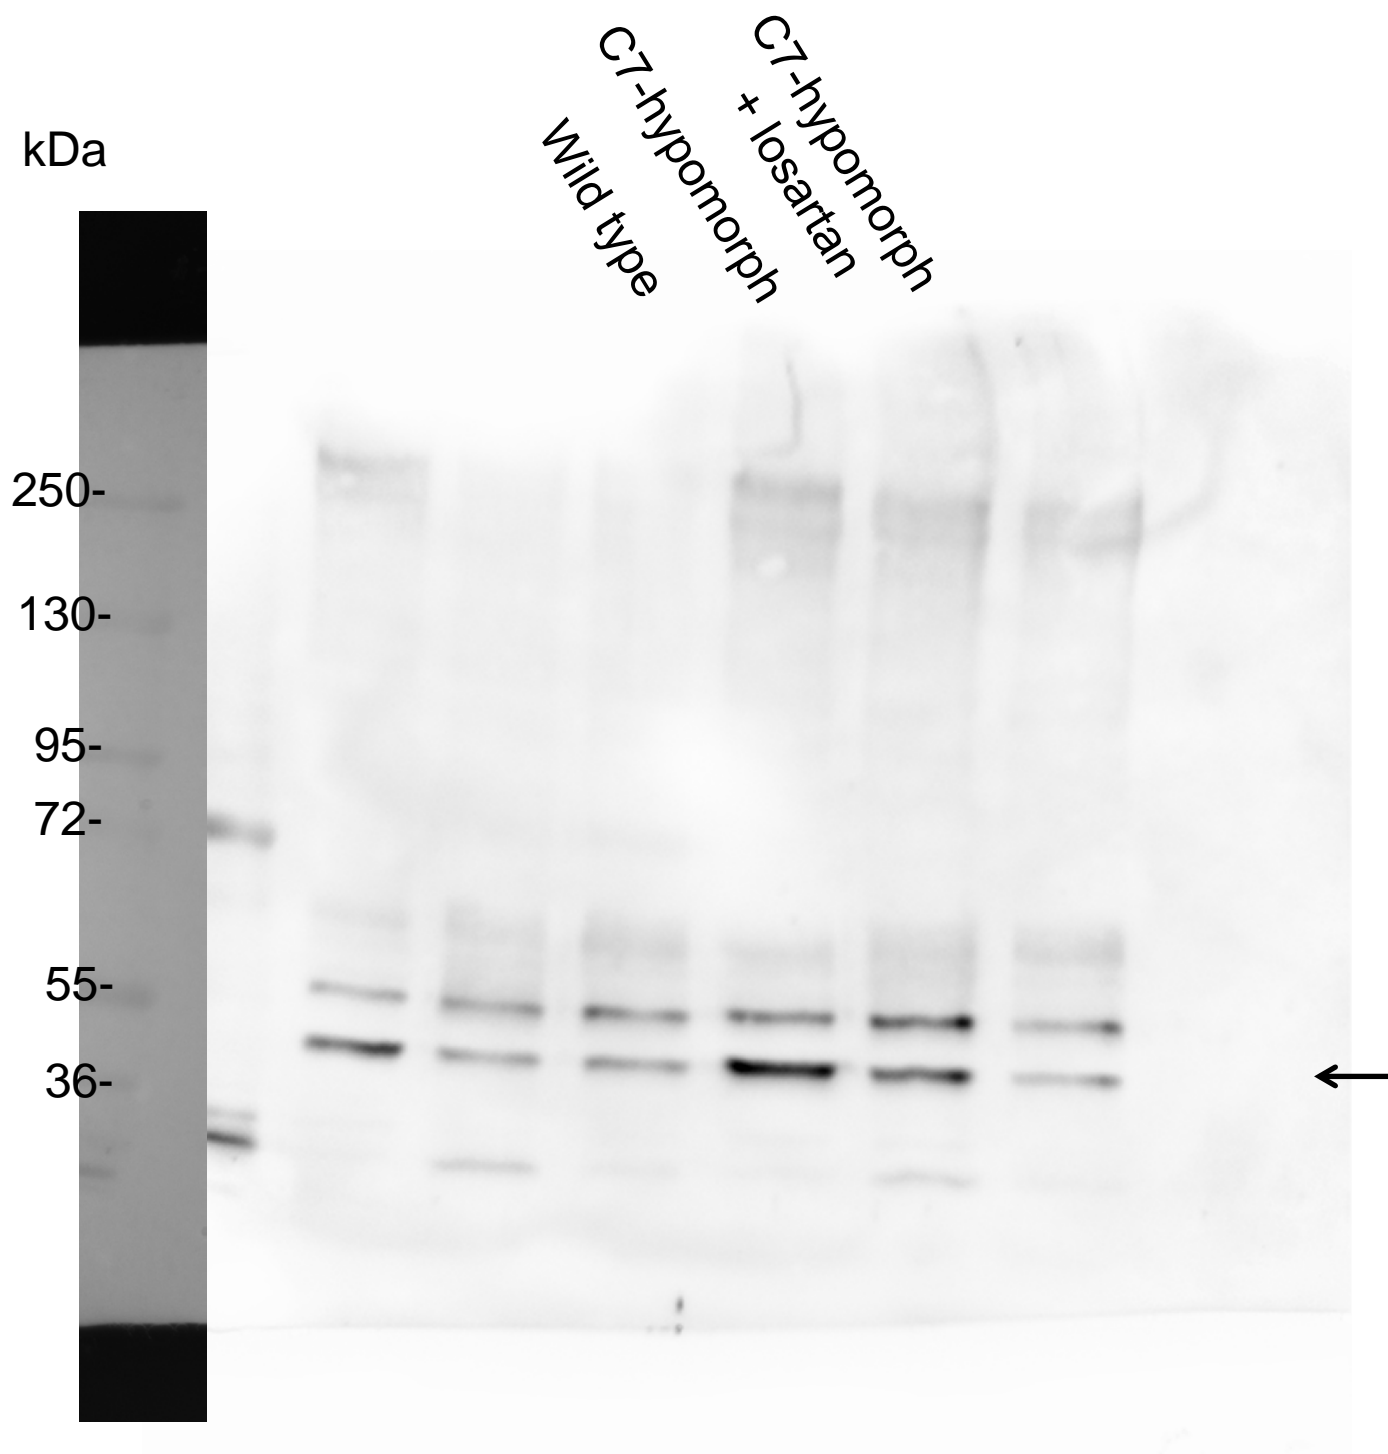

**Figure 5A.**  $\alpha$ Sma

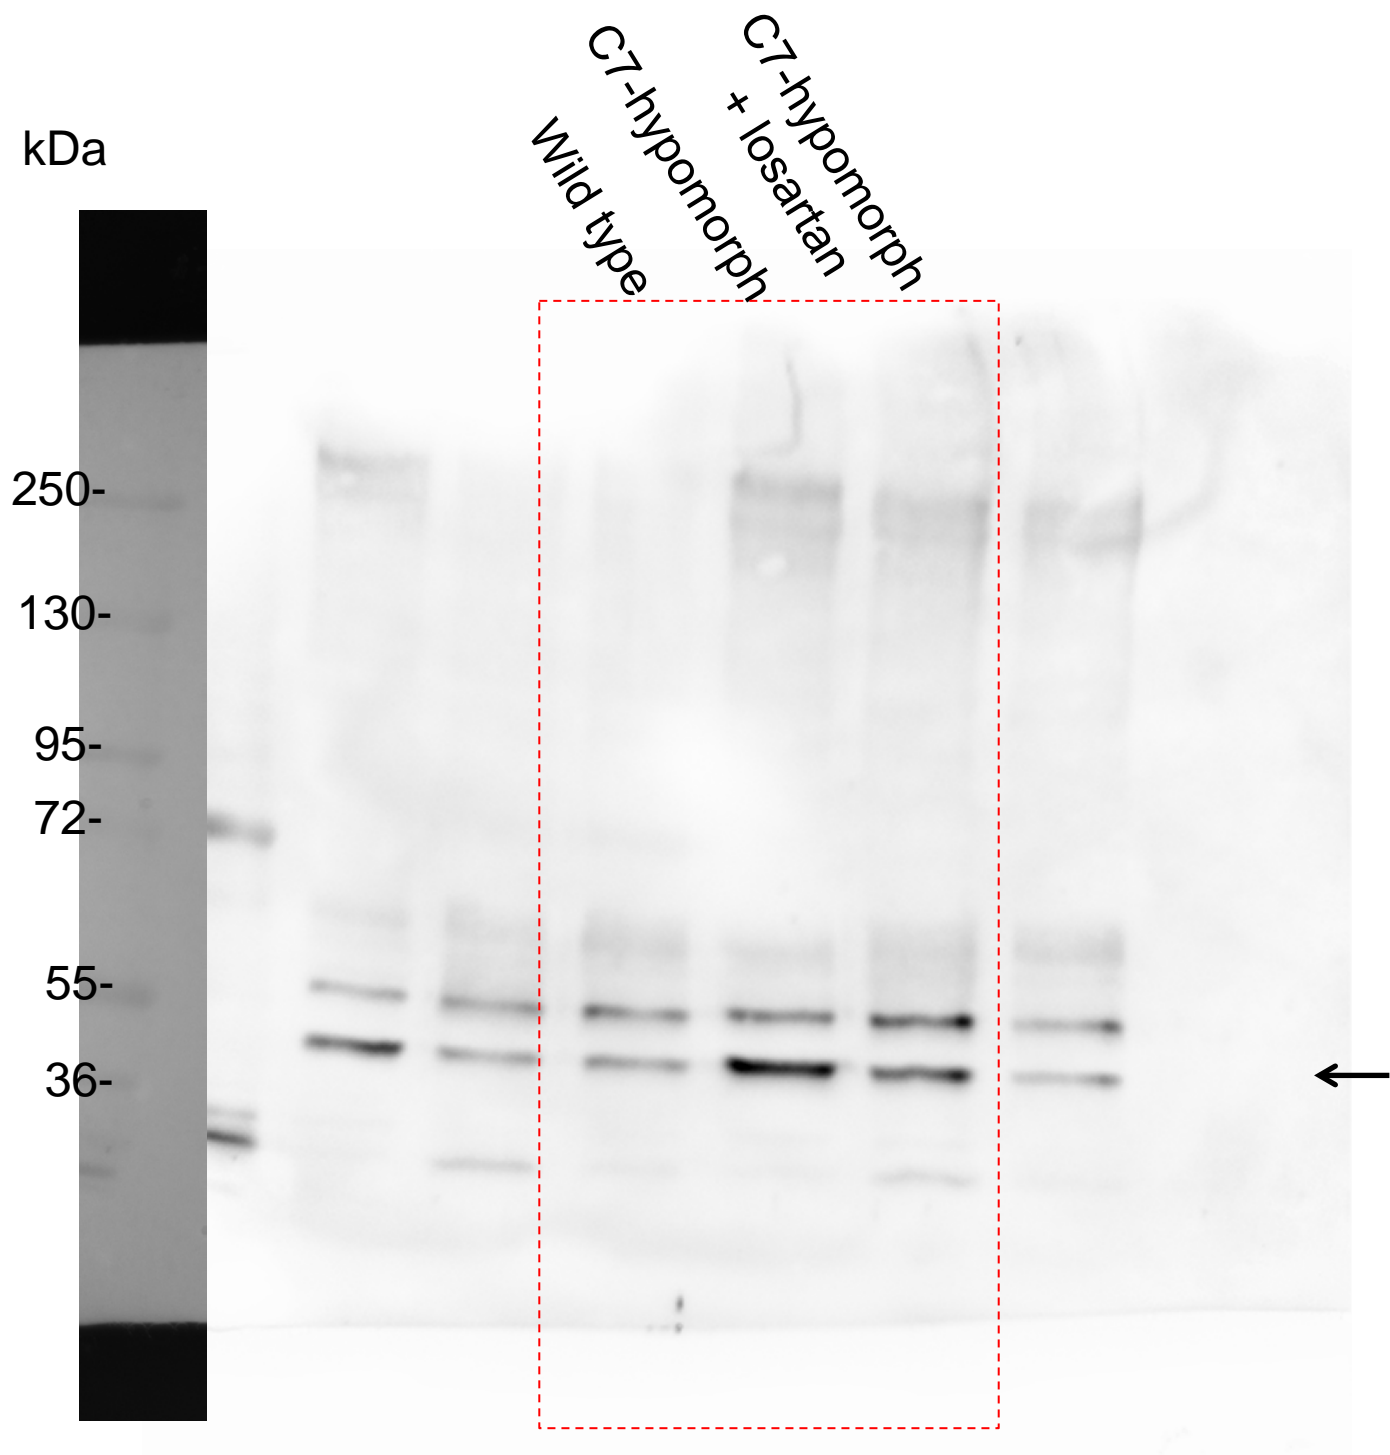

**Figure 5A.**  $\alpha$ Sma

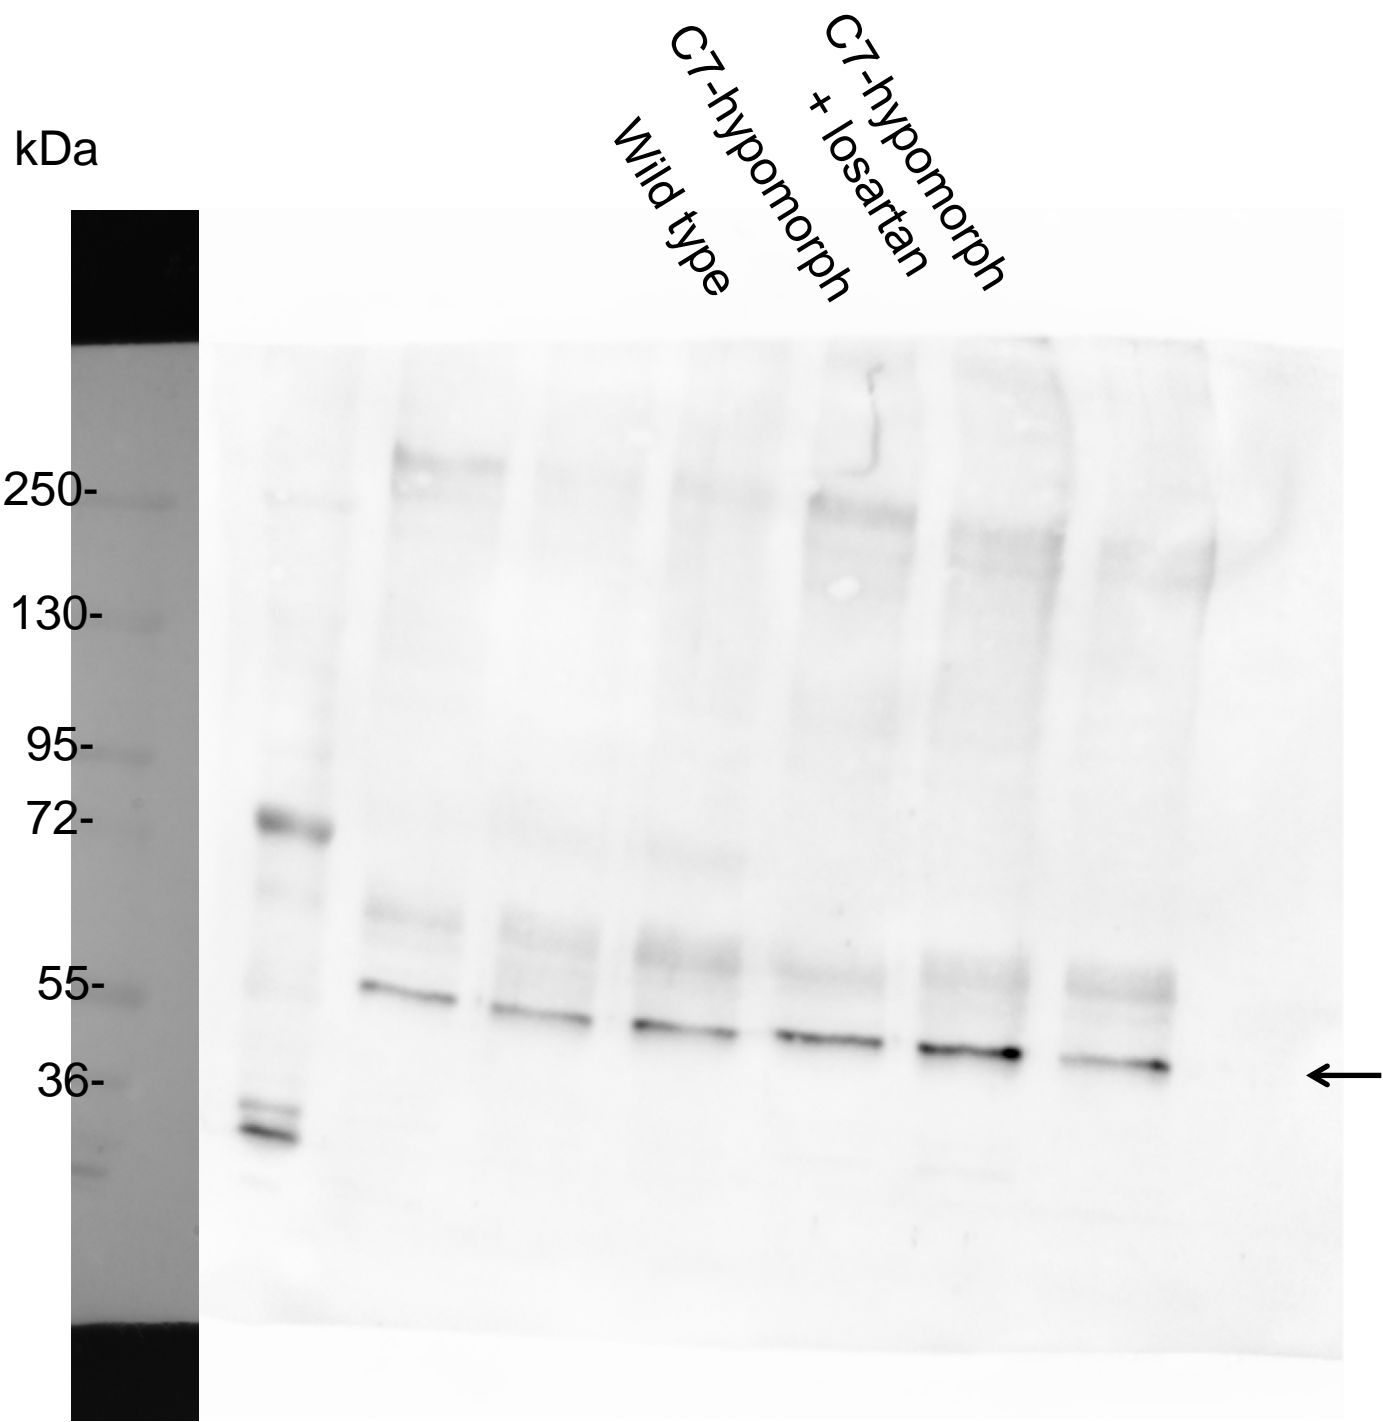

**Figure 5A.**  $\beta$ -tubulin

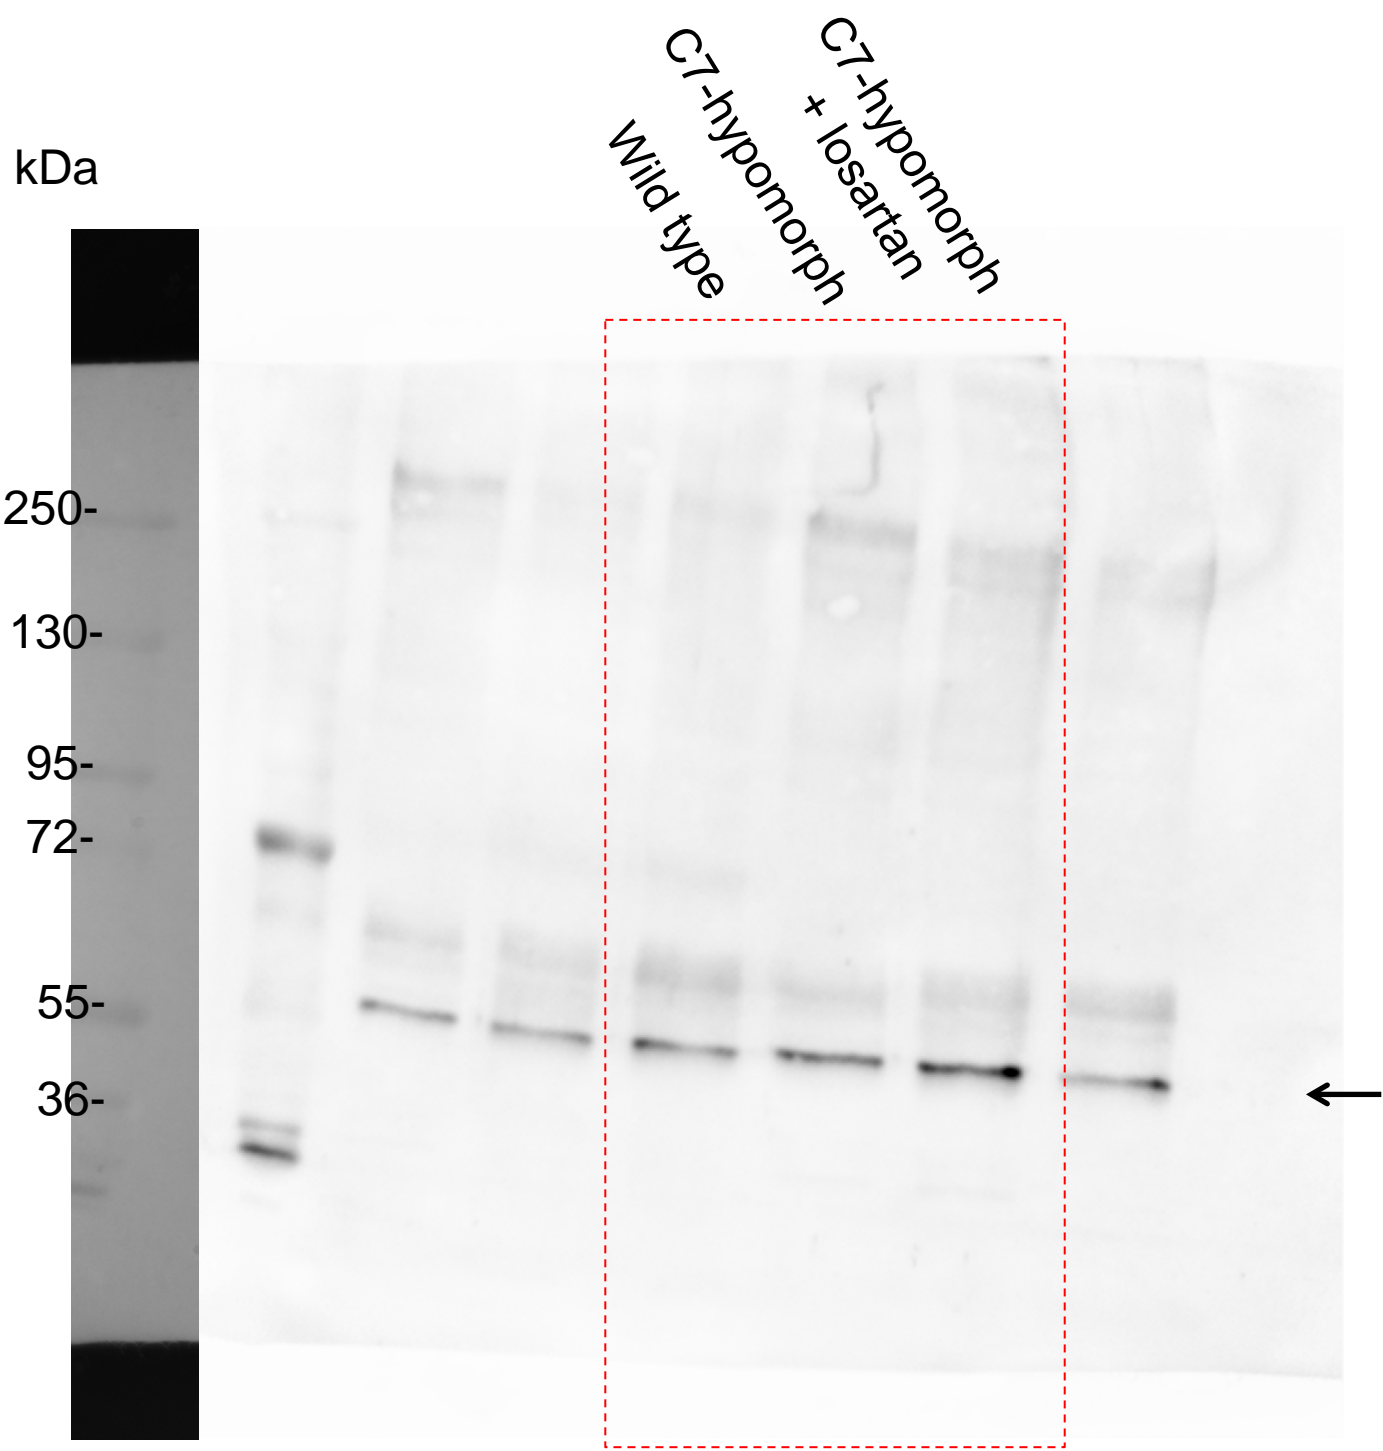

**Figure 5A.**  $\beta$ -tubulin

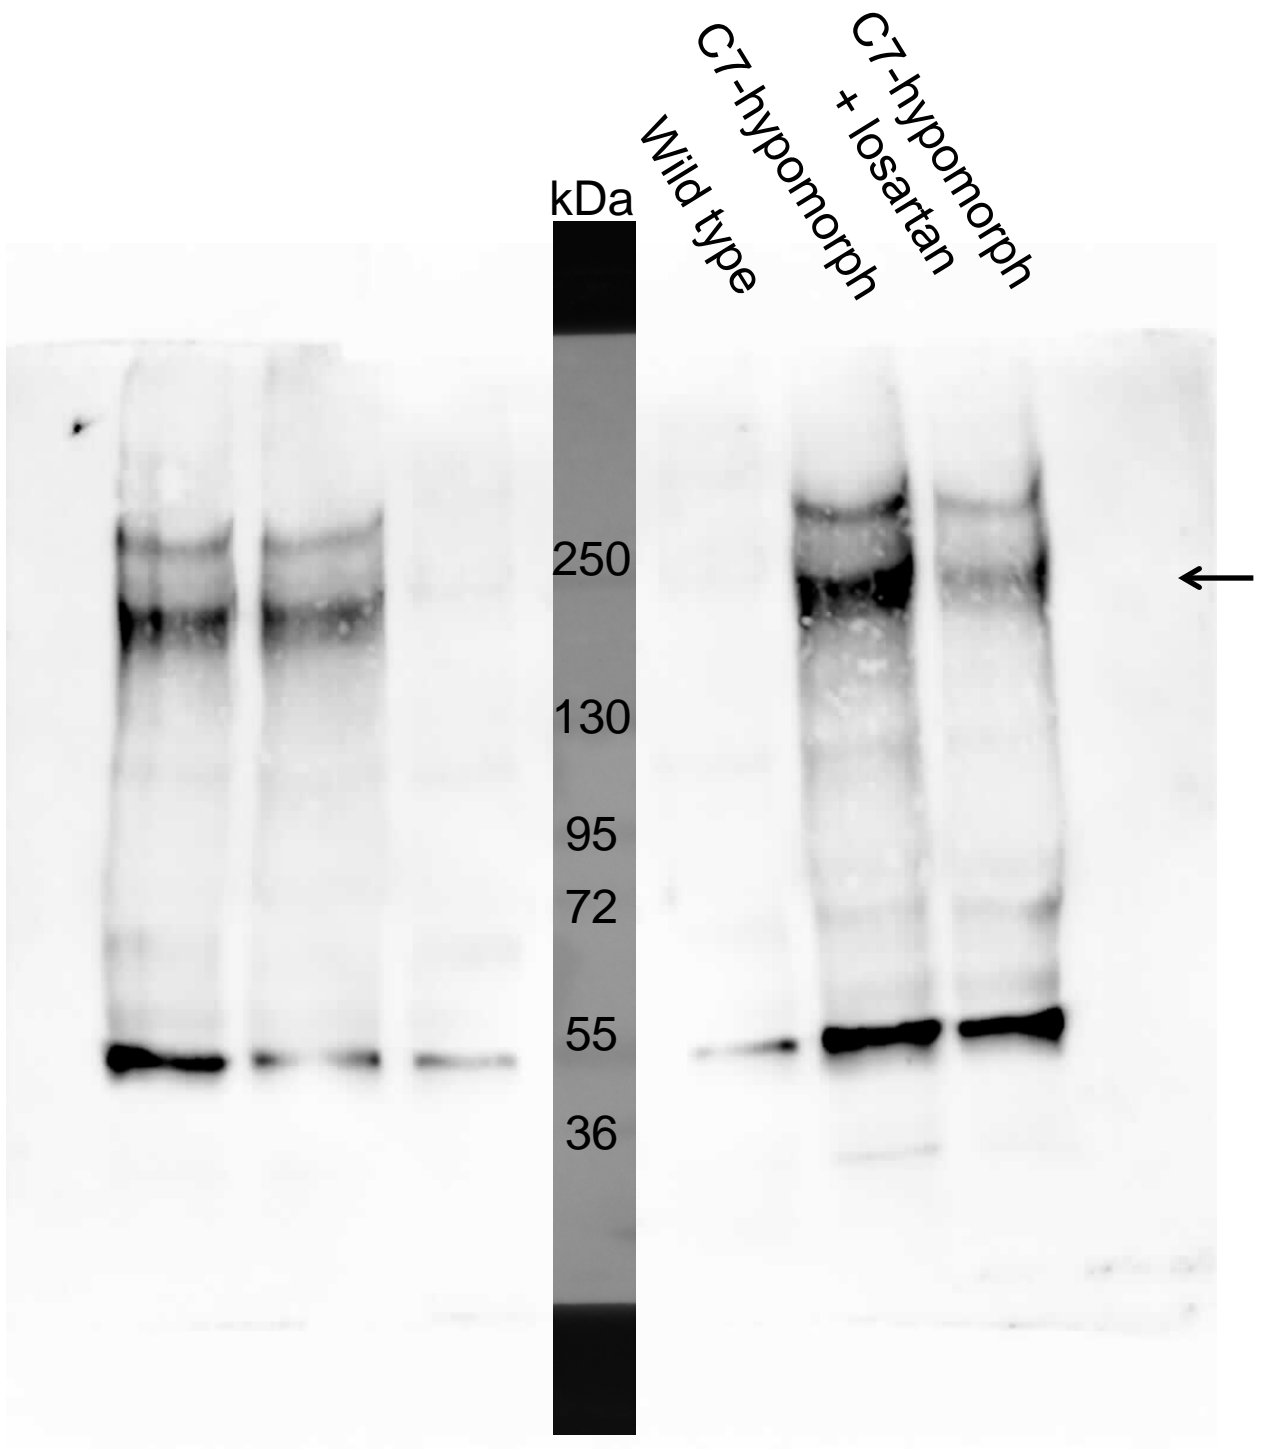

**Figure 5A.** Tenascin-C

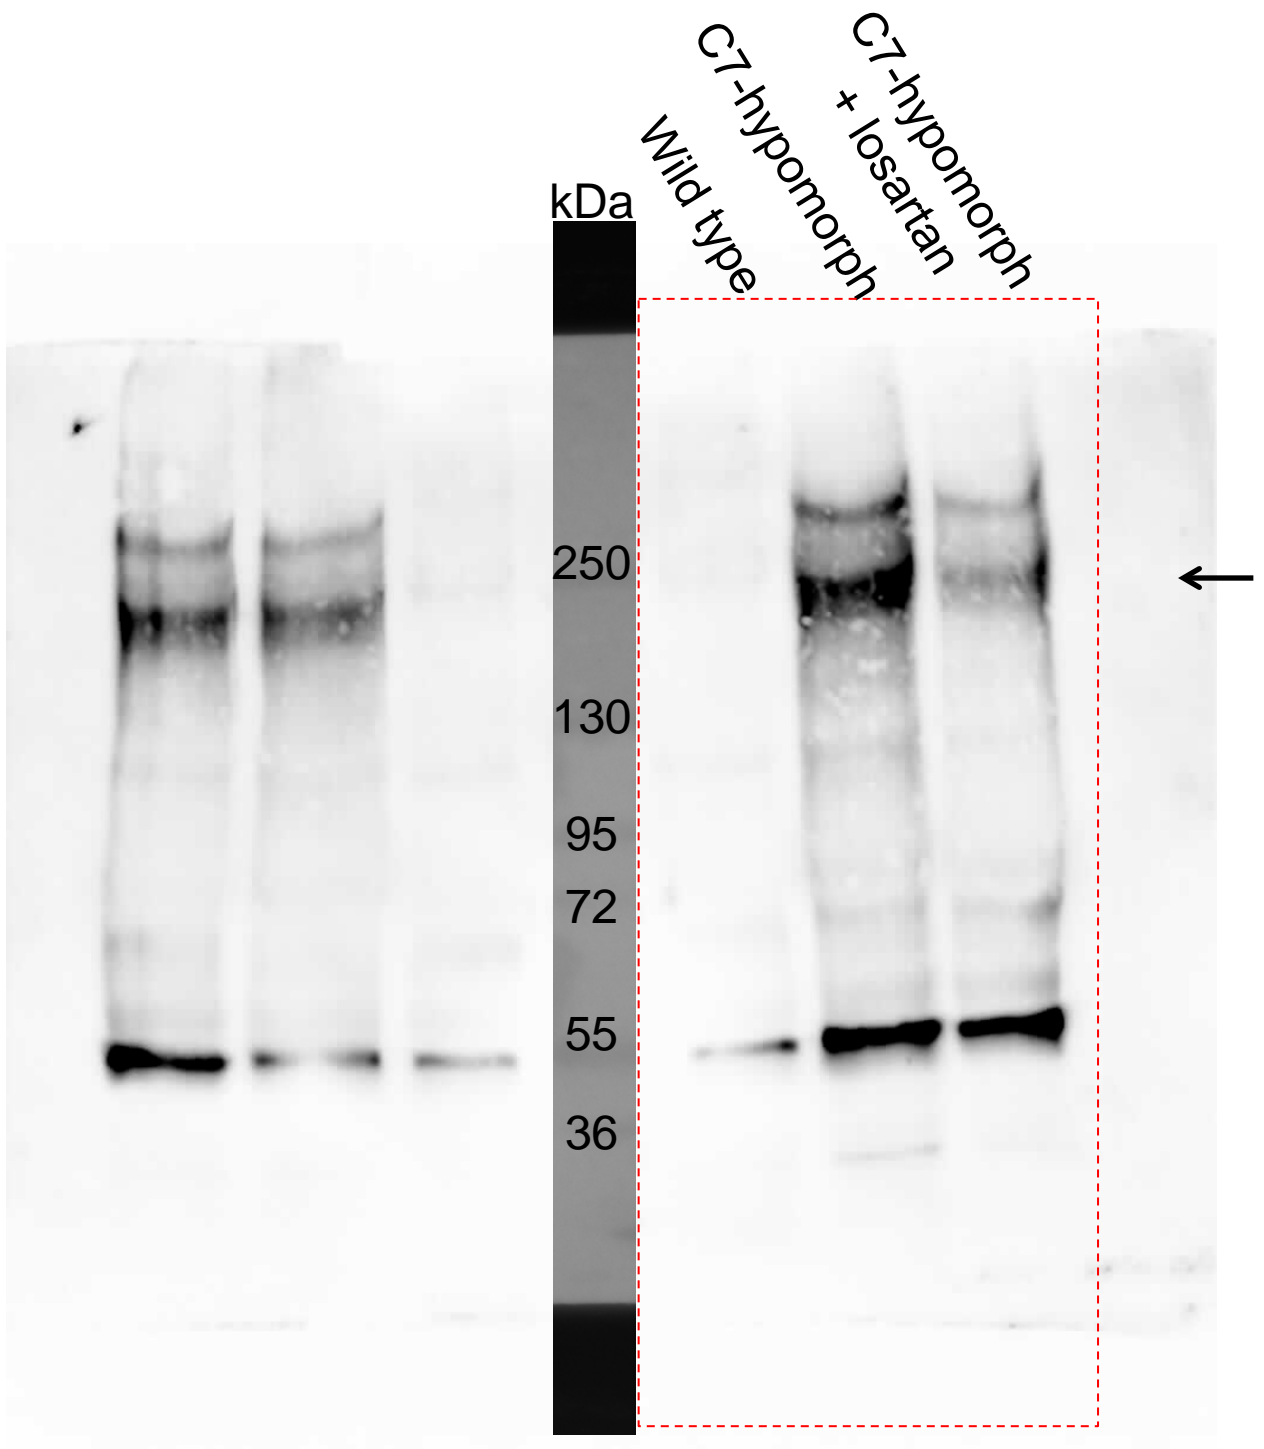

**Figure 5A.** Tenascin-C

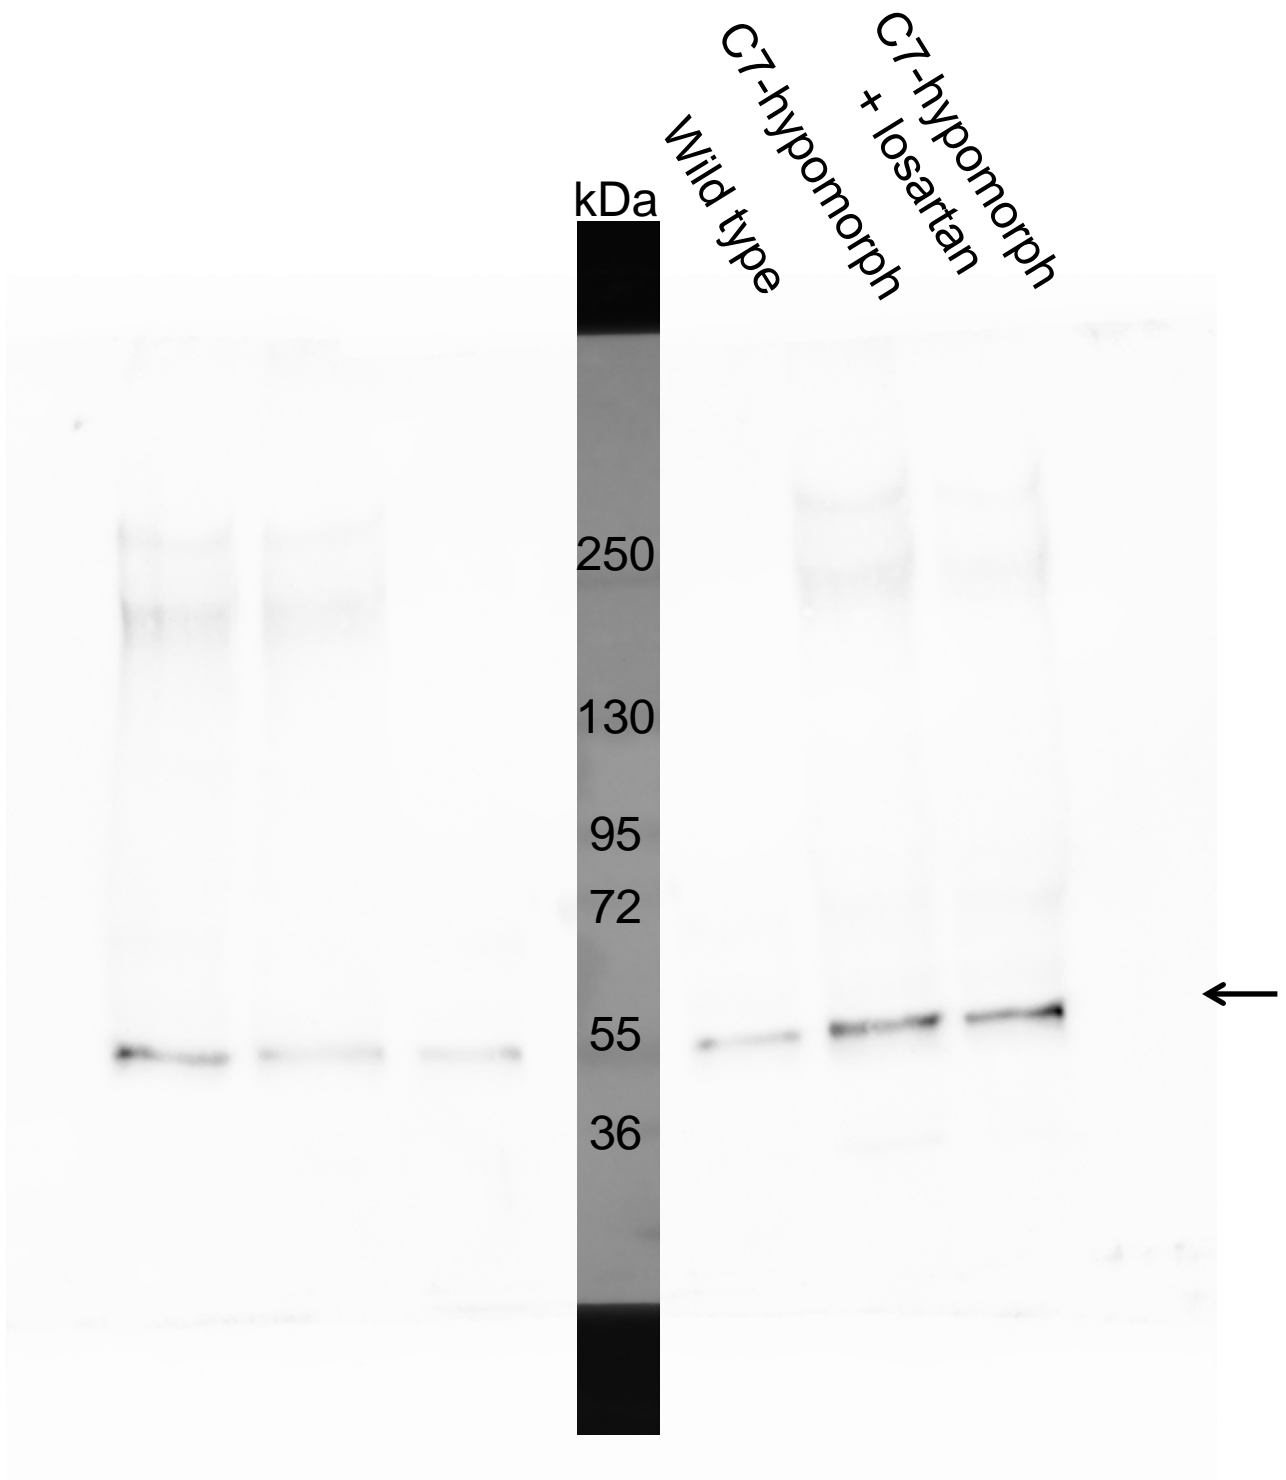

**Figure 5A.**  $\beta$ -tubulin

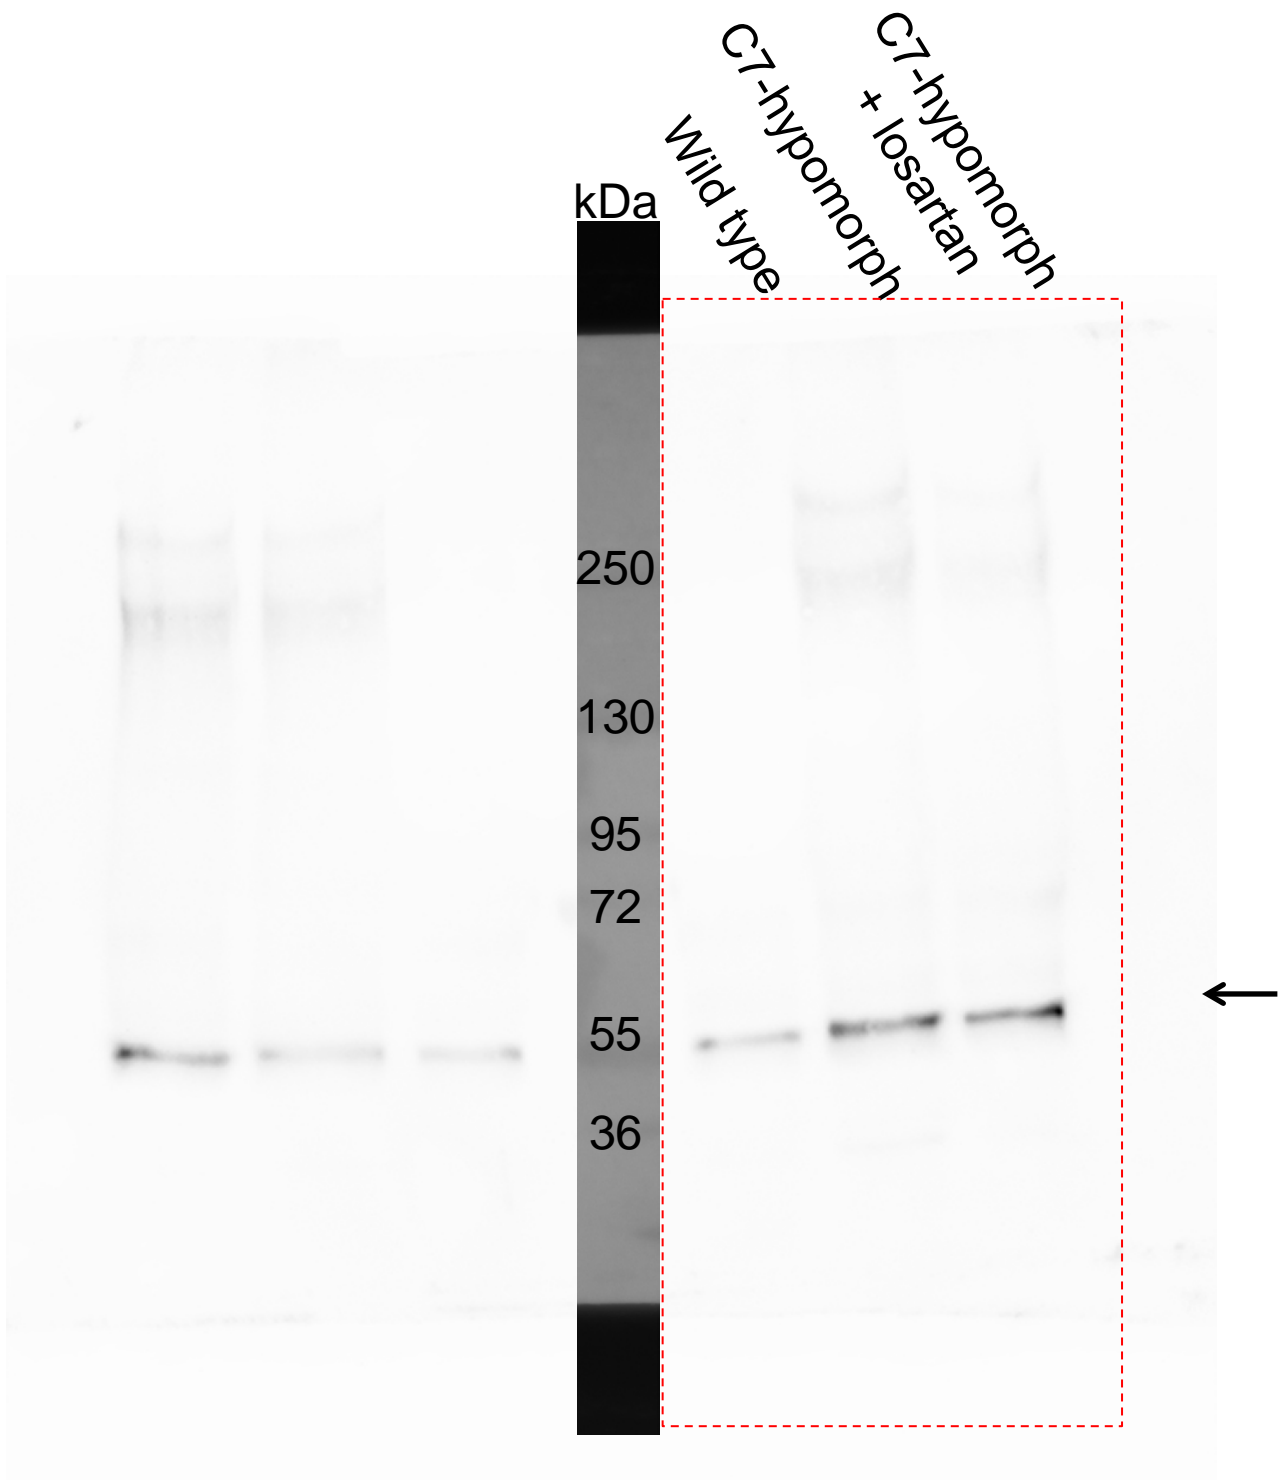

**Figure 5A.**  $\beta$ -tubulin
