# Supplementary material for: Losartan ameliorates dystrophic epidermolysis bullosa and uncovers new disease mechanisms
Source: PubMed Central journal article supplement (PMC4568953; doi:10.15252/emmm.201505061), 2015-07-20
Supplement: emmm0007-1211-sd6.pdf [file emmm0007-1211-sd6.pdf]

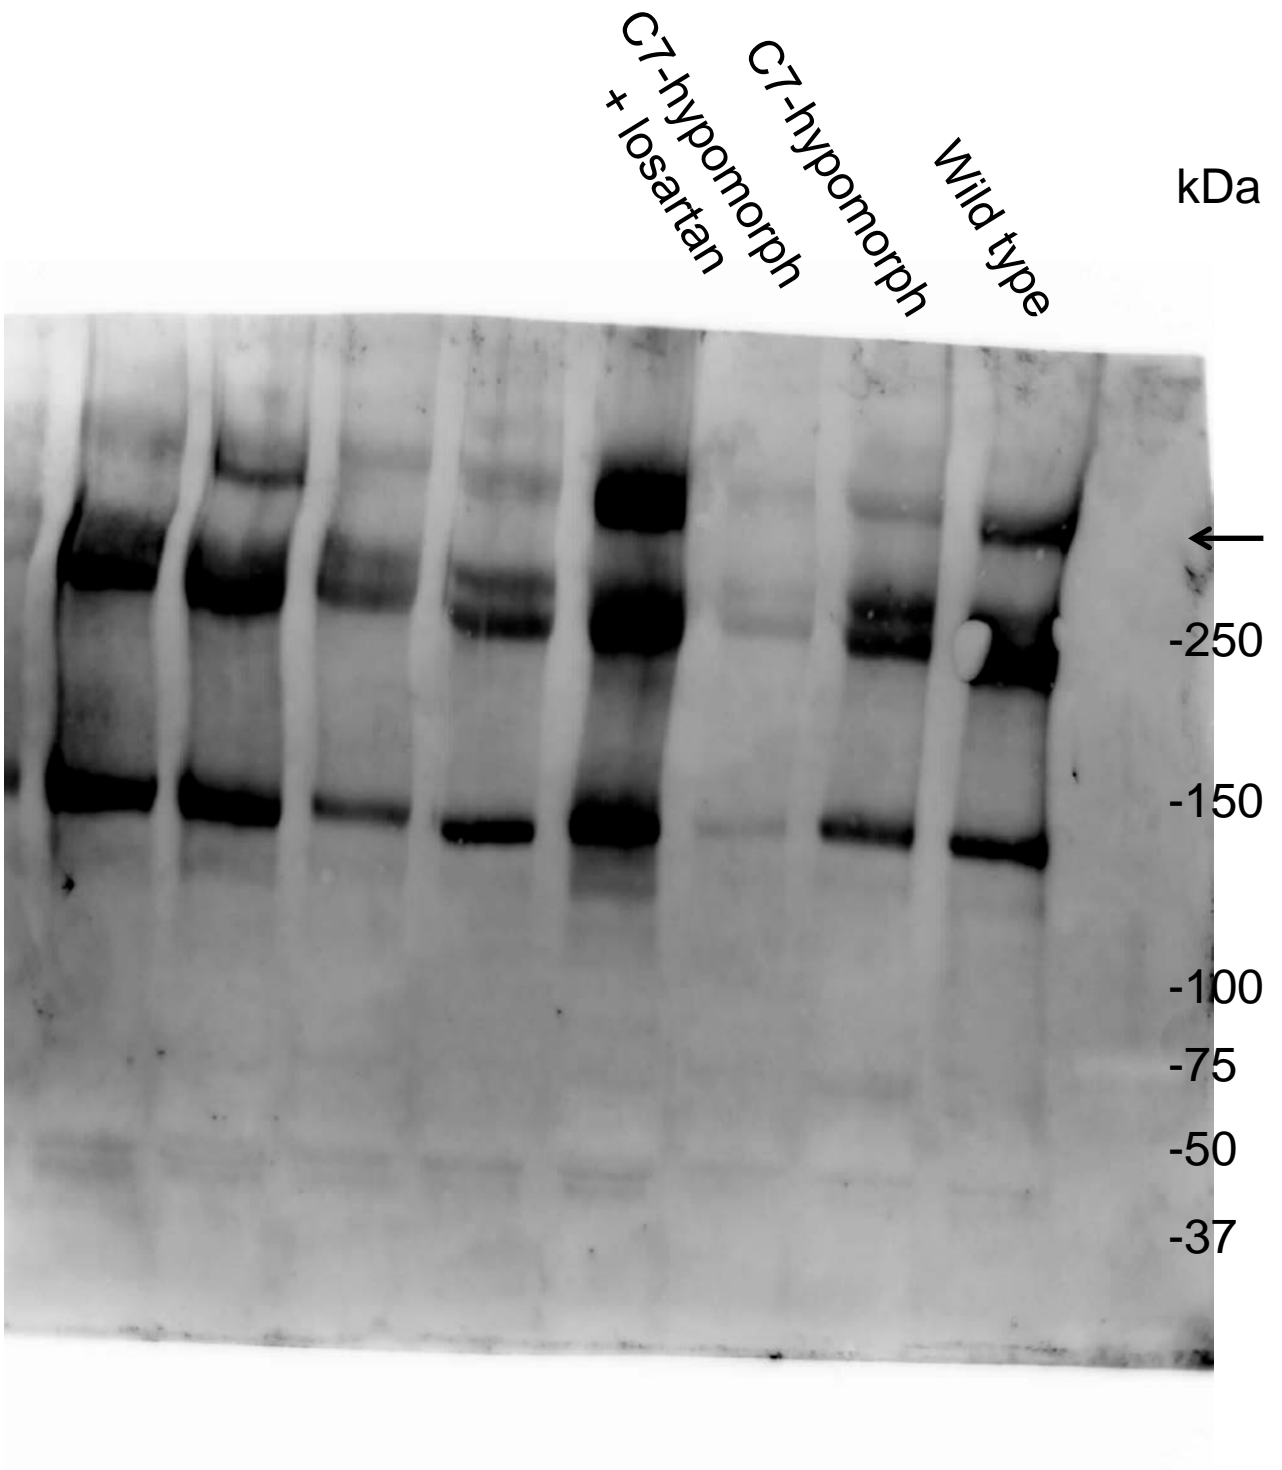

**Figure 6C. C7**

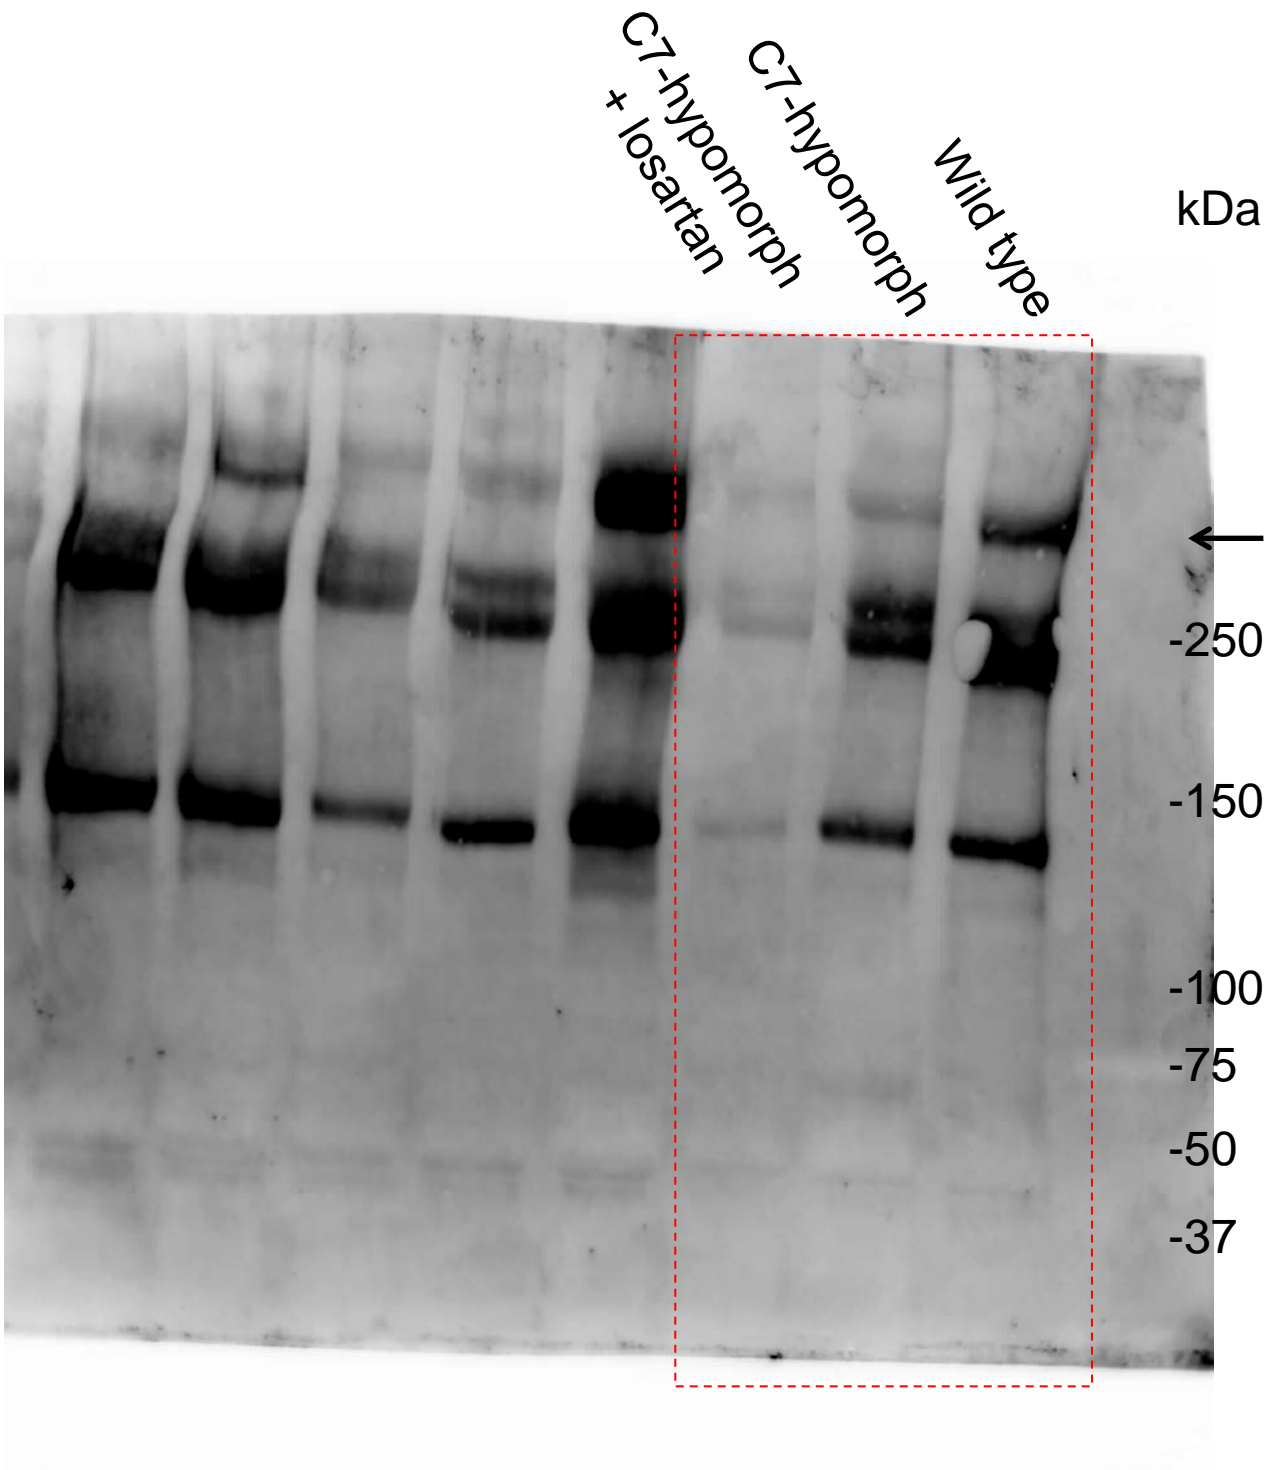

**Figure 6C. C7**

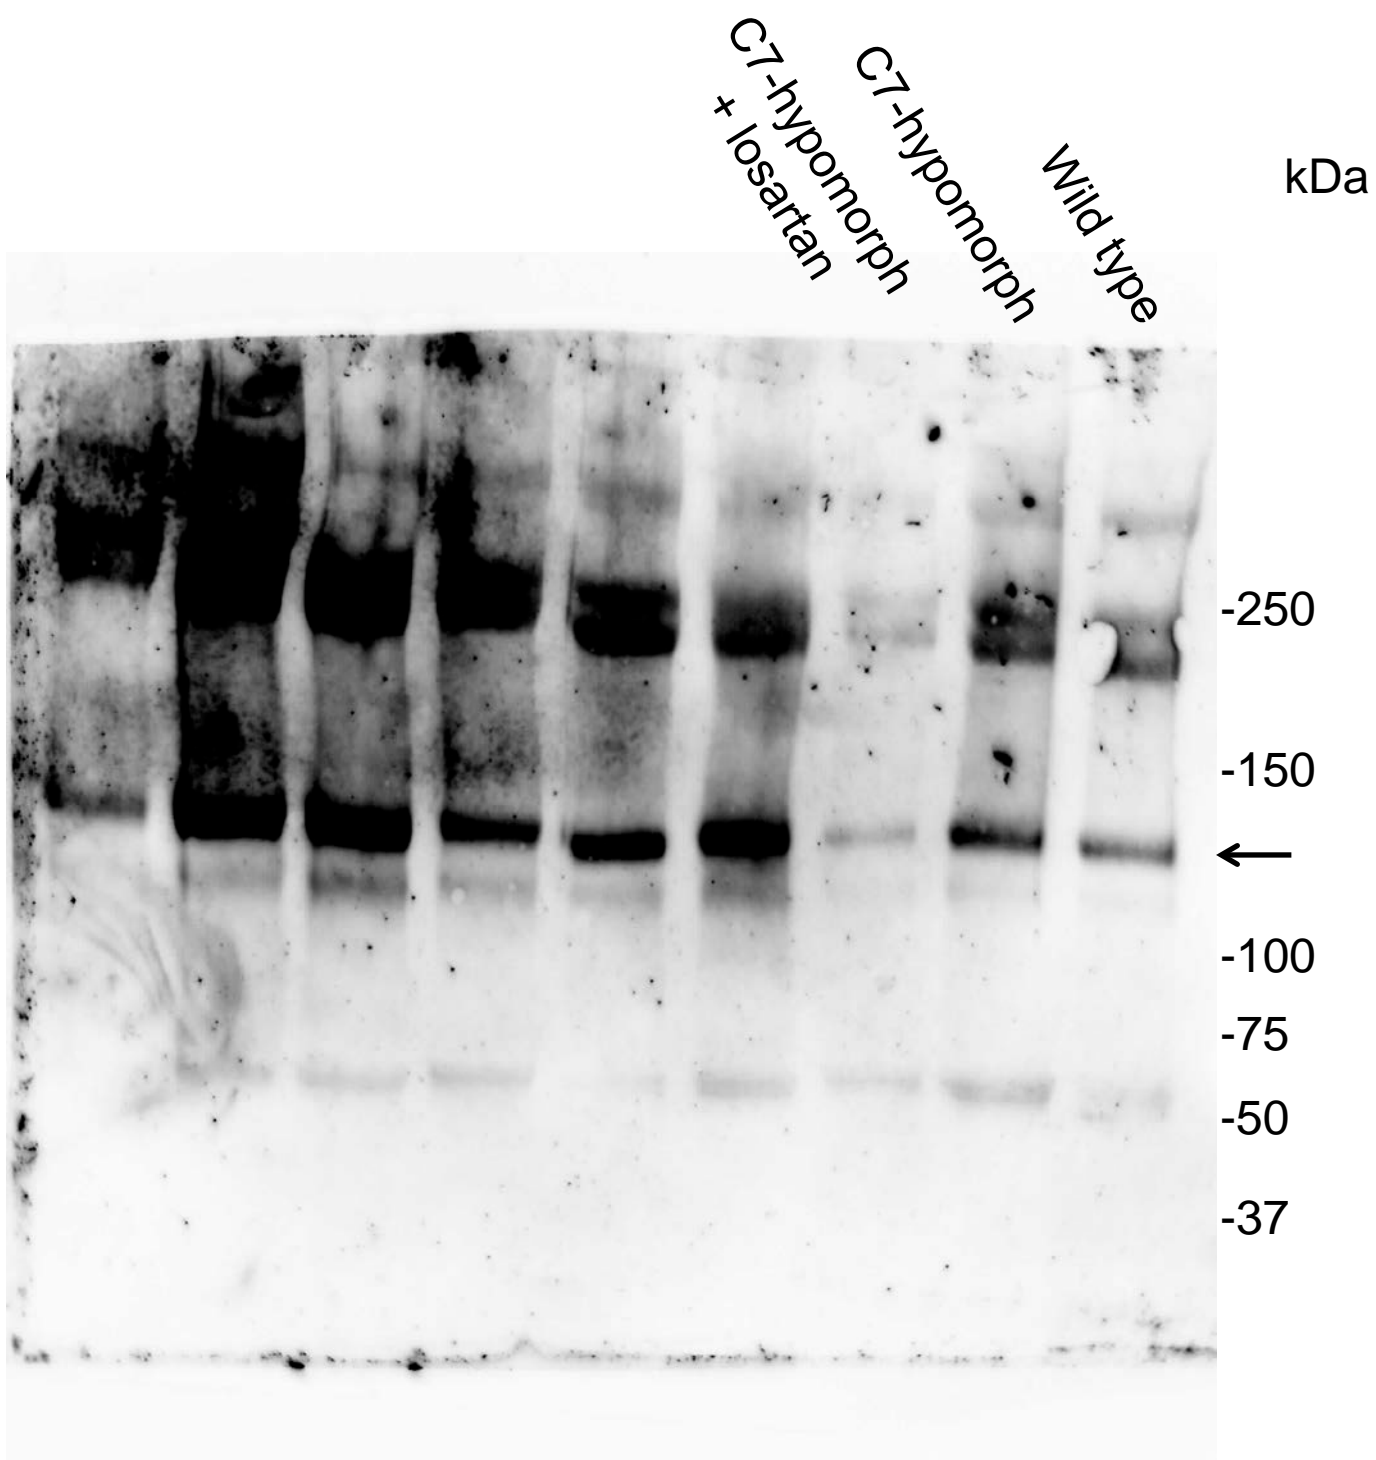

**Figure 6C.** Lrg1

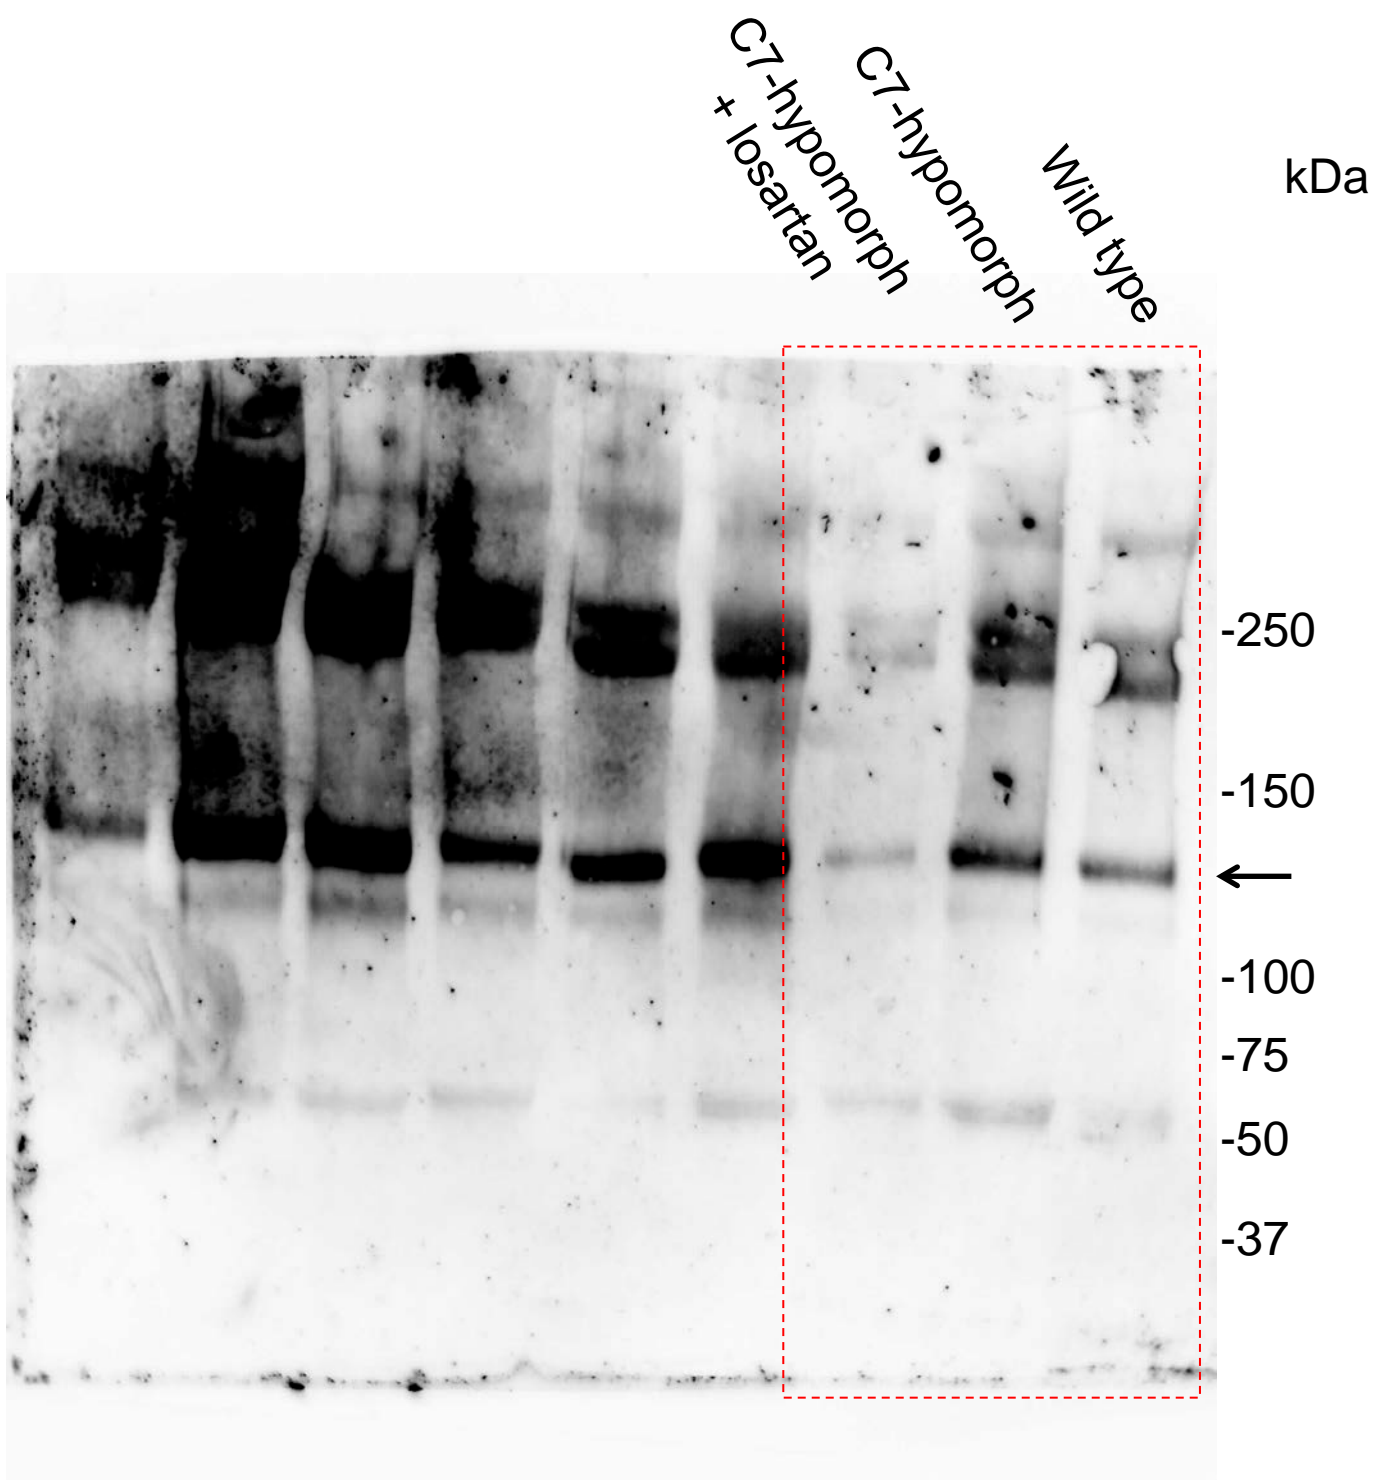

**Figure 6C.** Lrg1

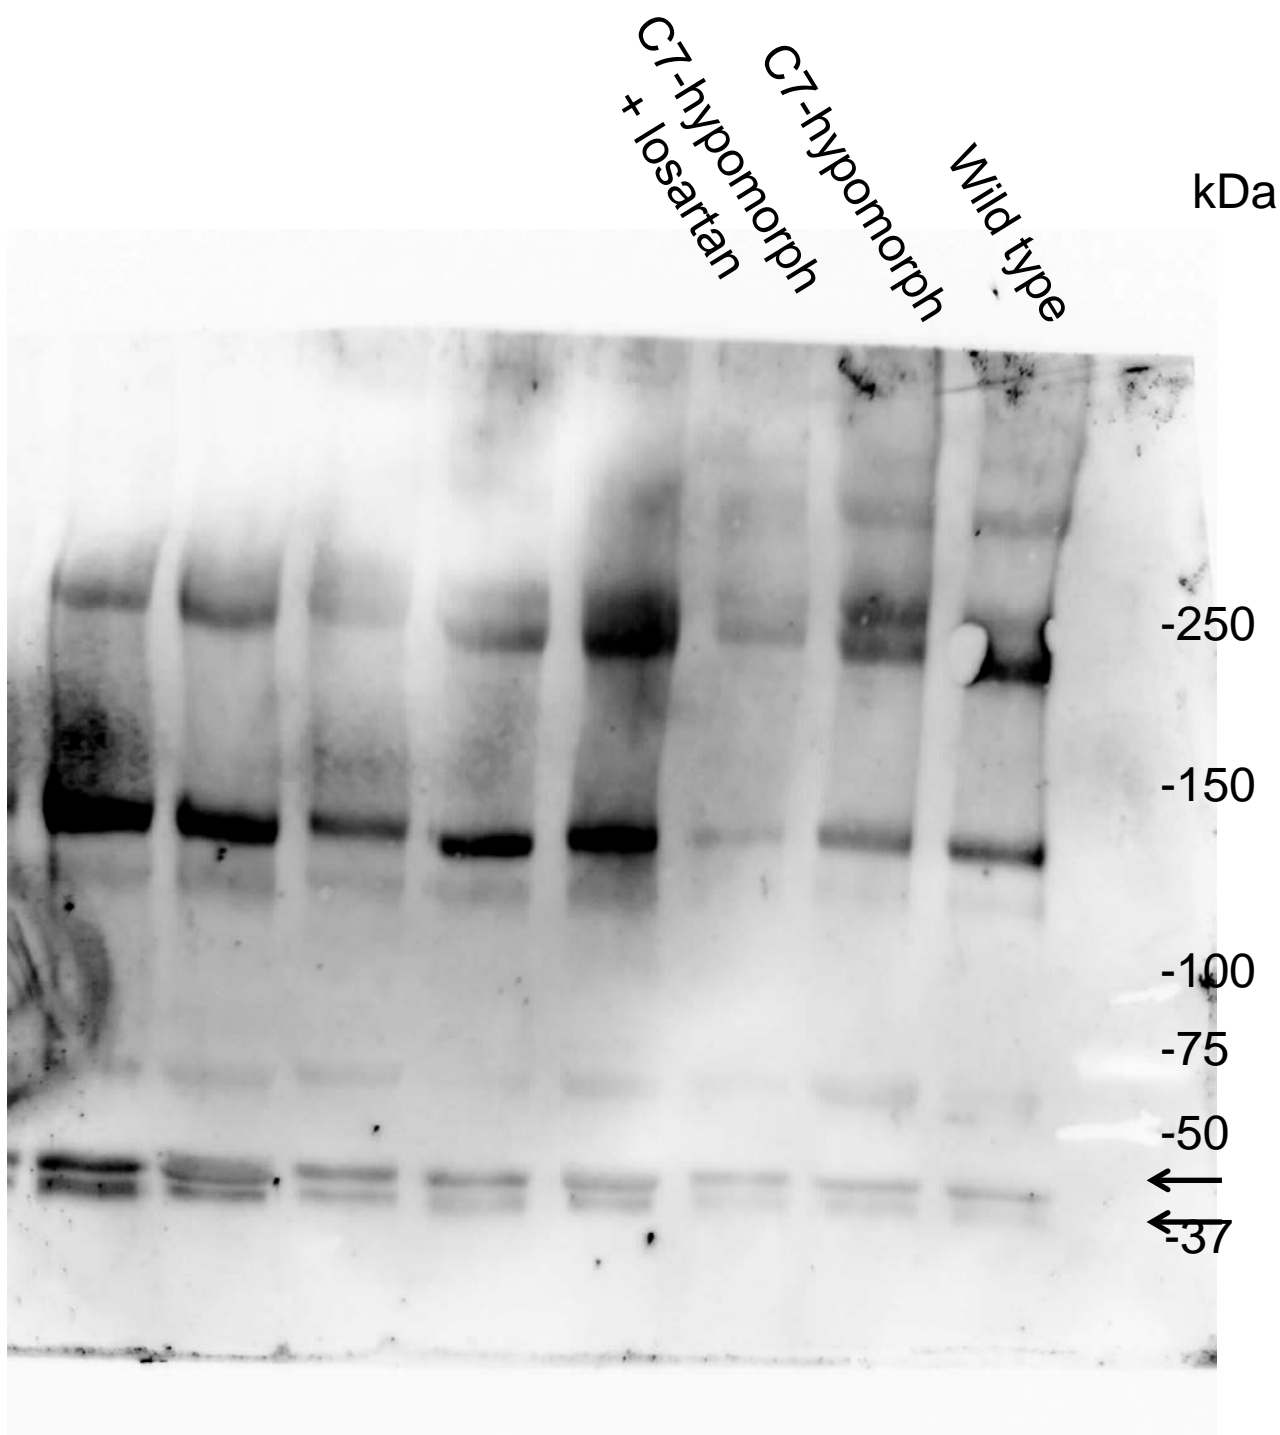

**Figure 6C.** Erk1/2

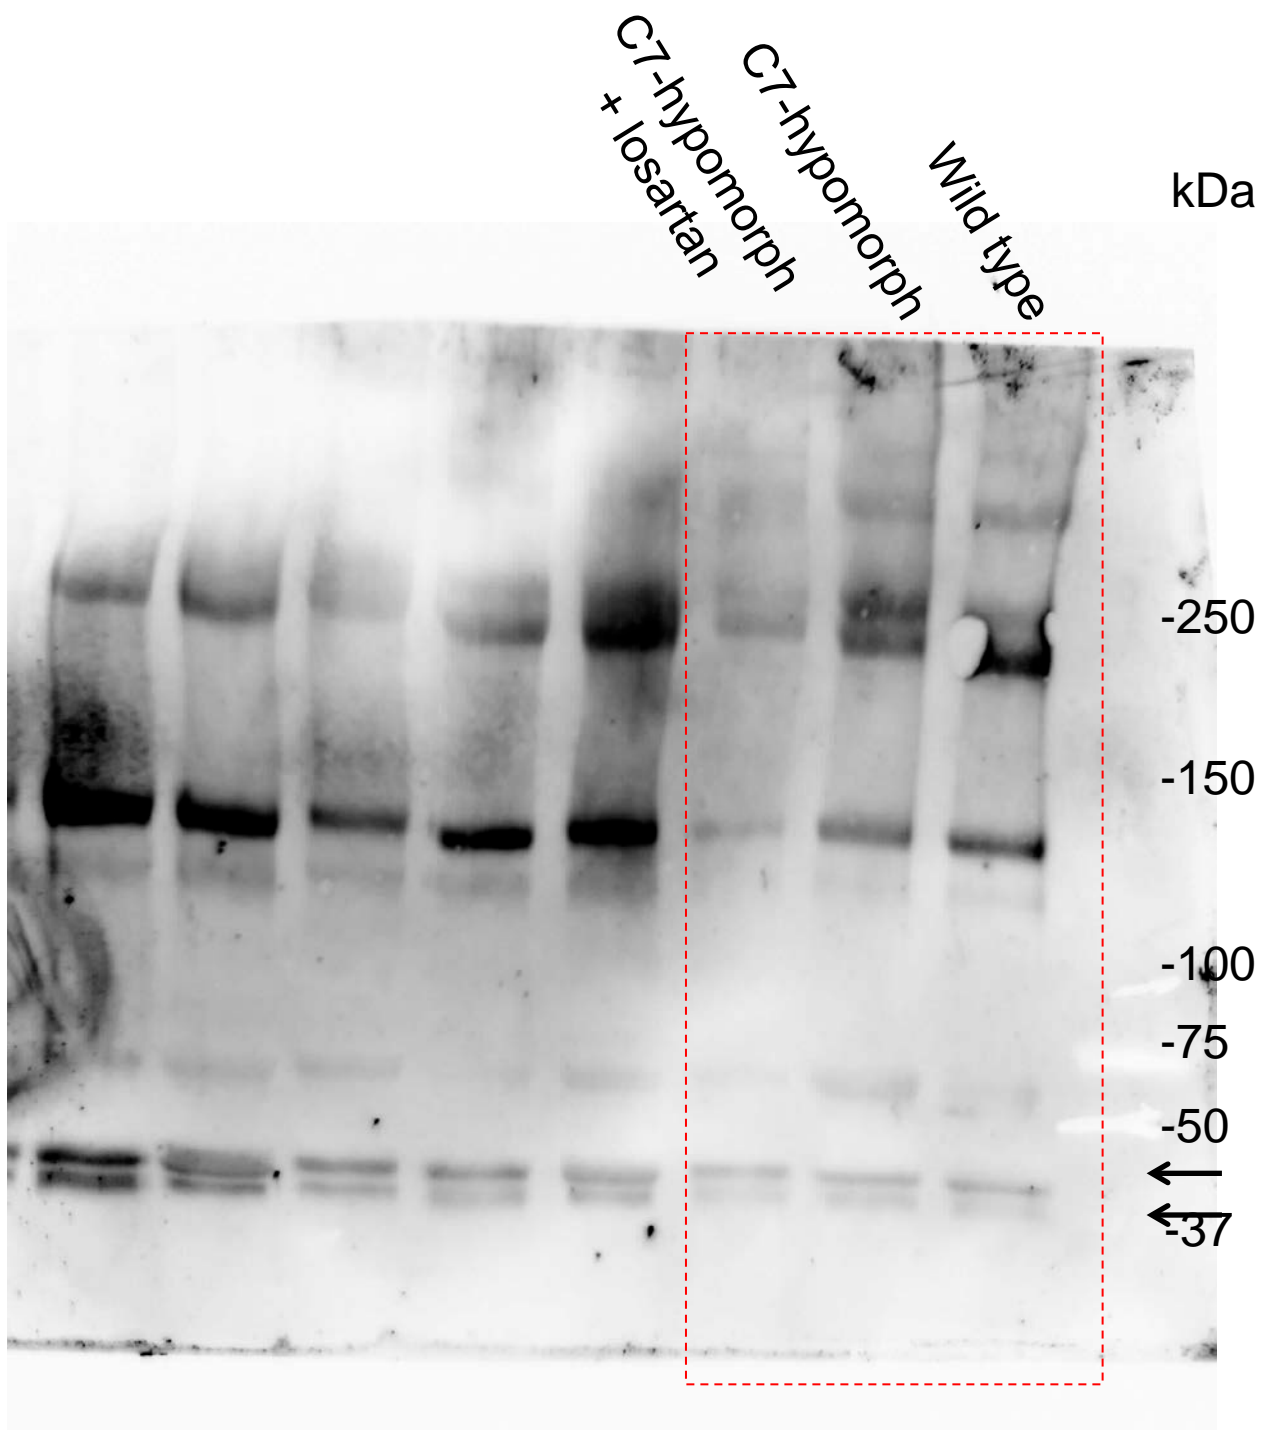

**Figure 6C.** Erk1/2

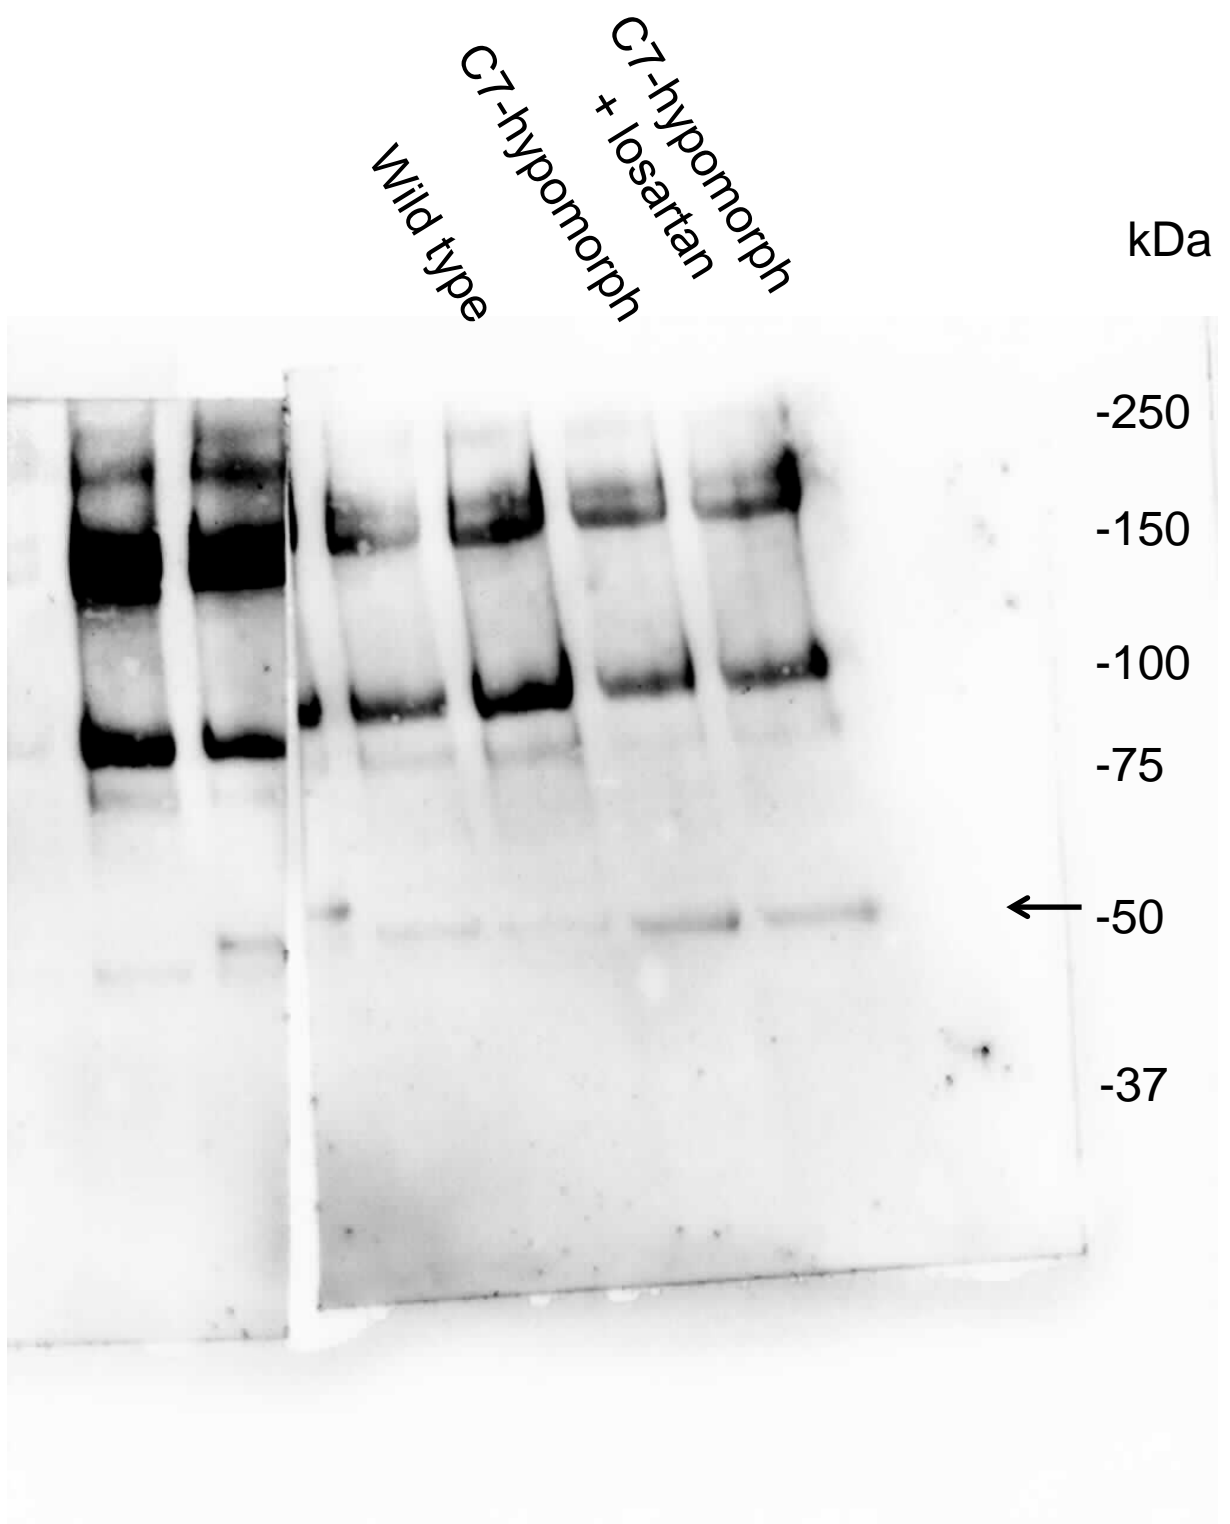

**Figure 6C.** Serpinf2

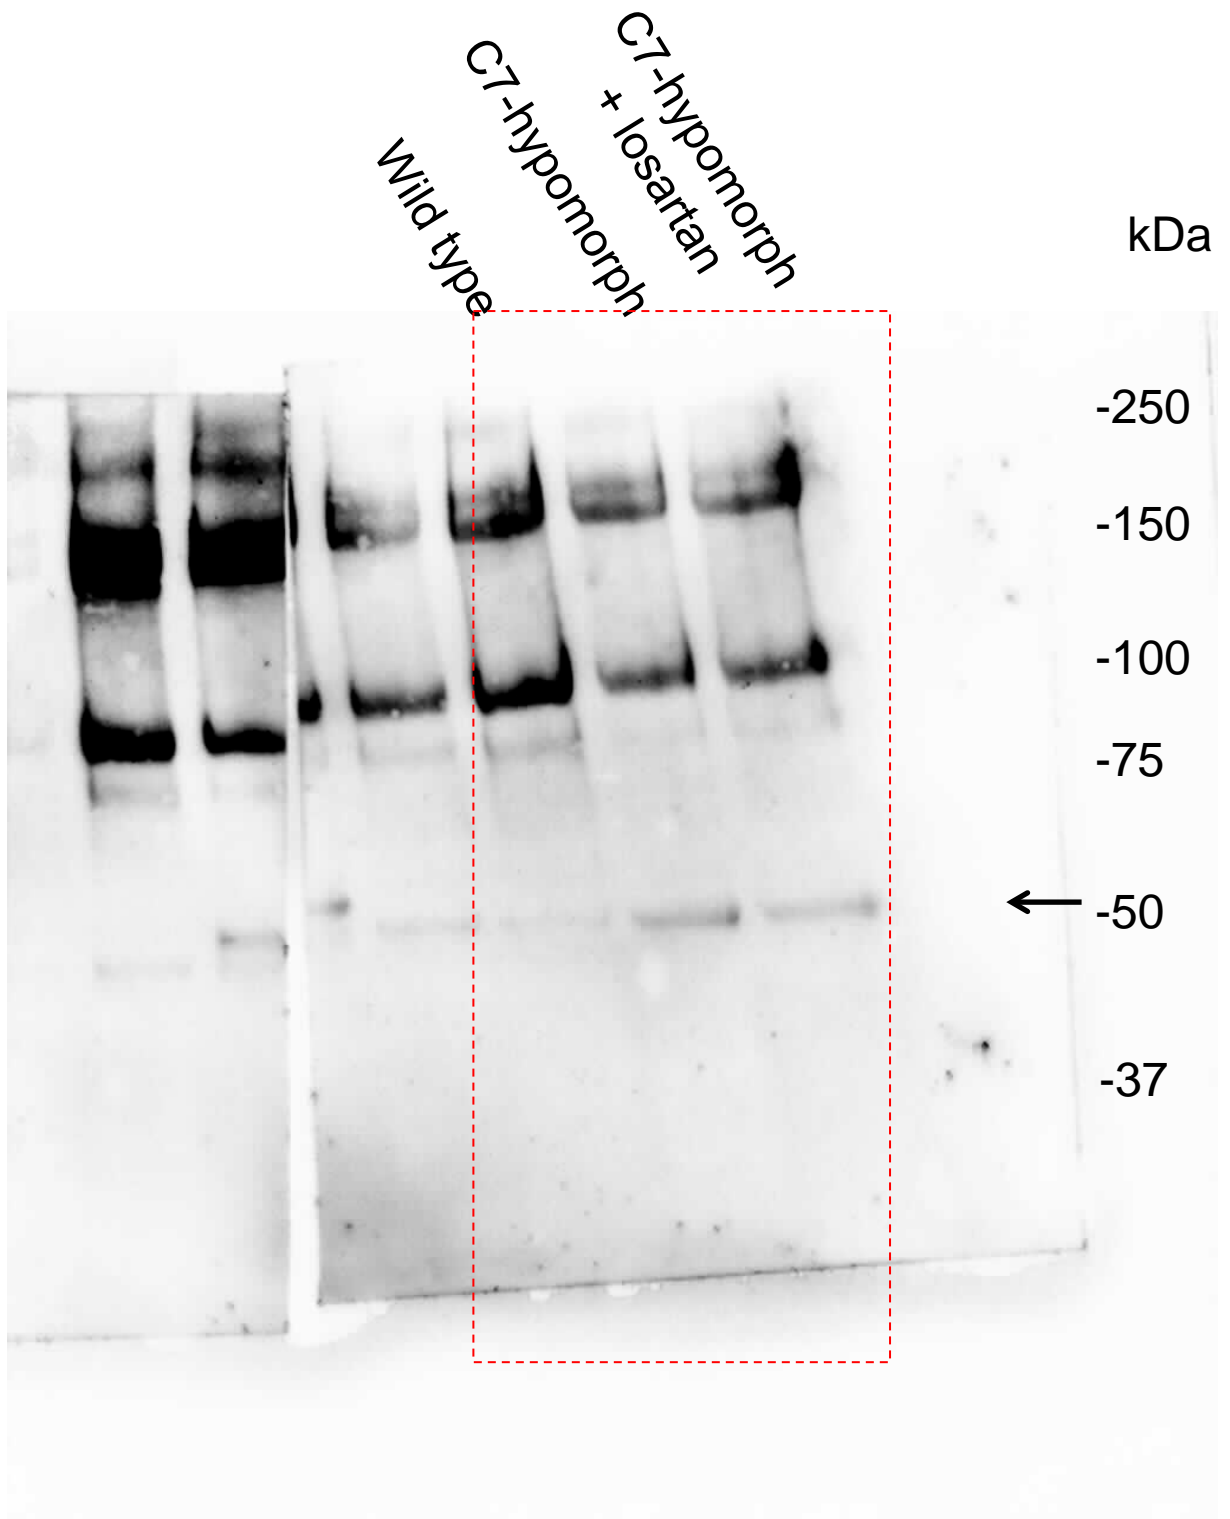

**Figure 6C.** Serpinf2



C7-hypomorph  
+ losartan

C7-hypomorph

Wild type

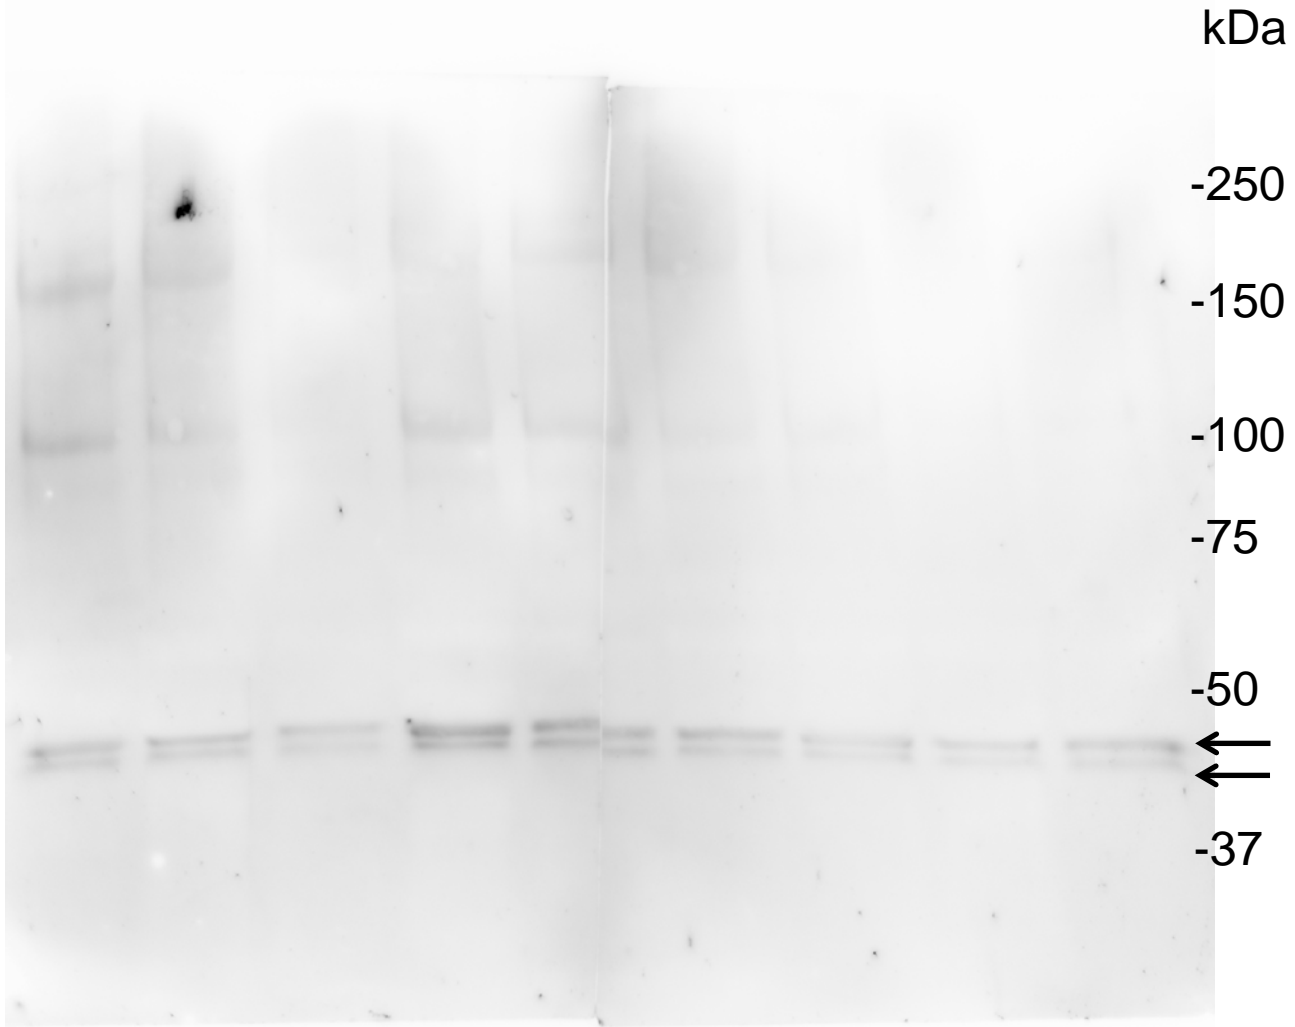

**Figure 6C.** Erk1/2

C7-hypomorph  
+ losartan

C7-hypomorph

Wild type

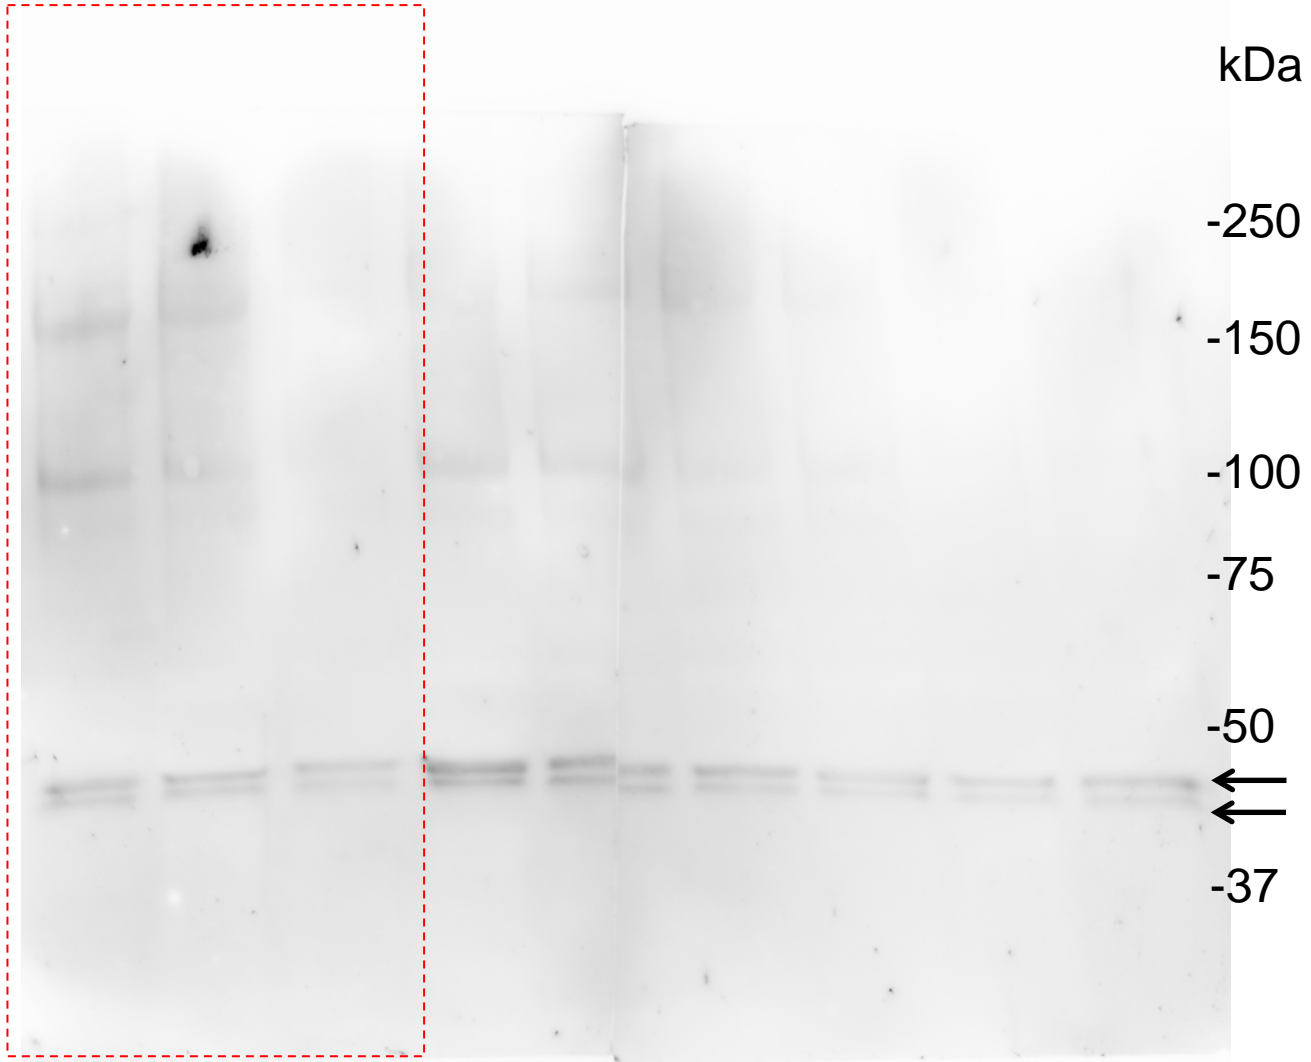

**Figure 6C.** Erk1/2

C7-hypomorph  
+ losartan

C7-hypomorph

Wild type

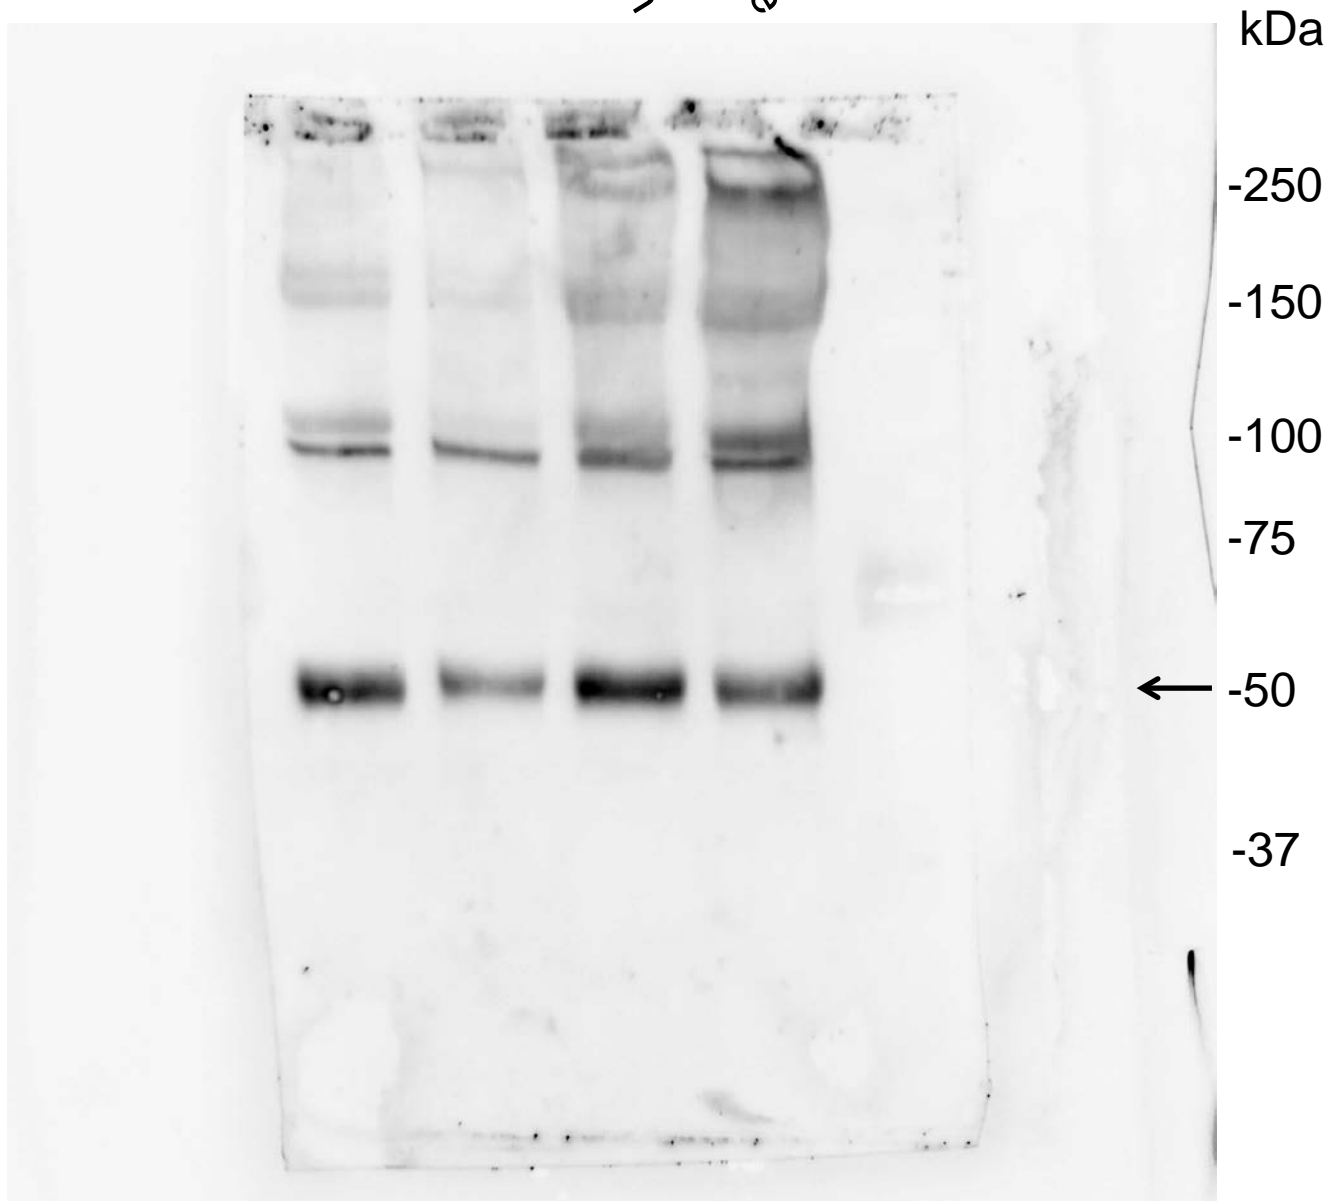

**Figure 6C.** Vitronectin

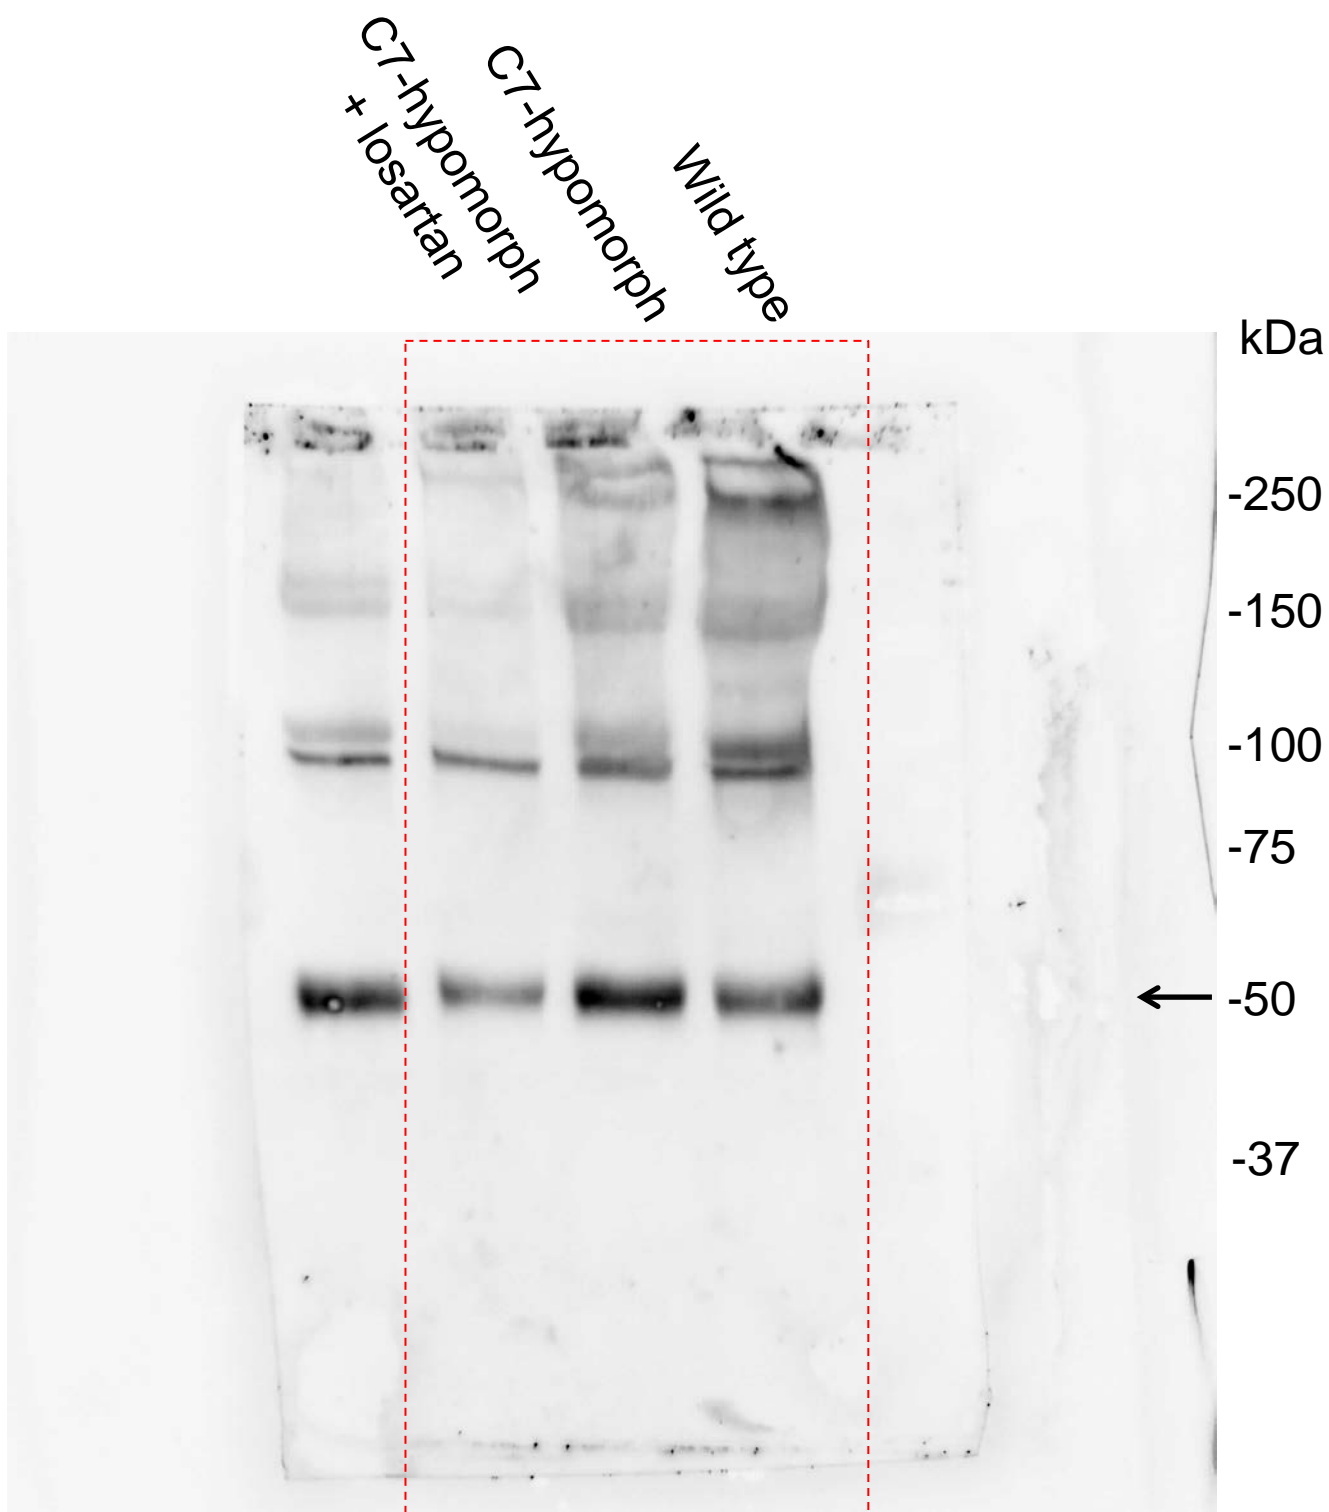

**Figure 6C.** Vitronectin

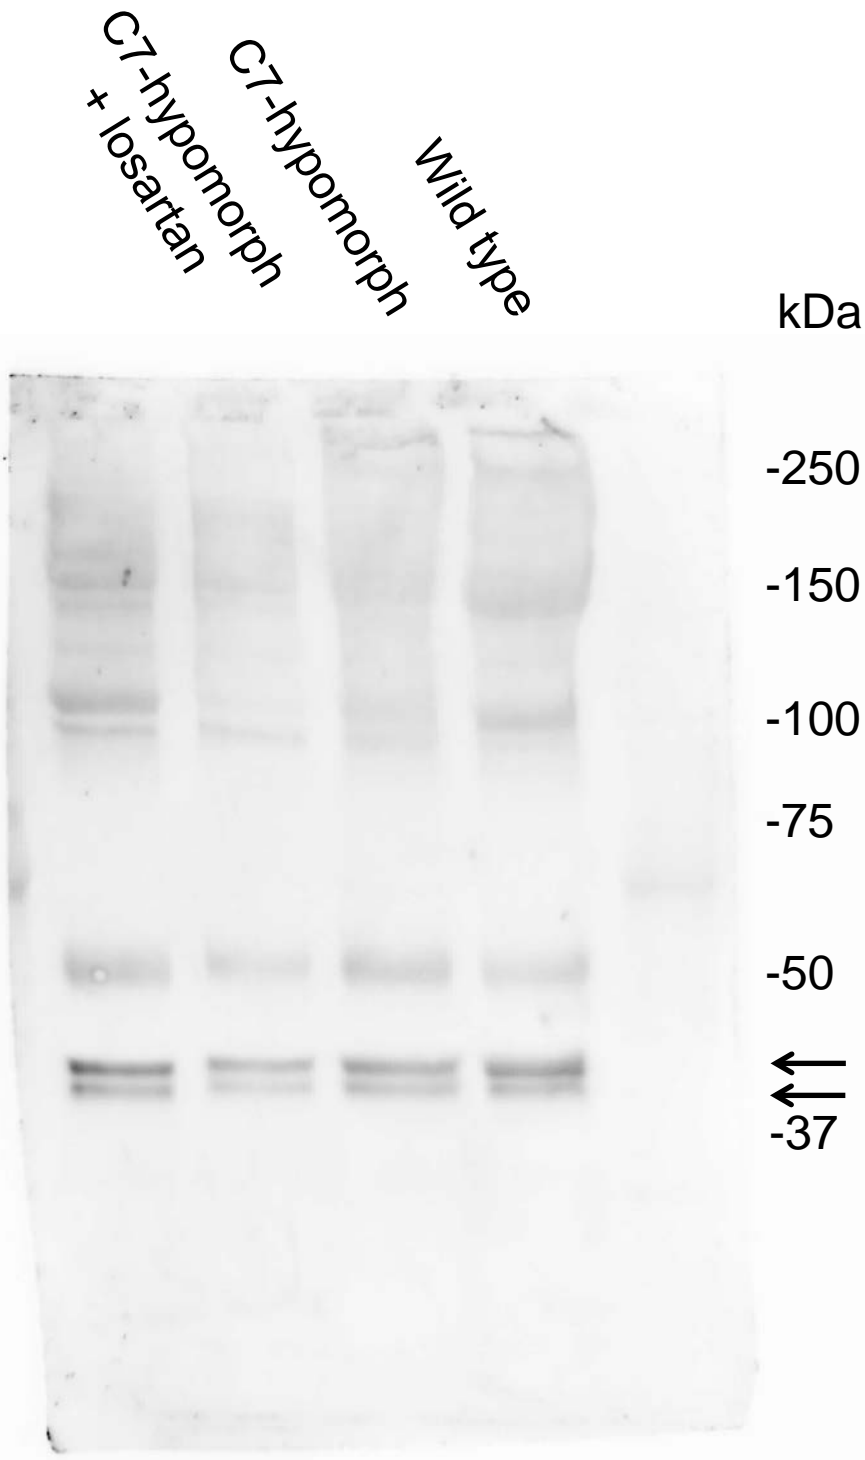

**Figure 6C.** Erk1/2

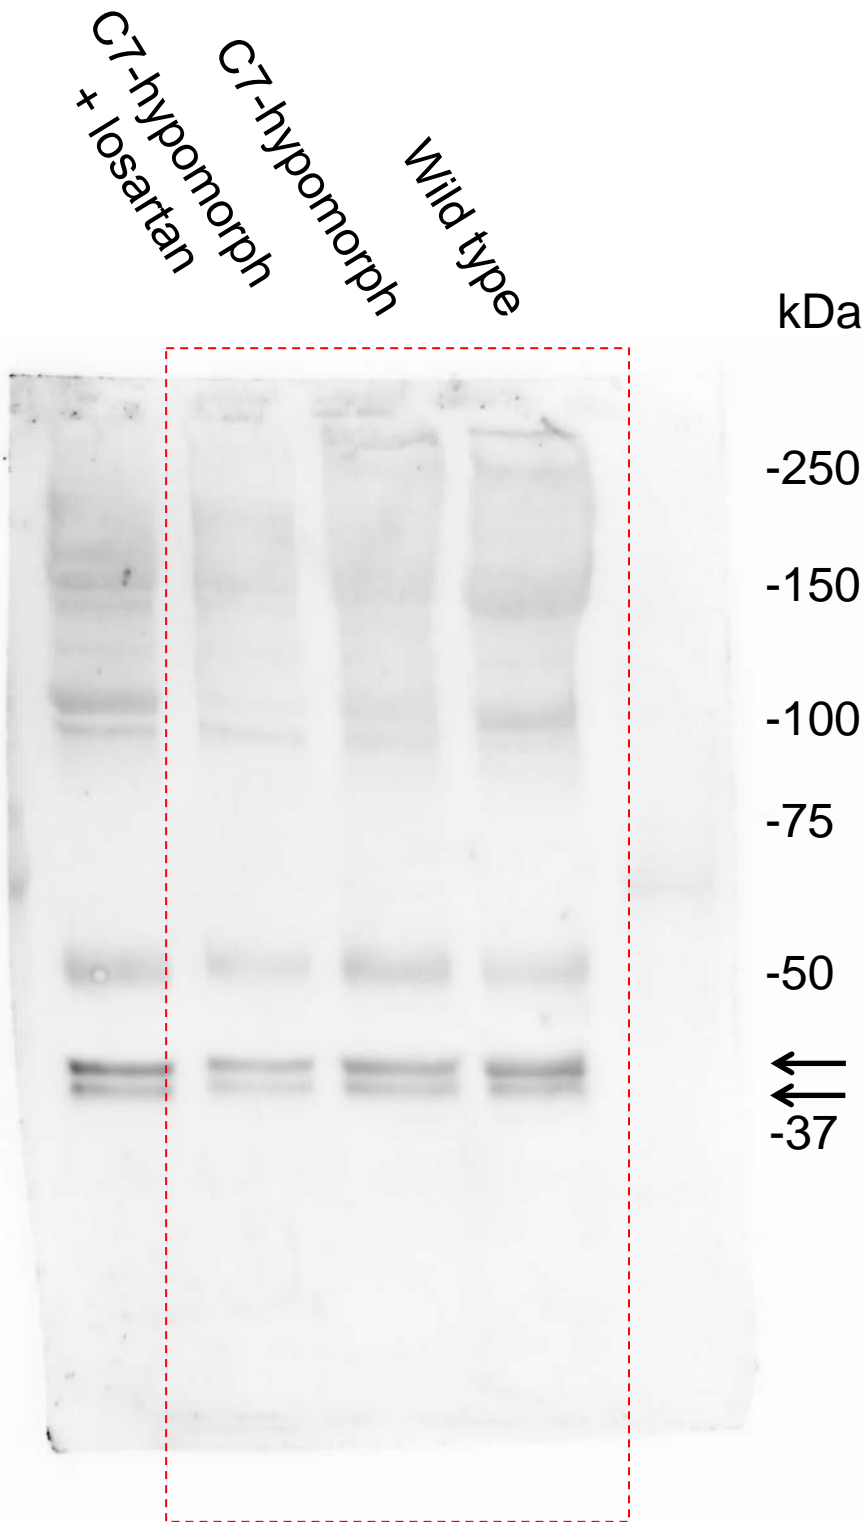

**Figure 6C.** Erk1/2
