# Supplementary material for: Losartan ameliorates dystrophic epidermolysis bullosa and uncovers new disease mechanisms
Source: PubMed Central journal article supplement (PMC4568953; doi:10.15252/emmm.201505061), 2015-07-20
Supplement: emmm0007-1211-sd7.pdf [file emmm0007-1211-sd7.pdf]

kDa

Severe  
Moderate  
Wild type

250-  
130-  
95-  
72-  
55-  
36-

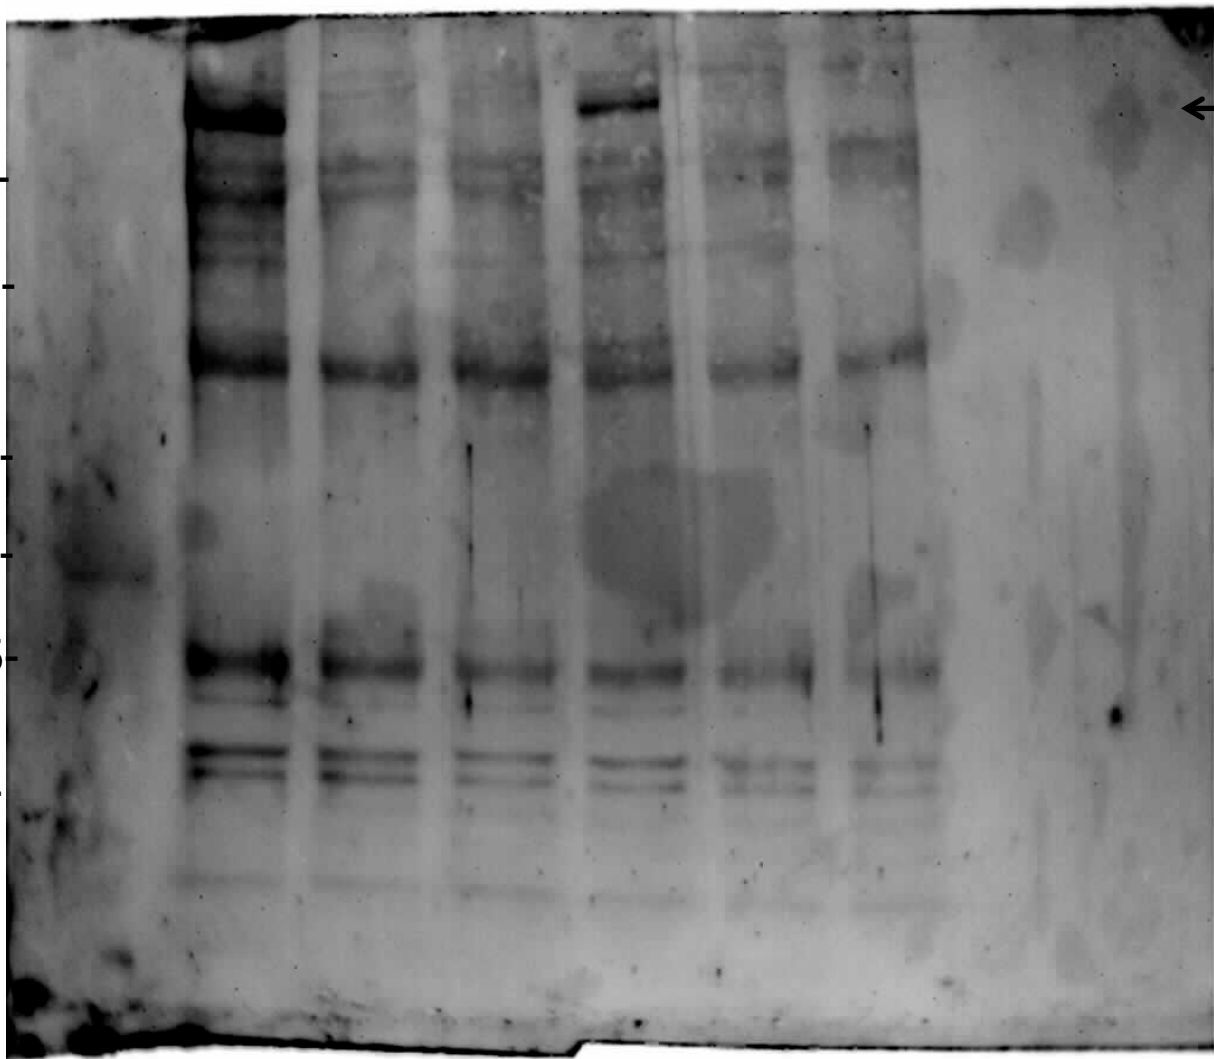

Figure 7E. C7

kDa

Severe  
Moderate  
Wild type

250-  
130-  
95-  
72-  
55-  
36-

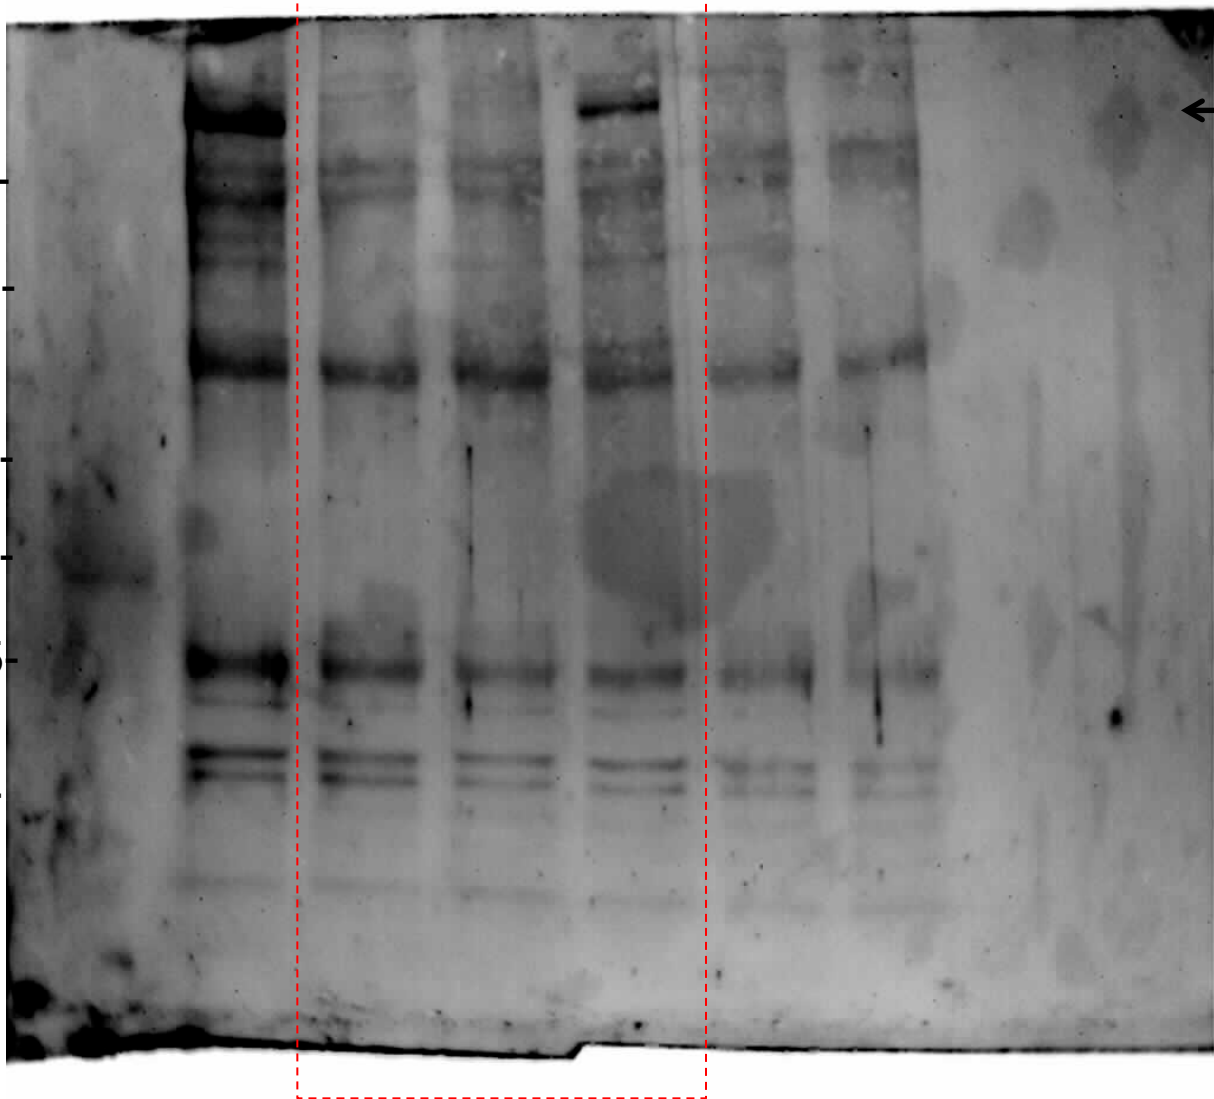

Figure 7E. C7

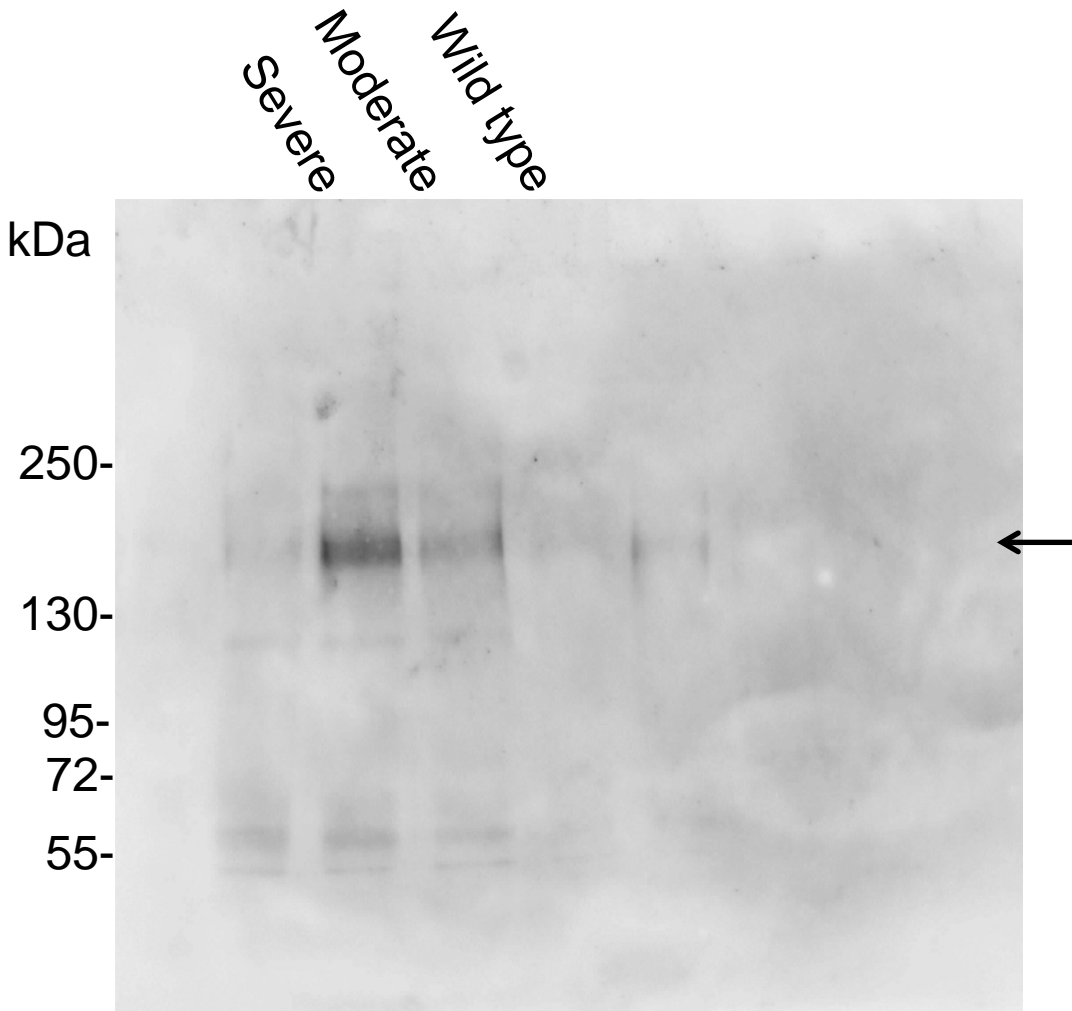

**Figure 7E.** Tenascin-C

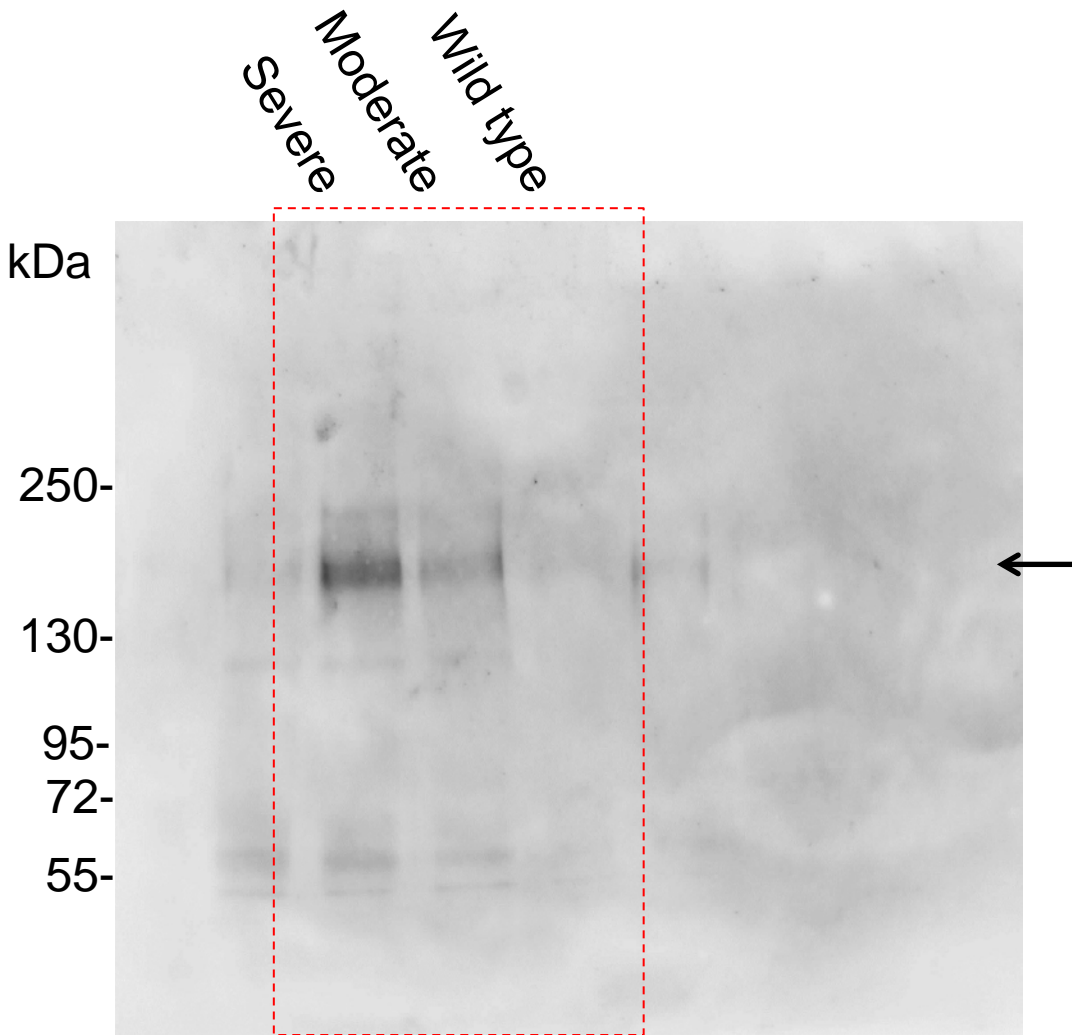

**Figure 7E.** Tenascin-C

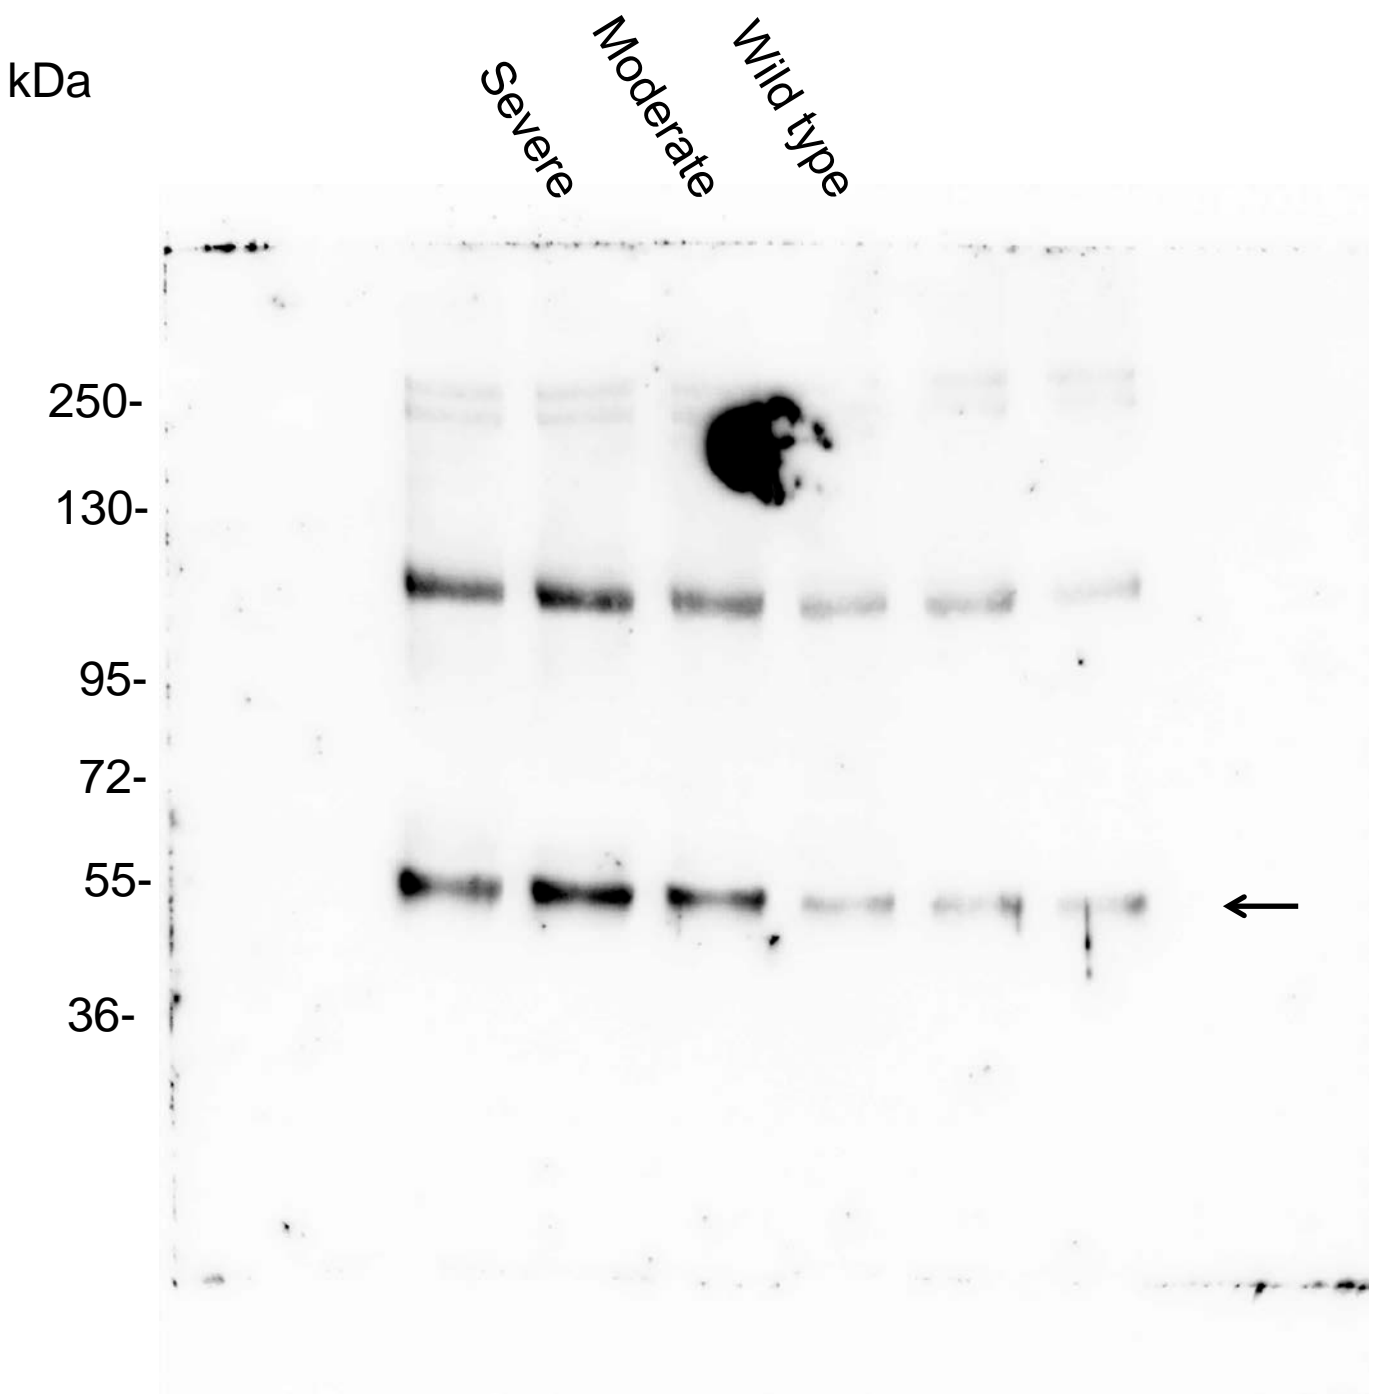

**Figure 7E.** C1q dimer

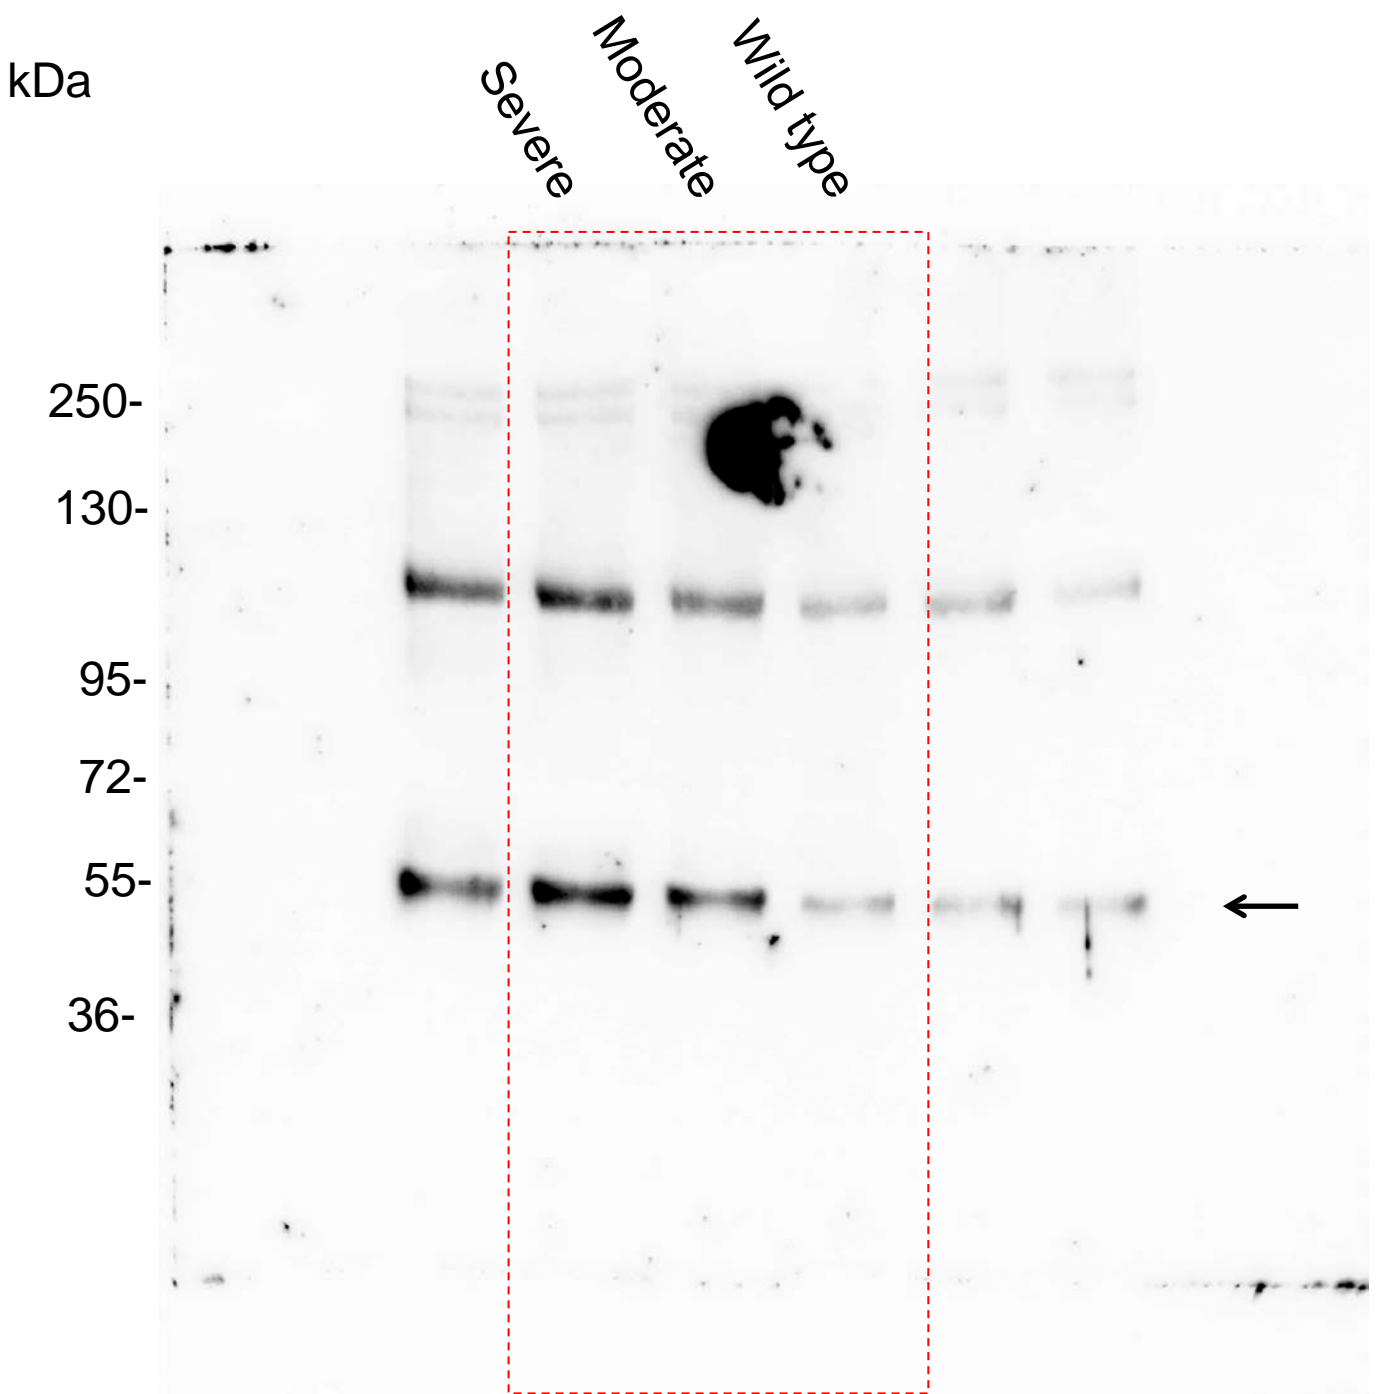

**Figure 7E.** C1q dimer

kDa

Severe  
Moderate  
Wild type

250-  
130-  
95-  
72-  
55-  
36-

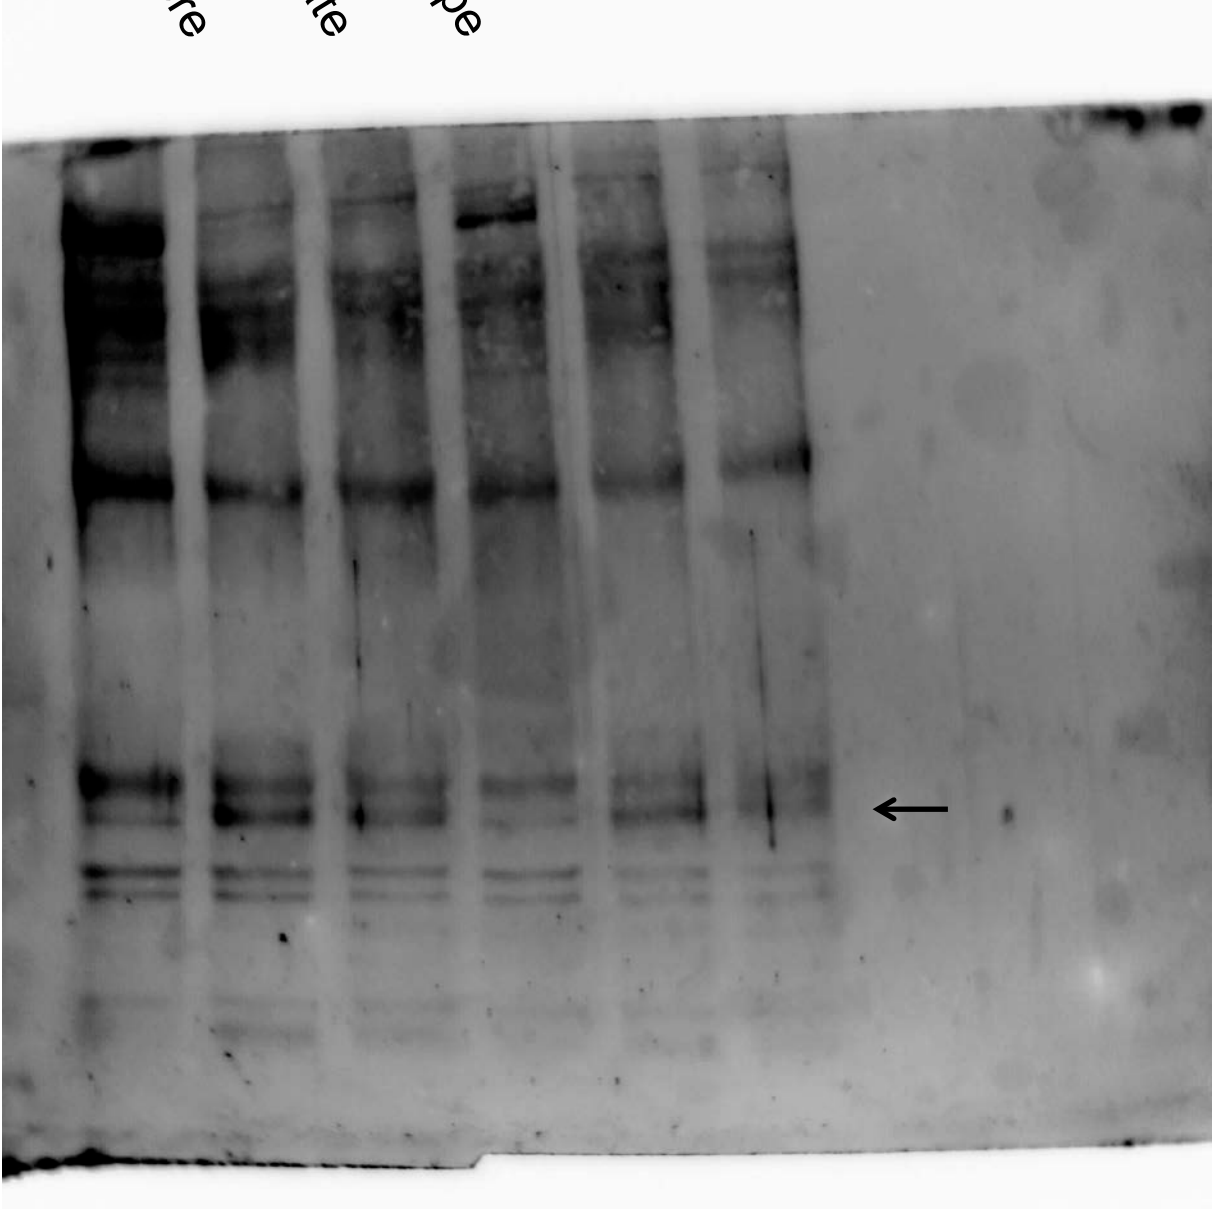

**Figure 7E. IgG**

kDa

Severe  
Moderate  
Wild type

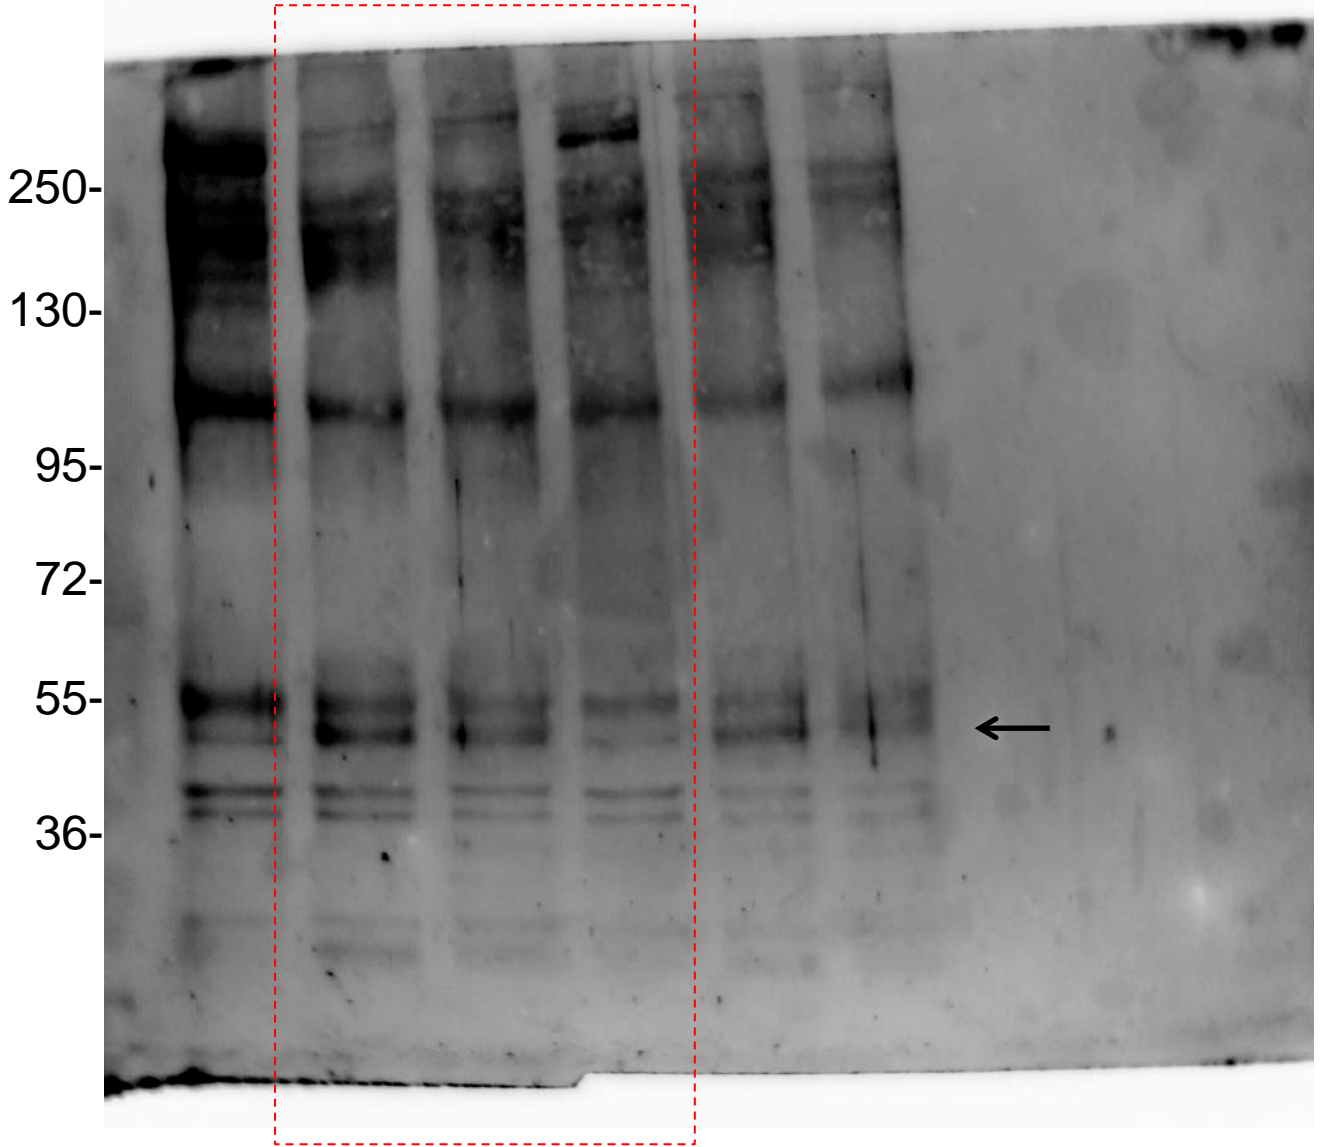

Figure 7E. IgG



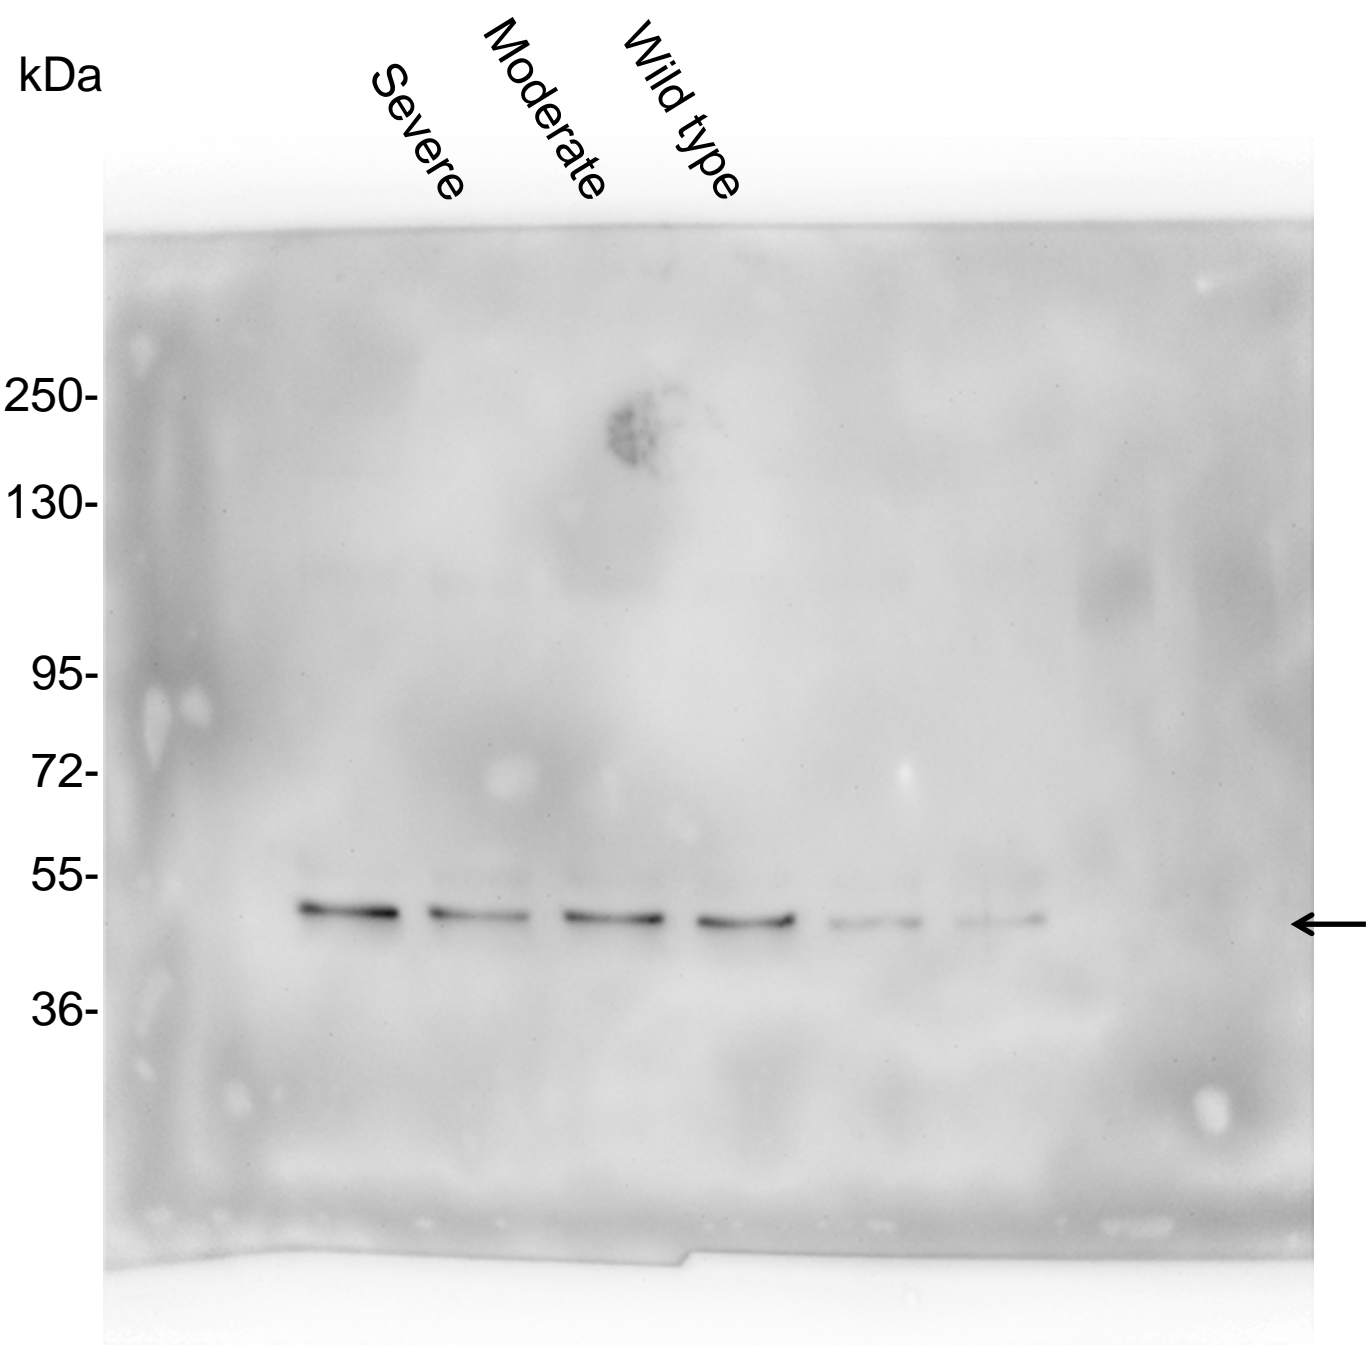

**Figure 7E.**  $\beta$ -tubulin

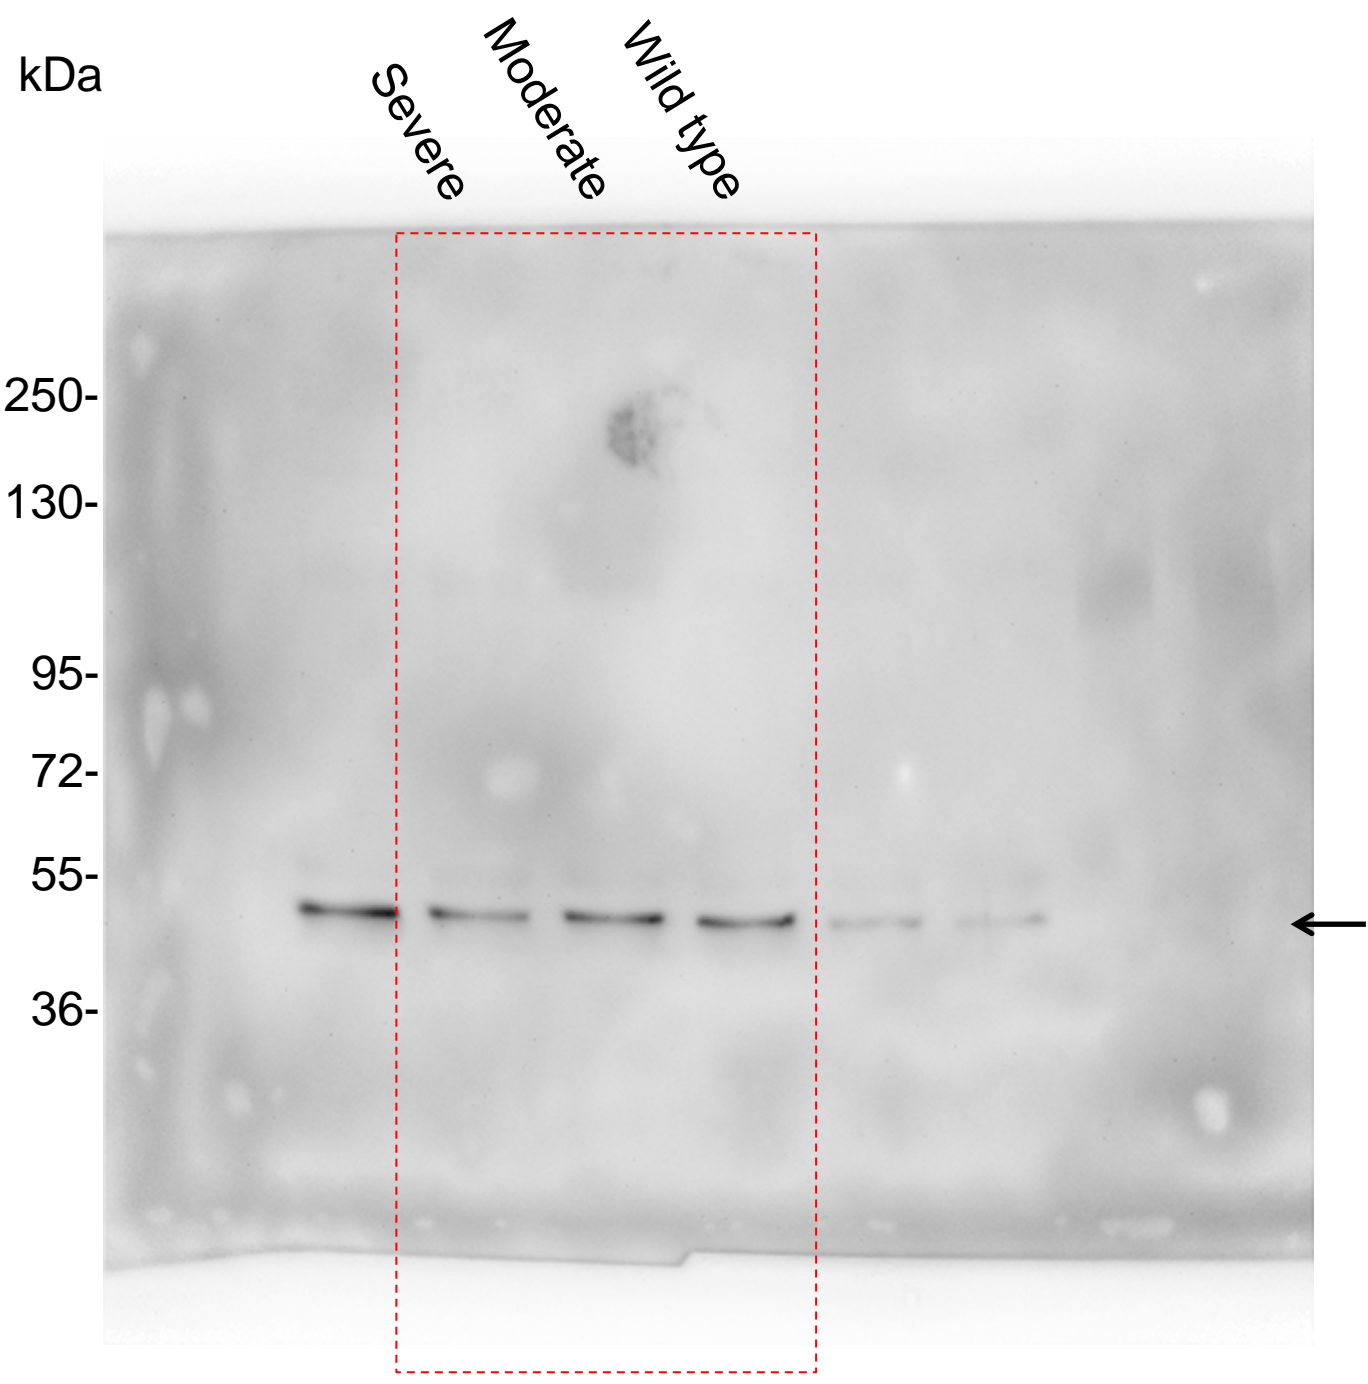

**Figure 7E.**  $\beta$ -tubulin
